# Supplementary material for: A new genetic strategy for targeting microglia in development and disease
Source: eLife. 2020 Jun 23;9:e54590. doi: 10.7554/eLife.54590 (PMC7375817; doi:10.7554/eLife.54590)
Supplement: Figure 1—source data 1. [file elife-54590-fig1-data1.xlsx]

## Sheet: Sheet1
Source data for Figure 1. Microglial recombination by P2ry12-CreER
Figure 1B: Flow cytometry analysis of P2ry12-CreER; Ai14 microglial recombination
	Mean	S.E.
% of microglia that were TdT+
89.4	94.8667	2.74853
98.1
97.1
Figure 1F: P2ry12-CreER; Ai14 CNS Recombination
% of Iba1+ microglia that were TdT+	Mean	S.E.M.
Cerebral Cortex
0.9367	0.905633	0.0306675
0.9359
0.8443
Hippocampus
0.9814	0.891833	0.0610047
0.7753
0.9188
Spinal Cord
0.7292	0.827133	0.0725408
0.9688
0.7834
Cerebellum
0.7782	0.879933	0.0538284
0.9613
0.9003
Figure 1-supplemental figure 1. qPCR and Western blot analysis of P2ry12 expression; background recombination of P2ry12-CreER
Figure 1-supplemental figure 1A: Relative P2RY12 transcript levels
Relative P2ry12 transcript levels	Mean	S.E.M.
WT
1.01	0.9999	0.0922546
0.8353
1.1544
P2ry12-CreER Heterozygote
0.8951	0.668167	0.152585
0.7314
0.378
P2ry12-CreER Homozygote
0.4994	0.542567	0.0276919
0.5341
0.5942
Figure 1-supplemental figure 1C: P2RY12 Western blot quantification
P2RY12 protein levels	Mean	S.E.M.
WT
0.991803	1.00546	0.0830978
1.15574
0.868852
WT+tamoxifen
1	1.12842	0.0974839
1.31967
1.06557
P2ry12-CreER Homozygote
2.07377	1.43989	0.413138
1.58197
0.663934
P2ry12-CreER Homozygote + tamoxifen
1.10656	1.06557	0.0626035
1.14754
0.942623
Figure 1-supplemental figure 1D: Non-tamoxifen recombination in P2ry12-CreER(CreER/+); Ai14 (F/+) mice
	Mean	S.E.M.
%Recombined IBA1+ microglia
0.457113	0.380177	0.0660395
0.434684
0.248734
