# Supplementary material for: A new genetic strategy for targeting microglia in development and disease
Source: eLife. 2020 Jun 23;9:e54590. doi: 10.7554/eLife.54590 (PMC7375817; doi:10.7554/eLife.54590)
Supplement: Figure 2—source data 1. [file elife-54590-fig2-data1.xlsx]

## Sheet: Sheet1
Source data for Figure 2. Analysis of P2ry12-CreER recombination in brain macrophage populations.
Figure 2H-J: P2ry12-CreER; Ai14 recombination in different BAM populations
	Mean	S.E.M.
% of perivascular CD206+ BAMs that were TdT+
0	0	0
0
0
% of pial CD206+ BAMs that were TdT+
0	0	0
0
0
% of dural CD206+ BAMs that were TdT+
20.2	24.3333	2.62382
23.6
29.2
% of perivascular LYVE1+ BAMs that were TdT+
0	0	0
0
0
% of pial LYVE1+ BAMs that were TdT+	0	0
0
0
0
% of dural LYVE1+ BAMs that were TdT+
26.4	25	0.945163
23.2
25.4
% of IBA1+ choroid plexus BAMs that were TdT+
22.1	21.8	3.66924
28
15.3
