# Supplementary material for: A new genetic strategy for targeting microglia in development and disease
Source: eLife. 2020 Jun 23;9:e54590. doi: 10.7554/eLife.54590 (PMC7375817; doi:10.7554/eLife.54590)
Supplement: Figure 3—source data 1. [file elife-54590-fig3-data1.xlsx]

## Sheet: Sheet1
Source data for Figure 3. P2ry12-CreER recombination in the embryonic brain.
Figure 3I-K: P2ry12-CreER; Ai14 recombination in the embryonic meninges and choroid plexus
	Mean	S.E.M.
% of meningeal CD206+ macrophages that were TdT+
3.7	8.01	3.13136
14.1
6.23
	Mean	S.E.M.
% of meningeal LYVE1+ macrophages that were TdT+
9.25	12.94	2.4934
11.88
17.69
	Mean	S.E.M.
% of IBA1+ choroid plexus macrophages that were TdT+
37.4	41.86	5.76607
34.88
53.3
