# Supplementary material for: A new genetic strategy for targeting microglia in development and disease
Source: eLife. 2020 Jun 23;9:e54590. doi: 10.7554/eLife.54590 (PMC7375817; doi:10.7554/eLife.54590)
Supplement: Figure 4—source data 1. [file elife-54590-fig4-data1.xlsx]

## Sheet: Sheet1
Source data for Figure 4. P2ry12-CreER recombination in non-microglial populations
Figure 4C: P2ry12-CreER; Ai14 recombination in adult organs
1-% recombination in CD206+ cells of the heart	Mean	S.E.M.
16.4	10.29	3.17147
8.71
5.76
2-% recombination in Cx3cr1-EGFP+ cells of the heart	Mean	S.E.M.
0	1.80667	0.903499
2.68
2.74
3-% recombination in CD206+ cells of the intestine	Mean	S.E.M.
0.59	1.83667	0.62344
2.44
2.48
4-% recombination in Cx3cr1-EGFP+ cells of the intestine	Mean	S.E.M.
3.18	1.85433	0.838148
0.303
2.08
5-% recombination in CD206+ cells of the lung	Mean	S.E.M.
7.52	5.67333	1.26592
6.25
3.25
6-% recombination in Cx3cr1-EGFP+ cells of the lung	Mean	S.E.M.
6.64	6.96333	2.51379
11.47
2.78
7-% recombination in Cx3cr1-EGFP+ cells of the spleen	Mean	S.E.M.
25.27	27.5333	5.78991
38.5
18.83
8-% recombination in Cx3cr1-EGFP+ cells of the thymus	Mean	S.E.M.
7.43	4.82333	1.30437
3.43
3.61
Figure 4D: P2ry12-CreER; Ai14 recombination in blood flow cytometry data
P2ry12-CreER; Ai14; Cx3cr1-EGFP mice
%CD45+; CD11b+ monocytes that were EGFP+	Mean	S.E.M.
34	34.925	2.56819
41
36.1
28.6
%CD45+; CD11b+ monocytes that were TdT+	Mean	S.E.M.
0	0.0175	0.0175
0.07
0
0
Cx3cr1-CreER; Ai14 mice
%CD45+; CD11b+ monocytes that were TdT+	Mean	S.E.M.
17.2	20.3	1.80416
21.8
17.5
24.7
Figure 4-supplemental figure 2: P2ry12-CreER; Ai14 recombination in embryonic organs
% recombination in CD206+ cells of the intestine	Mean	S.E.M.
0.8	3.23333	1.29142
5.2
3.7
% recombination in IBA1+ cells of the intestine	Mean	S.E.M.
4.2	8.23333	2.53136
12.9
7.6
% recombination in CD206+ cells of the lung	Mean	S.E.M.
1.8	3.23333	0.762306
3.5
4.4
% recombination in IBA1+ cells of the lung	Mean	S.E.M.
3.9	5.53333	0.924362
5.6
7.1
