# Supplementary material for: A new genetic strategy for targeting microglia in development and disease
Source: eLife. 2020 Jun 23;9:e54590. doi: 10.7554/eLife.54590 (PMC7375817; doi:10.7554/eLife.54590)
Supplement: Figure 6—source data 1. [file elife-54590-fig6-data1.xlsx]

## Sheet: Sheet1
Source data for Figure 6: Pf4-Cre robustly labels border-associated macrophages of the brain.
Figure 6F: Pf4-Cre recombination in microglia
	Mean	S.E.M.
% of microglia that were TdT+
5.48	5.24	0.788606
6.47
3.77
Figure 6G-I: Pf4-Cre recombination in border-associated macrophages
	Mean	S.E.M.
% of perivascular CD206+ BAMs that were TdT+
100	100	0
100
100
% of pial CD206+ BAMs that were TdT+
100	100	0
100
100
% of dural CD206+ BAMs that were TdT+
100	100	0
100
100
% of perivascular LYVE1+ BAMs that were TdT+
100	100	0
100
100
% of pial LYVE1+ BAMs that were TdT+	100	0
100
100
100
% of dural LYVE1+ BAMs that were TdT+
100	100	0
100
100
% of IBA1+ choroid plexus BAMs that were TdT+
87.7	80.8333	3.66075
75.2
79.6
