# Supplementary material for: A new genetic strategy for targeting microglia in development and disease
Source: eLife. 2020 Jun 23;9:e54590. doi: 10.7554/eLife.54590 (PMC7375817; doi:10.7554/eLife.54590)
Supplement: Supplementary file 1. — A short list of microglial enriched genes that were analyzed in the Tabula Muris. Of these genes, P2ry12 was selected for further analysis. [file elife-54590-supp1.xlsx]

## Sheet: Sheet1
Supplementary File 1- Microglial markers analyzed in Tabula Muris
Gene
Ccl12
Cd302
Fcgr4
Fcrls
Fpr1
HexB
Hgf
Klra2
Lrrc3
Lyplal1
Mgst1
P2ry12
Pilrb2
Rhoq
RnaseI
Sall1
Slc16a10
Slc16a7
Slc7a2
Slpi
Snx24
Tmem119
Trem2
