# Supplementary material for: A new genetic strategy for targeting microglia in development and disease
Source: eLife. 2020 Jun 23;9:e54590. doi: 10.7554/eLife.54590 (PMC7375817; doi:10.7554/eLife.54590)
Supplement: Supplementary file 2. — For details please see ‘RNA sequencing analysis’ section in Materials and methods section. [file elife-54590-supp2.xlsx]

## Sheet: ratio
Gene	baseMean	log2FoldChange	lfcSE	stat	pvalue	padj	symbol	p2	ratio	c3FC	p2FC
ENSMUSG00000090733	626.893	1.20713	0.280278	4.30691	1.65553e-05	8.72461e-05	Rps27	-13.1116	20434.3	2.30878	0.000112985
ENSMUSG00000037570	114.032	1.59644	0.335079	4.76438	1.89434e-06	1.19476e-05	Mcrs1	-12.4611	17050.2	3.02397	0.000177356
ENSMUSG00000033597	146.064	-0.463635	0.387206	-1.19739	0.231156	0.336105	Caskin1	-14.3918	15588.5	0.725157	4.65186e-05
ENSMUSG00000001995	46.4514	1.97823	0.468839	4.21942	2.44935e-05	0.000123958	Sipa1l2	-11.7613	13677.1	3.94008	0.000288078
ENSMUSG00000017737	63.2156	5.8005	0.676336	8.57636	9.79219e-18	2.18388e-16	Mmp9	-7.77919	12243.2	55.7347	0.00455231
ENSMUSG00000030102	43.5704	-0.751704	3.95162	-0.190227	0.849132	0.893618	Itpr1	-14.0857	10326.1	0.593902	5.75149e-05
ENSMUSG00000041130	37.1792	0.728238	0.493511	1.47563	0.140044	0.227448	Zfp598	-12.4346	9170.8	1.65661	0.00018064
ENSMUSG00000033039	27.7793	-0.420247	0.622145	-0.675481	0.49937	0.608824	Micall1	-13.4069	8116.8	0.747296	9.20679e-05
ENSMUSG00000008845	74.6708	6.87393	0.750491	9.15924	5.22618e-20	1.30721e-18	Cd163	-5.96325	7317.71	117.29	0.0160282
ENSMUSG00000029547	8.84028	0.745677	1.06857	0.697828	0.485284	0.596244	Ints1	-12.0057	6895.02	1.67676	0.000243184
ENSMUSG00000004937	272.266	0.892221	0.318165	2.80427	0.005043	0.0143174	Sgta	-11.6013	5766.55	1.85603	0.000321862
ENSMUSG00000078636	127.936	4.81507	1.74594	2.75787	0.00581787	0.0161997	NA	-7.60013	5461.95	28.1502	0.00515387
ENSMUSG00000002778	36.8539	2.20413	0.914948	2.40902	0.0159952	0.0383095	Kdelr1	-10.103	5067.8	4.60797	0.000909265
ENSMUSG00000040950	13.1072	6.30034	1.43063	4.40389	1.06326e-05	5.80684e-05	Mgl2	-5.97943	4972.55	78.8116	0.0158493
ENSMUSG00000026938	33.8055	6.49458	0.953285	6.81284	9.569e-12	1.24865e-10	Fcna	-5.60919	4401.47	90.17	0.0204863
ENSMUSG00000052488	86.7381	1.36203	0.376158	3.62091	0.000293565	0.00116977	Cherp	-10.6841	4229.06	2.57047	0.000607812
ENSMUSG00000025648	82.9732	3.33491	0.389445	8.56325	1.09733e-17	2.42882e-16	Pfkfb4	-8.44916	3526.64	10.0904	0.0028612
ENSMUSG00000062761	46.7099	-0.391188	0.452869	-0.8638	0.387698	0.501332	Zfp512	-12.0093	3143.47	0.762501	0.000242567
ENSMUSG00000014837	4.3098	-0.172223	3.42582	-0.050272	0.959906	0.973263	4931428F04Rik	-11.6495	2851.01	0.887474	0.000311285
ENSMUSG00000029373	328.336	6.52703	0.452698	14.4181	3.98315e-47	3.15718e-45	Pf4	-4.64212	2302.76	92.2212	0.0400481
ENSMUSG00000006641	15.5179	0.229301	0.860733	0.266402	0.789929	0.849373	Slc5a6	-10.8886	2222.42	1.17227	0.000527472
ENSMUSG00000020099	45.919	-0.57566	0.484814	-1.18738	0.235077	0.340539	Unc5b	-11.6378	2138.1	0.670979	0.00031382
ENSMUSG00000036882	27.2463	8.89082	1.38892	6.40126	1.54104e-10	1.76542e-09	Arhgap33	-1.94537	1828.17	474.682	0.259649
ENSMUSG00000057649	39.0749	-0.219605	0.651636	-0.337006	0.736112	0.809081	Brd9	-10.8469	1581.78	0.8588	0.000542934
ENSMUSG00000041202	28.111	5.34607	0.830481	6.43731	1.21607e-10	1.41244e-09	Pla2g2d	-5.24586	1543.44	40.6749	0.0263534
ENSMUSG00000025236	14.1181	0.729798	0.867614	0.841155	0.400261	0.513559	Adpgk	-9.63915	1322.41	1.65841	0.00125408
ENSMUSG00000032536	97.3601	-1.07224	0.362441	-2.95839	0.00309254	0.00939128	Trak1	-11.4169	1300.36	0.47558	0.00036573
ENSMUSG00000021314	57.0228	-1.62772	0.445202	-3.65613	0.000256047	0.00103683	Amph	-11.9343	1266.42	0.3236	0.000255523
ENSMUSG00000069972	210.49	10.0028	2.93726	3.40549	0.000660462	0.00240992	NA	-0.285593	1250.59	1025.99	0.820404
ENSMUSG00000013846	16.3188	0.139909	0.711222	0.196716	0.84405	0.889707	St3gal1	-10.1388	1242.2	1.10184	0.000887002
ENSMUSG00000033530	100.381	-1.5719	0.388516	-4.04591	5.21206e-05	0.000245948	Ttc7b	-11.7811	1183.8	0.336365	0.000284141
ENSMUSG00000043085	5.12878	4.64578	1.97039	2.3578	0.0183835	0.0430712	Tmem82	-5.54718	1170.54	25.0333	0.0213862
ENSMUSG00000024219	58.0013	1.70457	0.408532	4.17242	3.01378e-05	0.00014905	Anks1	-8.13071	913.51	3.25932	0.0035679
ENSMUSG00000037373	604.797	0.0609472	0.22283	0.273515	0.784457	0.845504	Ctbp1	-9.7627	906.176	1.04315	0.00115116
ENSMUSG00000039197	25.135	-1.78445	0.628534	-2.83906	0.00452467	0.0129968	Adk	-11.5988	900.384	0.290288	0.000322404
ENSMUSG00000039706	7.33162	-0.696002	1.49067	-0.466907	0.640567	0.731408	Ldb2	-10.4916	888.702	0.61728	0.000694586
ENSMUSG00000044595	3.96229	2.31089	1.64425	1.40544	0.159892	0.252553	Dnd1	-7.4351	858.688	4.96189	0.00577846
ENSMUSG00000030279	10.7949	7.61013	1.62162	4.69293	2.69324e-06	1.65416e-05	C2cd5	-2.09139	832.625	195.379	0.234655
ENSMUSG00000027680	28.3953	-0.00998669	0.643598	-0.015517	0.98762	0.992102	Fxr1	-9.64216	793.546	0.993102	0.00125147
ENSMUSG00000068686	34.7431	1.64145	0.628714	2.61081	0.00903288	0.0235739	Cd59b	-7.89361	741.889	3.1198	0.0042052
ENSMUSG00000022474	309.268	7.85723	2.00275	3.92322	8.73732e-05	0.000390764	Pmm1	-1.65507	730.278	231.879	0.317522
ENSMUSG00000059743	104.497	8.66616	2.90432	2.98389	0.00284608	0.00874244	Fdps	-0.825862	720.084	406.232	0.564145
ENSMUSG00000001348	11.9072	3.68788	1.1794	3.12692	0.0017665	0.00573086	Acp5	-5.7614	699.065	12.8873	0.0184351
ENSMUSG00000051256	38.7609	-0.596687	0.525957	-1.13448	0.256594	0.364684	Jagn1	-10.0155	684.446	0.661271	0.000966141
ENSMUSG00000020115	45.442	-0.783991	0.476583	-1.64502	0.0999648	0.172988	Tbk1	-10.1833	675.255	0.580758	0.000860058
ENSMUSG00000068823	60.9706	9.78458	1.28383	7.62142	2.50904e-14	4.24115e-13	Csde1	0.480087	632.312	881.966	1.39483
ENSMUSG00000031577	3.64384	1.19487	2.18046	0.547988	0.5837	0.682147	Tti2	-8.08643	622.225	2.28923	0.00367911
ENSMUSG00000035121	3.84355	1.28496	1.43879	0.893082	0.371813	0.485339	Neil2	-7.95086	602.917	2.43675	0.00404159
ENSMUSG00000051262	3.14693	-0.145686	1.50123	-0.0970448	0.922691	NA	Nat8f3	-9.36897	597.7	0.903949	0.00151238
ENSMUSG00000024273	6.66988	1.48509	2.87178	0.517131	0.605065	0.701108	2700062C07Rik	-7.59139	539.874	2.79934	0.00518518
ENSMUSG00000023147	4.63069	-2.89518	2.60171	-1.1128	0.265795	0.374745	Wrb	-11.679	440.742	0.13442	0.000304986
ENSMUSG00000005699	22.2016	-1.17838	1.03194	-1.1419	0.253495	0.361594	Pard6a	-9.83102	402.445	0.441849	0.00109791
ENSMUSG00000006345	4.86241	0.486278	1.19487	0.406972	0.684029	0.76832	Ggt1	-8.04667	370.403	1.40083	0.0037819
ENSMUSG00000034161	4.82553	3.18129	1.99621	1.59366	0.111011	0.18838	Scx	-5.29436	355.979	9.07119	0.0254824
ENSMUSG00000050623	8.09096	-0.2918	0.978399	-0.298243	0.765518	0.831735	Catsperz	-8.61429	320.124	0.816882	0.00255176
ENSMUSG00000055078	51.9744	-3.25676	0.533376	-6.10593	1.02203e-09	1.04438e-08	Gabra5	-11.5749	319.163	0.104621	0.000327797
ENSMUSG00000015968	7.65315	-0.335007	1.11587	-0.300221	0.764009	0.830561	Cacna1d	-8.64685	317.771	0.79278	0.00249482
ENSMUSG00000079168	9.63418	3.91391	1.12617	3.47541	0.000510064	0.00191535	Cd209g	-4.38723	315.423	15.0732	0.0477872
ENSMUSG00000074001	17.9143	-0.525044	0.766111	-0.685337	0.493131	0.602847	Klhl40	-8.79136	307.899	0.694938	0.00225703
ENSMUSG00000034667	8.52977	6.9211	1.70755	4.05323	5.05145e-05	0.000239235	Xpot	-1.27507	293.287	121.188	0.413206
ENSMUSG00000036437	18.3029	-3.10143	0.914439	-3.39162	0.00069481	0.00251646	Npy1r	-11.2855	290.838	0.116514	0.000400614
ENSMUSG00000006519	1185.84	14.3937	1.20624	11.9327	7.99652e-33	3.84456e-31	Cyba	6.24739	283.316	21524	75.9716
ENSMUSG00000037095	5.08148	-0.763753	1.41291	-0.540552	0.588816	0.686416	Lrg1	-8.89942	281.242	0.588962	0.00209415
ENSMUSG00000024672	11.8764	3.97292	1.06904	3.71634	0.000202127	0.000834525	Ms4a7	-4.15652	280.03	15.7024	0.0560742
ENSMUSG00000046637	4.04896	0.988734	1.30952	0.755036	0.450227	0.562772	Ttc34	-7.1218	276.384	1.98444	0.00718001
ENSMUSG00000100405	31.6066	8.93171	1.36633	6.53701	6.27619e-11	7.52822e-10	NA	0.829056	274.878	488.327	1.77652
ENSMUSG00000009356	3.79939	-0.341776	1.38818	-0.246205	0.805524	0.860384	Lpo	-8.37401	261.783	0.789069	0.00301421
ENSMUSG00000030680	106.532	0.395103	0.325688	1.21313	0.225079	0.329228	NA	-7.60572	256.146	1.31504	0.00513392
ENSMUSG00000026167	16.7795	-1.1815	0.748067	-1.5794	0.114245	0.192697	Wnt10a	-9.11815	245.003	0.440894	0.00179954
ENSMUSG00000070436	9.86842	-3.6134	1.54728	-2.33533	0.019526	0.0452508	Serpinh1	-11.5228	240.423	0.0817066	0.000339845
ENSMUSG00000026278	70.1385	-1.21545	0.478963	-2.53768	0.0111591	0.0281916	Bok	-9.09626	235.7	0.430638	0.00182706
ENSMUSG00000079774	4.77812	-0.814757	1.45017	-0.561834	0.574229	0.673965	Fam205a2	-8.59167	219.323	0.568504	0.00259208
ENSMUSG00000079434	5.92612	-1.03124	1.18856	-0.867638	0.385593	0.499435	Neu2	-8.78904	216.437	0.489289	0.00226066
ENSMUSG00000078173	3.94932	-0.326679	1.35836	-0.240495	0.809946	0.863535	Lenep	-7.96832	199.693	0.79737	0.00399298
ENSMUSG00000025894	3.64108	-3.68949	2.7455	-1.34383	0.179002	0.275647	Aasdhppt	-11.3139	197.323	0.0775089	0.000392801
ENSMUSG00000000889	3.62325	-2.09745	1.65974	-1.26372	0.20633	0.308732	Dbh	-9.6429	186.812	0.23367	0.00125083
ENSMUSG00000034917	7.92132	1.38697	2.75869	0.502765	0.61513	0.709337	Tjp3	-6.1249	182.514	2.61529	0.0143292
ENSMUSG00000035285	23.7714	-2.06158	0.830239	-2.48311	0.0130239	0.0321921	Nat14	-9.4729	170.227	0.239554	0.00140726
ENSMUSG00000020639	6.12528	-2.00432	1.38329	-1.44895	0.147351	0.236727	Pfn4	-9.3876	166.951	0.249252	0.00149296
ENSMUSG00000025473	4.23076	2.14127	1.39882	1.53077	0.125827	0.208721	Adam8	-5.21326	163.657	4.41151	0.0269557
ENSMUSG00000001472	117.802	5.56707	0.632089	8.8074	1.28076e-18	2.99296e-17	Tcf25	-1.78603	163.495	47.4083	0.289968
ENSMUSG00000020216	24.1373	0.164795	0.639617	0.257647	0.796679	0.854516	Jsrp1	-7.14023	158.136	1.12101	0.00708889
ENSMUSG00000039328	14.4677	1.13918	0.882206	1.29129	0.196603	0.296981	Rnf122	-6.16485	158.027	2.20256	0.0139378
ENSMUSG00000042821	2.89952	-1.20689	1.67863	-0.718971	0.472159	NA	Snai1	-8.44481	150.95	0.433202	0.00286985
ENSMUSG00000019734	3.44706	0.631311	1.64547	0.383666	0.701226	NA	Tmc4	-6.57853	148.04	1.54897	0.0104632
ENSMUSG00000028184	4.52608	-0.685693	2.26649	-0.302536	0.762244	0.829565	Adgrl2	-7.82905	141.373	0.621707	0.00439764
ENSMUSG00000028865	5.61859	0.981404	1.1255	0.871971	0.383224	0.496751	Cd164l2	-6.10938	136.313	1.97439	0.0144842
ENSMUSG00000059070	4.19793	-1.38142	1.67258	-0.825918	0.408851	0.522124	Rpl18	-8.45847	135.022	0.383841	0.00284281
ENSMUSG00000079391	1.79677	-0.250509	3.96499	-0.0631802	0.949623	NA	NA	-7.32629	134.903	0.8406	0.00623115
ENSMUSG00000001103	4.45183	-0.271779	1.33051	-0.204267	0.838145	0.885551	Sebox	-7.30233	130.74	0.828298	0.00633547
ENSMUSG00000008540	14.8282	-2.35608	0.88324	-2.66754	0.00764078	0.0204504	Mgst1	-9.38457	130.552	0.195321	0.00149611
ENSMUSG00000071553	5.23164	-0.719369	1.2635	-0.569344	0.569122	0.669378	Cpa2	-7.7252	128.519	0.607363	0.00472588
ENSMUSG00000020067	3.43748	-0.593157	1.46237	-0.405613	0.685027	NA	Mypn	-7.57353	126.271	0.662891	0.00524976
ENSMUSG00000042734	12.9279	7.82345	1.55874	5.0191	5.19152e-07	3.64027e-06	Ttc9	0.854877	125.242	226.513	1.8086
ENSMUSG00000049154	3.35696	-0.50511	1.52133	-0.332018	0.739876	NA	Fam183b	-7.46674	124.64	0.704607	0.00565312
ENSMUSG00000020131	18.7077	0.0986756	0.690162	0.142975	0.88631	0.921553	Pcsk4	-6.8536	123.835	1.07079	0.0086469
ENSMUSG00000025354	9.67111	5.60569	2.20735	2.53956	0.0110992	0.0280753	Dnajc14	-1.3382	123.118	48.6947	0.395513
ENSMUSG00000096257	5.25882	0.0435787	1.17329	0.0371424	0.970371	0.980316	Ccer2	-6.86696	120.304	1.03067	0.00856718
ENSMUSG00000032415	2.92902	-1.41869	1.72496	-0.822443	0.410825	NA	Ube2cbp	-8.31851	119.413	0.374053	0.00313242
ENSMUSG00000006360	44.451	1.35273	0.526755	2.56805	0.0102272	0.0262242	Crip1	-5.53533	118.444	2.55396	0.0215625
ENSMUSG00000001128	35.9414	4.54169	0.735054	6.17871	6.46267e-10	6.75098e-09	Cfp	-2.33752	117.719	23.2908	0.19785
ENSMUSG00000002769	4.60355	0.817752	1.57715	0.518501	0.604109	0.70035	Gnmt	-6.04288	116.213	1.76266	0.0151674
ENSMUSG00000044017	2.8838	-0.14191	1.71241	-0.0828717	0.933954	NA	Adgrd1	-6.98962	115.177	0.906319	0.00786893
ENSMUSG00000103442	9.83494	-0.180693	3.95351	-0.0457045	0.963546	0.975773	Pcdha1	-7.02496	114.902	0.882279	0.00767852
ENSMUSG00000073877	43.2487	-0.32822	0.520798	-0.630226	0.528547	0.634765	Gm13306	-7.172	114.864	0.796518	0.00693447
ENSMUSG00000044676	16.6501	-1.8261	0.907835	-2.01149	0.0442735	0.0888423	Zfp612	-8.66985	114.861	0.282025	0.00245535
ENSMUSG00000027932	6.7975	-0.804556	1.30862	-0.614814	0.538678	0.642525	Slc27a3	-7.6465	114.718	0.572538	0.00499084
ENSMUSG00000053965	4.63247	-2.12246	1.40098	-1.51498	0.129776	0.214008	Pde5a	-8.95815	114.221	0.229655	0.00201061
ENSMUSG00000031644	10.3487	0.805517	1.42918	0.563622	0.573011	0.672805	Nek1	-6.02893	114.123	1.74777	0.0153148
ENSMUSG00000068762	8.80881	-1.25862	1.02988	-1.2221	0.221669	0.325416	Gstm6	-8.04985	110.755	0.417942	0.00377357
ENSMUSG00000100241	2.83076	-1.19781	1.60533	-0.746147	0.455579	NA	Slc18a3	-7.97815	109.922	0.435936	0.00396585
ENSMUSG00000028778	2.70329	-1.58027	1.82956	-0.863742	0.38773	NA	Hcrtr1	-8.34022	108.38	0.33442	0.00308562
ENSMUSG00000099471	19.4698	4.4642	1.02979	4.33507	1.45711e-05	7.77161e-05	Gm8451	-2.2545	105.325	22.0728	0.209569
ENSMUSG00000043298	3.95644	-1.07866	1.73061	-0.62328	0.5331	0.638315	Smco3	-7.78813	104.653	0.473469	0.00452418
ENSMUSG00000007888	8.48342	-1.01046	0.993386	-1.01719	0.309065	0.421358	Crlf1	-7.67795	101.652	0.496389	0.00488323
ENSMUSG00000027245	136.596	0.56934	0.566802	1.00448	0.315148	0.427547	Hypk	-6.05492	98.6508	1.48384	0.0150414
ENSMUSG00000091996	3.55426	0.0895714	1.36747	0.0655018	0.947775	NA	BC049352	-6.48513	95.3195	1.06405	0.011163
ENSMUSG00000057729	7.1615	-1.09351	1.10307	-0.991331	0.321524	0.434089	Prtn3	-7.66403	95.0438	0.46862	0.00493057
ENSMUSG00000039234	3.90206	2.14525	1.74943	1.22625	0.220104	0.323807	Sec24d	-4.41273	94.221	4.42368	0.0469501
ENSMUSG00000040280	3.58284	0.328961	1.4956	0.219953	0.825908	NA	Ndufa4l2	-6.2188	93.5565	1.25611	0.0134262
ENSMUSG00000000318	37.1104	4.94656	0.695726	7.10992	1.16112e-12	1.66721e-11	Clec10a	-1.60098	93.5418	30.8363	0.329653
ENSMUSG00000000942	3.91588	-0.736332	1.36207	-0.540599	0.588784	0.686416	Hoxa4	-7.24488	91.0478	0.600264	0.00659284
ENSMUSG00000025094	1.93021	-3.56222	2.71181	-1.3136	0.188982	NA	Slc18a2	-10.0679	90.8655	0.0846574	0.000931679
ENSMUSG00000046750	3.34554	0.180101	1.43004	0.125941	0.899778	NA	Selenov	-6.32012	90.5233	1.13296	0.0125157
ENSMUSG00000032526	56.7791	-1.90655	0.511348	-3.72848	0.000192638	0.000798247	Ss18l2	-8.34009	86.4346	0.266729	0.00308591
ENSMUSG00000028971	16.2867	-1.39991	0.817769	-1.71186	0.0869218	0.153702	Cort	-7.82745	86.0762	0.378953	0.00440253
ENSMUSG00000064080	2.76017	-0.127556	1.76862	-0.072122	0.942505	NA	Fbln2	-6.52207	84.1278	0.915381	0.0108808
ENSMUSG00000025420	3.06925	-0.433746	1.54478	-0.280782	0.778877	NA	Katnal2	-6.82616	84.0056	0.740337	0.00881295
ENSMUSG00000032268	3.45205	-1.35504	1.64845	-0.822005	0.411074	NA	Tmprss5	-7.70343	81.4809	0.390925	0.00479775
ENSMUSG00000040812	5.84991	-0.231831	1.23014	-0.188459	0.850517	0.894755	Agbl2	-6.57471	81.1702	0.851554	0.010491
ENSMUSG00000097656	4.5218	4.37577	2.00567	2.1817	0.0291315	0.0630292	NA	-1.9632	80.9505	20.7605	0.256459
ENSMUSG00000090394	7.18966	3.41463	1.40754	2.42596	0.0152679	0.0368004	4930523C07Rik	-2.92224	80.8329	10.6637	0.131922
ENSMUSG00000057058	3.24508	-0.732251	1.53206	-0.477951	0.632685	NA	Skap1	-7.03038	78.6913	0.601964	0.00764969
ENSMUSG00000049598	4.23044	0.245749	1.30997	0.187598	0.851192	0.895144	Vsig8	-6.04274	78.1668	1.18571	0.0151689
ENSMUSG00000030787	12.6216	3.96924	0.981742	4.04306	5.27584e-05	0.000248358	Lyve1	-2.31123	77.734	15.6625	0.201488
ENSMUSG00000025150	112.977	5.97435	0.531415	11.2423	2.52586e-29	1.04703e-27	Cbr2	-0.271561	75.8937	62.872	0.828422
ENSMUSG00000008028	13.9828	-0.718242	0.890949	-0.806154	0.420154	0.53325	1700008O03Rik	-6.95774	75.5571	0.607838	0.00804475
ENSMUSG00000054836	6.91385	-0.575935	1.05597	-0.545407	0.585474	0.68347	Elp6	-6.79505	74.4973	0.670852	0.00900505
ENSMUSG00000047986	6.16388	-1.99153	1.25912	-1.58169	0.113721	0.192034	Palm3	-8.1994	73.9191	0.251472	0.003402
ENSMUSG00000037490	4.49491	-1.52973	1.32777	-1.15211	0.249277	0.356967	Slc2a12	-7.73254	73.6597	0.346341	0.00470191
ENSMUSG00000039942	4.24747	0.670392	1.44921	0.462592	0.643657	0.733937	Ptger4	-5.50283	72.1645	1.59151	0.0220538
ENSMUSG00000009633	15.2584	-1.329	0.847351	-1.56842	0.116783	0.196216	G0s2	-7.4481	69.5074	0.398043	0.00572662
ENSMUSG00000031323	15.5637	-2.68783	0.842934	-3.18866	0.00142933	0.00475468	Dmrtc1a	-8.80165	69.2538	0.155197	0.00224098
ENSMUSG00000081143	6.66549	-1.13664	1.28555	-0.884163	0.376608	0.490125	NA	-7.16379	65.2159	0.454819	0.00697404
ENSMUSG00000027744	3.60697	-0.396347	1.42888	-0.277383	0.781486	NA	Stoml3	-6.41959	65.0396	0.75978	0.0116818
ENSMUSG00000097239	41.0055	0.116638	0.498303	0.234071	0.81493	0.867193	NA	-5.88625	64.1282	1.08421	0.0169068
ENSMUSG00000095779	2.77159	-0.887993	2.37858	-0.373329	0.708903	NA	LOC108169010	-6.84738	62.2235	0.540365	0.00868427
ENSMUSG00000081382	8.61297	6.31283	2.04674	3.08433	0.00204008	0.00651395	NA	0.361195	61.8901	79.4972	1.28449
ENSMUSG00000064358	1066.88	-5.63656	0.41614	-13.5448	8.49911e-42	5.86489e-40	COX3	-11.5831	61.6723	0.0201015	0.00032594
ENSMUSG00000055415	5.95766	3.07104	1.26583	2.4261	0.0152621	0.0367941	Atp10b	-2.84836	60.5225	8.40377	0.138854
ENSMUSG00000039109	52.3344	5.65727	0.821803	6.88398	5.82023e-12	7.83894e-11	F13a1	-0.217074	58.6618	50.4672	0.860308
ENSMUSG00000025400	33.1578	-2.75315	0.659295	-4.1759	2.96814e-05	0.000147414	Tac2	-8.62367	58.5063	0.148327	0.00253523
ENSMUSG00000044364	11.462	-1.149	0.88875	-1.29282	0.196072	0.296511	Tmem74b	-7.01003	58.1228	0.450939	0.00775838
ENSMUSG00000078963	2.19905	-3.05418	2.20974	-1.38215	0.166927	NA	Hsbp1l1	-8.89469	57.3022	0.120393	0.00210102
ENSMUSG00000005681	3.80898	-1.09404	1.62016	-0.675267	0.499506	0.608864	Apoa2	-6.92354	56.8659	0.468447	0.00823774
ENSMUSG00000103310	2.5866	-3.02697	3.13927	-0.964227	0.334932	NA	Pcdha12	-8.82695	55.7144	0.122685	0.00220204
ENSMUSG00000036816	5.55239	-1.74683	1.39631	-1.25103	0.210924	0.313963	Atoh7	-7.50828	54.2464	0.297956	0.00549264
ENSMUSG00000030865	3.9711	2.03811	1.36746	1.49043	0.136111	0.22226	Chp2	-3.71893	54.0806	4.10707	0.0759436
ENSMUSG00000026955	2.88622	-1.02539	2.06747	-0.495963	0.61992	NA	Sapcd2	-6.75746	53.1527	0.491277	0.00924275
ENSMUSG00000042340	3.88399	-0.76194	1.44922	-0.52576	0.599055	0.695701	Ctf1	-6.48421	52.7927	0.589703	0.0111702
ENSMUSG00000044320	5.58304	-1.85264	1.42505	-1.30005	0.193583	0.293477	1700001O22Rik	-7.57102	52.6506	0.276884	0.0052589
ENSMUSG00000020407	3.18853	-0.445753	1.74114	-0.256013	0.797941	NA	Upp1	-6.1635	52.6275	0.734201	0.0139509
ENSMUSG00000029376	4.41583	-4.00216	1.84627	-2.1677	0.0301814	0.064822	Mthfd2l	-9.69829	51.8449	0.0624065	0.00120371
ENSMUSG00000017491	6.73377	-3.07465	1.41335	-2.17544	0.0295972	0.0637612	Rarb	-8.75653	51.3356	0.118697	0.00231217
ENSMUSG00000026435	2.79347	-0.812846	1.57629	-0.515669	0.606086	NA	Slc45a3	-6.46112	50.1534	0.569258	0.0113503
ENSMUSG00000014158	14.453	6.3391	1.30077	4.87335	1.09724e-06	7.24351e-06	Trpv4	0.704088	49.6944	80.9578	1.62911
ENSMUSG00000045377	6.05616	-1.08617	1.13396	-0.957859	0.338134	0.450963	Tmem88	-6.70398	49.1054	0.471009	0.0095918
ENSMUSG00000051736	6.60332	-1.34952	1.14492	-1.1787	0.238517	0.344587	Fam229b	-6.94762	48.4394	0.392423	0.00810133
ENSMUSG00000042258	3.57266	-1.91568	1.68667	-1.13578	0.25605	NA	Isl1	-7.47805	47.2542	0.265048	0.00560897
ENSMUSG00000096215	3.41156	0.336527	1.49123	0.22567	0.821458	NA	Smim22	-5.20585	46.6039	1.26271	0.0270946
ENSMUSG00000020592	6.03124	0.865016	1.39196	0.621436	0.534313	0.639072	Sdc1	-4.66007	46.0486	1.82136	0.039553
ENSMUSG00000039851	2.89804	-1.05651	1.58171	-0.667954	0.504163	NA	4932438H23Rik	-6.56459	45.5089	0.480793	0.0105648
ENSMUSG00000092074	8.6618	-1.10026	1.00226	-1.09778	0.272302	0.382239	Dynlt1a	-6.57886	44.5887	0.466433	0.0104608
ENSMUSG00000087075	11.1214	-0.896808	0.896388	-1.00047	0.317084	0.429578	Lbhd2	-6.35805	44.0551	0.537074	0.0121909
ENSMUSG00000039476	4.8308	-2.03208	1.61421	-1.25887	0.208078	0.310674	Prrx2	-7.48885	43.9191	0.244503	0.00556712
ENSMUSG00000020608	20.6847	-4.57726	1.54646	-2.95983	0.00307808	0.00935708	Smc6	-10.0107	43.2141	0.0418896	0.000969349
ENSMUSG00000040121	6.10323	-1.47155	1.34768	-1.09191	0.274873	0.385019	Rep15	-6.90468	43.2054	0.360596	0.00834609
ENSMUSG00000006546	2.52384	-1.12902	1.83338	-0.615811	0.538019	NA	Cryba2	-6.55688	43.0477	0.457227	0.0106214
ENSMUSG00000059479	9.25767	5.6736	1.40287	4.04429	5.24828e-05	0.000247341	B3gnt8	0.309384	41.1899	51.0417	1.23918
ENSMUSG00000100862	9.64708	1.37362	2.67596	0.513321	0.607727	0.70329	NA	-3.9713	40.6427	2.59121	0.0637559
ENSMUSG00000060586	185.414	4.66251	0.35175	13.2552	4.212e-40	2.71489e-38	H2-Eb1	-0.678264	40.5259	25.3253	0.624917
ENSMUSG00000038374	17.0827	7.22454	3.92266	1.84175	0.0655123	0.122357	Rbm8a	1.89272	40.2753	149.556	3.71335
ENSMUSG00000000296	2.53516	-3.20031	3.11095	-1.02872	0.303609	NA	Tpd52l1	-8.5234	40.0322	0.108795	0.0027177
ENSMUSG00000045179	10.1826	-1.91203	1.11317	-1.71764	0.0858622	0.152267	Sox3	-7.233	39.9733	0.265718	0.00664738
ENSMUSG00000027358	2.89068	-2.52259	1.7968	-1.40394	0.160338	NA	Bmp2	-7.82566	39.4805	0.17403	0.00440801
ENSMUSG00000031139	3.32375	-2.40345	1.7215	-1.39614	0.162673	NA	Mcf2	-7.69495	39.1652	0.189011	0.00482601
ENSMUSG00000091938	10.1035	0.226502	0.952441	0.237812	0.812027	0.86536	Gm12407	-5.05479	38.8891	1.16999	0.0300855
ENSMUSG00000094103	66.3527	7.59266	2.9587	2.56621	0.0102815	0.0263289	1700047I17Rik2	2.31213	38.8685	193.027	4.96615
ENSMUSG00000093803	5.18347	5.92754	2.41761	2.45182	0.0142135	0.034665	Ppp2r3d	0.672997	38.1748	60.8651	1.59438
ENSMUSG00000032062	2.21207	-3.00465	2.21444	-1.35684	0.174831	NA	2310030G06Rik	-8.25821	38.1487	0.124598	0.00326611
ENSMUSG00000039481	19.237	0.483267	0.696567	0.693784	0.487818	0.598097	Nrtn	-4.74915	37.5937	1.39791	0.0371845
ENSMUSG00000051906	40.7737	5.33196	0.735393	7.25049	4.15275e-13	6.17438e-12	Cd209f	0.105708	37.4333	40.2791	1.07602
ENSMUSG00000030577	34.0485	8.27254	1.33464	6.19835	5.70584e-10	6.02593e-09	Cd22	3.09003	36.3153	309.231	8.51515
ENSMUSG00000095325	3.3388	-2.88606	1.92748	-1.49733	0.134308	NA	Zfp870	-8.04991	35.8486	0.135272	0.00377342
ENSMUSG00000074218	17.6737	-1.59288	0.83967	-1.89704	0.0578232	0.110892	Cox7a1	-6.75611	35.8331	0.331508	0.00925144
ENSMUSG00000021978	17.7585	6.05709	1.47762	4.09922	4.14544e-05	0.000199386	Extl3	0.898735	35.7124	66.5832	1.86443
ENSMUSG00000024205	15.4983	3.8274	1.04217	3.67252	0.000240174	0.000976937	NA	-1.3306	35.7035	14.1959	0.397604
ENSMUSG00000022758	5.10299	-0.352813	1.23156	-0.286477	0.774513	0.838097	P2rx6	-5.47573	34.8458	0.783056	0.022472
ENSMUSG00000020098	25.0288	-2.00931	0.666976	-3.01257	0.00259049	0.00805862	Pcbd1	-7.12882	34.7638	0.248392	0.00714515
ENSMUSG00000041774	33.5309	2.29762	1.17531	1.9549	0.0505949	0.099352	Ydjc	-2.82075	34.7364	4.91647	0.141537
ENSMUSG00000028256	3.23279	-1.34754	1.55038	-0.869171	0.384754	NA	Odf2l	-6.45598	34.4978	0.39296	0.0113909
ENSMUSG00000021241	4.17759	-3.63922	2.6226	-1.38764	0.165248	0.258988	Isca2	-8.74217	34.3669	0.0802577	0.00233532
ENSMUSG00000075394	8.90971	-0.890083	0.966952	-0.920504	0.357309	0.470332	Hoxc4	-5.97958	34.0479	0.539583	0.0158478
ENSMUSG00000048782	10.4222	-2.22248	0.99733	-2.22843	0.0258516	0.05707	Insc	-7.28042	33.3112	0.214272	0.00643244
ENSMUSG00000024480	84.3949	-3.37733	0.785309	-4.30064	1.70308e-05	8.93908e-05	Ap3s1	-8.41213	32.7812	0.0962326	0.00293561
ENSMUSG00000032097	16.134	7.88287	1.48852	5.2958	1.18499e-07	9.29222e-07	Ddx6	2.85632	32.5945	236.038	7.24164
ENSMUSG00000035458	2.7044	-1.26514	1.82238	-0.694224	0.487542	NA	Tnni3	-6.28159	32.367	0.416059	0.0128544
ENSMUSG00000036111	66.4372	-1.60949	0.418912	-3.84207	0.000122001	0.000531034	Lmo1	-6.62203	32.2794	0.327715	0.0101525
ENSMUSG00000032898	15.9388	1.88491	3.84033	0.49082	0.623554	0.716439	Fbxo21	-3.11656	32.0328	3.6933	0.115298
ENSMUSG00000041476	3.03124	-1.59895	1.69253	-0.944711	0.344807	NA	Smpx	-6.58702	31.7364	0.330116	0.0104018
ENSMUSG00000033633	2.74916	-2.24191	1.81958	-1.23211	0.21791	NA	Clec18a	-7.22951	31.7262	0.211406	0.00666345
ENSMUSG00000057054	2.87428	-0.445666	1.59095	-0.280126	0.779381	NA	Inca1	-5.40817	31.1791	0.734245	0.0235493
ENSMUSG00000038253	9.763	-2.69018	1.16031	-2.31851	0.0204216	0.0470028	Hoxa5	-7.62059	30.493	0.154944	0.00508128
ENSMUSG00000020646	8.36751	-2.94177	1.2957	-2.2704	0.0231831	0.0521201	Mboat2	-7.86094	30.2565	0.130149	0.00430151
ENSMUSG00000022235	15.9209	-2.27175	0.948139	-2.39601	0.0165744	0.0395353	Cmbl	-7.14626	29.334	0.207078	0.00705931
ENSMUSG00000020672	2.69023	-1.0713	1.90808	-0.561454	0.574488	NA	Sntg2	-5.91965	28.807	0.47589	0.0165199
ENSMUSG00000074971	8.28544	-2.79105	1.1701	-2.38531	0.0170647	0.0405425	Fibin	-7.63228	28.6653	0.144481	0.00504026
ENSMUSG00000025902	3.88258	-2.99225	1.62866	-1.83725	0.066173	0.123395	Sox17	-7.82869	28.5703	0.125673	0.00439874
ENSMUSG00000079137	7.22204	5.5722	1.66179	3.35314	0.000799003	0.00285417	NA	0.736913	28.5474	47.5772	1.66661
ENSMUSG00000020363	4.15996	0.143774	1.42138	0.101151	0.91943	0.945391	Gfpt2	-4.69109	28.539	1.10479	0.0387117
ENSMUSG00000058704	2.58829	-3.03863	3.09904	-0.980506	0.326836	NA	Memo1	-7.86919	28.4541	0.121697	0.00427697
ENSMUSG00000078640	11.4986	-1.77854	0.890007	-1.99834	0.0456799	0.0913208	Gm11627	-6.598	28.236	0.291479	0.0103229
ENSMUSG00000059327	11.2946	0.314873	1.0457	0.301112	0.763329	0.830152	Eda	-4.50394	28.2232	1.2439	0.0440737
ENSMUSG00000060572	5.50663	-2.65049	1.52549	-1.73747	0.0823046	0.147003	Mfap2	-7.45328	27.9115	0.159266	0.00570609
ENSMUSG00000103707	4.28798	-3.43206	1.81582	-1.89009	0.0587464	0.11225	Pcdha6	-8.2278	27.7755	0.0926506	0.0033357
ENSMUSG00000022721	14.4464	5.63877	1.26196	4.46826	7.88599e-06	4.41578e-05	Trmt2a	0.851605	27.6108	49.824	1.80451
ENSMUSG00000036594	444.156	4.08178	0.612122	6.66824	2.58882e-11	3.2446e-10	H2-Aa	-0.69041	27.3257	16.9331	0.619678
ENSMUSG00000100865	17.1323	0.865788	0.926407	0.934566	0.350012	0.462908	NA	-3.90072	27.2183	1.82233	0.0669526
ENSMUSG00000026807	3.45591	-0.959175	1.62823	-0.589091	0.5558	NA	Ak8	-5.71899	27.0923	0.514351	0.0189851
ENSMUSG00000045319	24.8758	2.88576	1.20104	2.40273	0.0162733	0.0388961	Proser2	-1.86095	26.8475	7.39097	0.275295
ENSMUSG00000032387	7.49756	-3.02688	1.3177	-2.29709	0.0216136	0.0491566	Rbpms2	-7.76488	26.6857	0.122693	0.00459769
ENSMUSG00000062198	3.36956	-2.31709	2.05704	-1.12642	0.259987	NA	2700097O09Rik	-7.04688	26.5343	0.200672	0.00756273
ENSMUSG00000074215	2.53934	-1.66282	1.8324	-0.907456	0.364166	NA	NA	-6.38832	26.4555	0.315821	0.0119378
ENSMUSG00000050010	6.04967	-1.48547	1.36429	-1.08883	0.27623	0.386295	Shisa3	-6.20788	26.399	0.357132	0.0135282
ENSMUSG00000030748	12.7028	7.89418	1.56264	5.05182	4.37614e-07	3.11886e-06	Il4ra	3.17212	26.3926	237.895	9.0137
ENSMUSG00000040706	3.4759	-1.55592	1.71411	-0.907713	0.36403	NA	Agmat	-6.26349	26.1289	0.340112	0.0130167
ENSMUSG00000091449	34.2565	0.858568	0.650465	1.31993	0.186858	0.285607	NA	-3.84396	26.0376	1.81324	0.0696393
ENSMUSG00000048731	25.7532	2.48109	0.604799	4.10234	4.08994e-05	0.000197039	Ggnbp1	-2.22039	26.0187	5.58319	0.214584
ENSMUSG00000075588	4.31066	-2.18818	1.48804	-1.47052	0.141422	0.229239	Hoxb2	-6.88784	25.9859	0.219428	0.00844409
ENSMUSG00000048721	4.86848	-1.30023	1.32386	-0.982152	0.326025	0.439155	Fndc9	-5.99797	25.9514	0.406061	0.015647
ENSMUSG00000035401	39.5216	2.80204	0.561409	4.99108	6.00417e-07	4.14811e-06	Emsy	-1.88168	25.7004	6.97426	0.271368
ENSMUSG00000023336	8.45248	-1.38256	1.07724	-1.28343	0.199342	0.300228	Wfdc1	-6.05388	25.4806	0.383538	0.0150522
ENSMUSG00000072812	2.89042	-2.17169	1.87333	-1.15926	0.246349	NA	Ahnak2	-6.83957	25.4198	0.221951	0.00873142
ENSMUSG00000072680	11.3392	-1.72947	1.15156	-1.50185	0.133135	0.218418	Tmem254c	-6.39209	25.3272	0.301562	0.0119067
ENSMUSG00000022751	9.25789	5.12571	1.80816	2.83476	0.00458595	0.0131471	Nit2	0.486602	24.9178	34.9134	1.40114
ENSMUSG00000020053	17.2216	2.54388	0.728244	3.49317	0.000477318	0.00180685	Igf1	-2.07011	24.4878	5.83156	0.238141
ENSMUSG00000031506	5.75321	0.283052	1.17657	0.240575	0.809885	0.863535	Ptpn7	-4.30304	24.0189	1.21677	0.0506588
ENSMUSG00000040714	6.97668	0.79661	1.13379	0.702608	0.4823	0.593784	Klc3	-3.7354	23.135	1.73701	0.0750816
ENSMUSG00000090121	2.54981	-1.22049	1.80938	-0.674534	0.499972	NA	Abhd12b	-5.74662	23.041	0.429137	0.018625
ENSMUSG00000015340	16.1229	4.88613	1.04543	4.6738	2.95682e-06	1.80395e-05	Cybb	0.361337	23.0197	29.5715	1.28462
ENSMUSG00000028747	3.19583	0.597053	1.49114	0.4004	0.688862	NA	Htr6	-3.92039	22.9026	1.51262	0.0660459
ENSMUSG00000062753	193.708	-0.231093	2.15736	-0.107119	0.914695	0.941914	AI413582	-4.74253	22.8075	0.851989	0.0373556
ENSMUSG00000022488	138.441	11.3312	1.2417	9.12559	7.1349e-20	1.76955e-18	Nckap1l	6.84879	22.3535	2576.54	115.263
ENSMUSG00000103034	563.446	5.06922	0.938961	5.39875	6.71052e-08	5.49345e-07	NA	0.602246	22.1153	33.5728	1.51808
ENSMUSG00000032511	3.96832	-1.91164	1.66595	-1.14748	0.251184	0.358936	Scn5a	-6.37686	22.0884	0.265791	0.012033
ENSMUSG00000005705	2.54355	-1.09687	1.89255	-0.579571	0.562204	NA	Agrp	-5.55886	22.0391	0.46753	0.0212137
ENSMUSG00000032680	4.14968	0.516537	1.35786	0.380406	0.703644	0.783141	6820408C15Rik	-3.92529	21.7332	1.43052	0.0658218
ENSMUSG00000019846	3.68058	-1.7635	1.70753	-1.03278	0.301709	0.413572	Lama4	-6.18955	21.4968	0.294534	0.0137013
ENSMUSG00000021919	1.92445	0.948601	3.71538	0.255317	0.798478	NA	Chat	-3.47189	21.4142	1.93	0.0901273
ENSMUSG00000079550	60.5449	0.014221	0.420909	0.0337864	0.973048	0.982296	Mpp4	-4.40089	21.3344	1.00991	0.047337
ENSMUSG00000018339	140.694	1.50568	0.305628	4.92653	8.37013e-07	5.66263e-06	Gpx3	-2.90146	21.217	2.83959	0.133836
ENSMUSG00000027322	8.96737	3.04894	1.44296	2.11298	0.0346022	0.072395	Siglec1	-1.35487	21.168	8.27603	0.39097
ENSMUSG00000028111	8.06696	1.45686	0.962395	1.51378	0.130081	0.214293	Ctsk	-2.93577	21.0045	2.7451	0.130691
ENSMUSG00000037824	26.0951	7.49122	3.8873	1.9271	0.0539673	0.104816	Tspan14	3.1065	20.8897	179.921	8.6129
ENSMUSG00000053044	4.67427	3.07396	1.54186	1.99367	0.0461877	0.0921194	Cd8b1	-1.30004	20.7351	8.42083	0.406115
ENSMUSG00000028441	2.65819	-2.44682	2.20553	-1.1094	0.267256	NA	1110017D15Rik	-6.81654	20.6736	0.183414	0.00887191
ENSMUSG00000046814	4.61229	-1.50634	1.59581	-0.943932	0.345204	0.45836	Gchfr	-5.86748	20.5511	0.352003	0.0171282
ENSMUSG00000020930	4.40807	-0.150307	1.41425	-0.106281	0.91536	0.942351	Ccdc103	-4.4822	20.1386	0.901059	0.0447429
ENSMUSG00000090129	4.95852	-4.32609	2.07147	-2.08842	0.0367603	0.0763232	Olfr287	-8.63704	19.8485	0.049856	0.00251183
ENSMUSG00000027670	9.62636	-0.237747	0.985639	-0.241211	0.809392	0.863258	Ocstamp	-4.53858	19.7098	0.848069	0.0430279
ENSMUSG00000024317	7.1994	-2.74059	1.60244	-1.71026	0.0872181	0.154113	Rnf138	-7.04089	19.7024	0.149623	0.00759419
ENSMUSG00000030004	4.46365	-2.46054	1.59101	-1.54653	0.121977	0.203313	Nat8	-6.75236	19.587	0.181678	0.00927548
ENSMUSG00000033918	23.6783	4.44613	2.93654	1.51407	0.130007	0.21423	Parl	0.163069	19.4684	21.7981	1.11967
ENSMUSG00000078974	46.5656	3.95026	0.583347	6.77171	1.27267e-11	1.64063e-10	Sec61g	-0.31435	19.221	15.4578	0.804213
ENSMUSG00000032845	8.46901	-0.174319	0.936895	-0.186061	0.852397	0.895849	Alpk2	-4.43299	19.1421	0.886185	0.0462952
ENSMUSG00000026023	3.7384	-1.85865	1.6355	-1.13644	0.255774	0.363917	Cdk15	-6.11653	19.1315	0.275735	0.0144126
ENSMUSG00000066677	3.29537	-0.386488	1.54725	-0.249791	0.802749	NA	Ifi208	-4.63615	19.0229	0.764989	0.0402142
ENSMUSG00000025432	2.62435	-1.59965	2.47241	-0.646999	0.517633	NA	Avil	-5.81794	18.6137	0.329958	0.0177266
ENSMUSG00000044034	3.80115	-0.231056	1.41909	-0.16282	0.87066	0.909908	Npb	-4.44777	18.5934	0.852011	0.0458233
ENSMUSG00000050737	6.9896	-0.117097	1.18759	-0.0986003	0.921456	0.946632	Ptges	-4.32827	18.5221	0.922041	0.0497806
ENSMUSG00000028167	6.46446	-1.38083	1.15885	-1.19155	0.233438	0.338691	Bdh2	-5.5328	17.7773	0.383998	0.0216004
ENSMUSG00000027368	3.86418	0.414675	1.35746	0.305478	0.760002	0.828105	Dusp2	-3.71891	17.5523	1.333	0.0759444
ENSMUSG00000058183	3.61543	-0.346844	1.41585	-0.244973	0.806478	NA	Mmel1	-4.4229	16.8661	0.786302	0.0466202
ENSMUSG00000036390	29.1264	-2.2119	0.680976	-3.24814	0.00116163	0.00396367	Gadd45a	-6.27901	16.7618	0.215849	0.0128774
ENSMUSG00000022760	9.30903	3.62934	1.4023	2.58814	0.00964963	0.0249449	Thap7	-0.435441	16.7349	12.3749	0.739468
ENSMUSG00000055137	5.07568	-2.88331	1.54062	-1.87153	0.0612716	0.115876	Sugct	-6.94803	16.7341	0.135531	0.00809908
ENSMUSG00000017969	1.70535	-3.23145	2.85138	-1.13329	0.25709	NA	Ptgis	-7.29612	16.7335	0.106472	0.0063628
ENSMUSG00000003477	4.58673	-0.871905	1.31179	-0.66467	0.506262	0.615056	Inmt	-4.9175	16.5138	0.546425	0.033089
ENSMUSG00000053783	9.55575	-0.219244	0.928274	-0.236185	0.813289	0.866312	1700016K19Rik	-4.25605	16.4135	0.859015	0.0523359
ENSMUSG00000040473	1.40646	-3.11773	3.07581	-1.01363	0.31076	NA	Cfap69	-7.14198	16.2712	0.115205	0.00708027
ENSMUSG00000099655	4.30439	0.236261	1.2591	0.187643	0.851156	0.895144	NA	-3.78773	16.2683	1.17794	0.0724066
ENSMUSG00000043687	33.7098	0.0785618	0.539557	0.145604	0.884234	0.92013	1190005I06Rik	-3.93192	16.1167	1.05596	0.0655201
ENSMUSG00000035152	1715.61	3.68628	0.215241	17.1263	9.44519e-66	1.42053e-63	Ap2b1	-0.321583	16.0875	12.873	0.800192
ENSMUSG00000000690	5.29623	-1.75375	1.31238	-1.33631	0.181447	0.278898	Hoxb6	-5.76035	16.0734	0.29653	0.0184485
ENSMUSG00000024371	16.7777	2.79205	0.894414	3.12165	0.00179839	0.00581663	C2	-1.20949	16.0171	6.92614	0.432421
ENSMUSG00000064281	6.33052	0.38331	1.2441	0.308102	0.758005	0.826562	NA	-3.59995	15.8154	1.30433	0.0824722
ENSMUSG00000029089	3.58267	-3.7041	2.76905	-1.33768	0.181002	NA	Pacrgl	-7.68696	15.8111	0.0767284	0.00485282
ENSMUSG00000090996	41.7266	0.97186	2.08199	0.466795	0.640647	0.731429	NA	-3.0018	15.7105	1.96137	0.124844
ENSMUSG00000014303	8.8138	0.470495	0.94669	0.496989	0.619197	0.712696	Glis2	-3.50144	15.6918	1.38558	0.0883002
ENSMUSG00000031586	52.8648	5.83842	0.889142	6.56635	5.15629e-11	6.24236e-10	Rbpms	1.8839	15.5035	57.2189	3.69072
ENSMUSG00000024381	1104.5	3.29731	0.220998	14.9201	2.43994e-50	2.1521e-48	Bin1	-0.645779	15.3811	9.83078	0.639148
ENSMUSG00000020940	5.09119	-0.0538965	1.24412	-0.0433211	0.965446	0.976601	1700023F06Rik	-3.99478	15.3576	0.963331	0.0627266
ENSMUSG00000047844	79.547	-2.01848	0.402051	-5.02048	5.15439e-07	3.61856e-06	Bex4	-5.95526	15.314	0.246817	0.0161171
ENSMUSG00000020658	54.4266	-0.257476	0.473862	-0.543356	0.586885	0.684809	Efr3b	-4.18563	15.2227	0.83655	0.0549542
ENSMUSG00000044243	4.50336	0.293059	1.34784	0.217428	0.827875	0.877545	Bhlha9	-3.63505	15.2223	1.22524	0.0804896
ENSMUSG00000074228	6.86784	3.95323	1.37122	2.883	0.00393908	0.0115639	NA	0.0398167	15.068	15.4897	1.02798
ENSMUSG00000078552	4.51061	-0.895172	1.37401	-0.651504	0.514721	0.622622	Dcdc2b	-4.80672	15.0485	0.537683	0.0357301
ENSMUSG00000047420	3.81992	-3.34767	1.90565	-1.75671	0.0789679	0.142169	Fam180a	-7.2459	14.9102	0.0982314	0.00658819
ENSMUSG00000020079	32.5004	2.14547	0.627703	3.41797	0.00063089	0.00231715	Supv3l1	-1.7481	14.8621	4.42437	0.297694
ENSMUSG00000040680	4.6655	-0.976999	1.32649	-0.736531	0.461408	0.573995	Kremen2	-4.85948	14.7483	0.508035	0.034447
ENSMUSG00000038775	11.9398	3.1841	0.945455	3.3678	0.000757712	0.00272076	Vill	-0.684218	14.6043	9.08888	0.622343
ENSMUSG00000079364	2.55763	-3.00884	2.10336	-1.4305	0.152575	NA	Gm3558	-6.86837	14.5155	0.124236	0.00855885
ENSMUSG00000097803	13.2308	2.94423	1.2489	2.35746	0.0184002	0.0431017	NA	-0.903845	14.4008	7.69667	0.53446
ENSMUSG00000000120	4.64618	-0.325821	1.23995	-0.262769	0.792729	0.851369	Ngfr	-4.17322	14.394	0.797844	0.0554289
ENSMUSG00000094130	9.14174	1.51093	1.40187	1.0778	0.281124	0.39102	NA	-2.33062	14.3358	2.84994	0.198798
ENSMUSG00000058099	232.237	10.2696	1.11073	9.24588	2.3331e-20	5.97591e-19	Nfam1	6.4299	14.3177	1234.43	86.2171
ENSMUSG00000073418	201.921	4.02953	0.35683	11.2926	1.42811e-29	6.00471e-28	C4b	0.205095	14.1667	16.3308	1.15276
ENSMUSG00000032763	32.5553	2.43187	0.673666	3.60991	0.000306308	0.00121436	Ilvbl	-1.37912	14.0354	5.39592	0.384452
ENSMUSG00000030413	2.15619	-2.67149	2.24182	-1.19166	0.233394	NA	Pglyrp1	-6.45631	13.7831	0.156965	0.0113882
ENSMUSG00000001249	6.17275	5.3812	1.67892	3.20515	0.0013499	0.00452319	Hpn	1.60685	13.6834	41.6776	3.04585
ENSMUSG00000022415	1878.88	3.86265	0.234405	16.4786	5.232e-61	6.74469e-59	Syngr1	0.105609	13.5202	14.547	1.07595
ENSMUSG00000045498	4.17061	-2.49337	1.62141	-1.53778	0.124102	0.206415	Pcdhb3	-6.23864	13.4103	0.177591	0.0132429
ENSMUSG00000012017	22.688	2.41421	0.676396	3.56922	0.000358044	0.00139403	Scarf2	-1.32951	13.3959	5.33027	0.397903
ENSMUSG00000030123	61.5897	1.67624	0.410798	4.08044	4.49505e-05	0.000214617	Plxnd1	-2.06717	13.393	3.19593	0.238626
ENSMUSG00000032323	4.56621	0.57612	1.50645	0.382436	0.702138	0.781998	Cyp11a1	-3.16163	13.3406	1.49083	0.111752
ENSMUSG00000031520	3.25754	-2.70689	2.04375	-1.32447	0.185346	NA	Vegfc	-6.43363	13.2392	0.15316	0.0115687
ENSMUSG00000038022	4.31083	0.710419	1.32831	0.534828	0.592769	0.690064	Mindy4	-3.01051	13.1859	1.63628	0.124093
ENSMUSG00000101502	6.18987	5.95607	1.7604	3.38335	0.00071606	0.00258863	NA	2.24028	13.1391	62.0807	4.72489
ENSMUSG00000042167	5.88982	-4.41819	1.68983	-2.61458	0.0089337	0.0233689	Tent2	-8.11832	12.9972	0.0467726	0.00359867
ENSMUSG00000037708	3.91184	-3.78154	1.92325	-1.96623	0.0492725	0.0972109	Spag6	-7.45948	12.7988	0.072718	0.00568161
ENSMUSG00000000409	3.0742	-0.750717	1.75649	-0.427396	0.669091	NA	Lck	-4.42776	12.7909	0.594308	0.0464635
ENSMUSG00000036862	5.86863	0.232299	1.28757	0.180417	0.856825	0.899295	Dchs1	-3.43653	12.7183	1.17471	0.0923635
ENSMUSG00000012114	39.7623	1.71697	0.494603	3.47142	0.000517714	0.00193911	Med15	-1.92871	12.5158	3.28746	0.262665
ENSMUSG00000073207	2.17052	-2.47488	2.1748	-1.13798	0.255128	NA	Ccdc160	-6.11672	12.4825	0.179881	0.0144107
ENSMUSG00000031737	2.95595	-3.28614	2.0843	-1.57661	0.114885	NA	Irx5	-6.92189	12.4299	0.102512	0.00824716
ENSMUSG00000043822	11.2749	-0.297936	0.955177	-0.311917	0.755104	0.824472	Adamtsl5	-3.92675	12.3704	0.813415	0.0657552
ENSMUSG00000070972	42.3017	2.99491	1.15621	2.59029	0.00958963	0.0248064	Dnajc25	-0.633057	12.3631	7.97182	0.644808
ENSMUSG00000064202	2.62827	-0.561477	1.88353	-0.298098	0.765629	NA	4430402I18Rik	-4.18939	12.3626	0.677608	0.054811
ENSMUSG00000020108	350.151	3.2906	0.246904	13.3274	1.60336e-40	1.06869e-38	Ddit4	-0.336735	12.3577	9.7852	0.791831
ENSMUSG00000040564	30.0761	1.37522	0.720359	1.90908	0.0562522	0.108428	Apoc1	-2.25124	12.3502	2.59408	0.210044
ENSMUSG00000037593	5.15017	1.13171	1.2	0.943096	0.345632	0.458614	Rskr	-2.49267	12.3324	2.19119	0.177677
ENSMUSG00000064360	116.829	-5.33576	1.42281	-3.75016	0.00017672	0.000739075	ND3	-8.95931	12.3252	0.0247614	0.002009
ENSMUSG00000017718	21.8051	1.93118	0.672164	2.87308	0.00406493	0.0118685	Afmid	-1.69194	12.3216	3.81367	0.30951
ENSMUSG00000022130	4.12704	2.34445	2.34256	1.00081	0.316921	0.429406	Tgds	-1.26381	12.1953	5.07866	0.416444
ENSMUSG00000034259	35.6487	2.0743	1.26975	1.63363	0.102336	0.176208	Exosc4	-1.50499	11.9529	4.21139	0.352332
ENSMUSG00000039519	7.7956	-4.39814	1.52057	-2.89243	0.00382271	0.0112617	Cyp7b1	-7.97544	11.9364	0.0474273	0.00397332
ENSMUSG00000020805	3.86564	0.561686	1.61538	0.347712	0.728057	0.80339	Slc13a5	-3.01125	11.9003	1.47599	0.124029
ENSMUSG00000019890	7.64326	-3.99431	1.47769	-2.70307	0.00687022	0.0186691	Nts	-7.56422	11.8754	0.0627471	0.00528377
ENSMUSG00000006522	43.8423	0.0181247	0.504947	0.0358943	0.971367	0.981152	Itih3	-3.54965	11.8579	1.01264	0.085398
ENSMUSG00000026198	45.0194	2.60437	0.607398	4.28776	1.80488e-05	9.41442e-05	Abcb6	-0.954012	11.781	6.08127	0.516195
ENSMUSG00000036061	6.08281	3.5386	1.96255	1.80307	0.0713779	0.1311	Smug1	-0.015865	11.749	11.6205	0.989063
ENSMUSG00000031555	20.216	5.6225	1.56218	3.59914	0.000319273	0.00125688	Adam9	2.07603	11.684	49.2653	4.21646
ENSMUSG00000020868	66.8156	0.880522	0.397675	2.21417	0.0268167	0.0588344	Xylt2	-2.6516	11.5684	1.84104	0.159144
ENSMUSG00000035824	9.68611	2.18209	1.21213	1.80021	0.0718273	0.131801	Tk2	-1.3408	11.4946	4.5381	0.394802
ENSMUSG00000034664	6.81451	0.38766	1.10055	0.352242	0.724657	0.80024	Itga2b	-3.1308	11.4594	1.30827	0.114166
ENSMUSG00000085042	15.3276	1.0159	0.737365	1.37774	0.168283	0.262557	Abhd11os	-2.49517	11.4009	2.02216	0.177369
ENSMUSG00000054196	24.8751	-2.70274	0.748962	-3.60864	0.000307802	0.00121985	Cthrc1	-6.206	11.3393	0.153602	0.0135459
ENSMUSG00000044345	23.64	2.91641	0.691011	4.22049	2.43769e-05	0.000123527	Marveld1	-0.585506	11.3287	7.54963	0.666415
ENSMUSG00000031382	2.36894	-2.95513	2.15281	-1.37269	0.16985	NA	Asb11	-6.45541	11.3159	0.128949	0.0113954
ENSMUSG00000031214	211.045	6.81317	0.661439	10.3005	7.00805e-25	2.27732e-23	Ophn1	3.31541	11.2962	112.452	9.95492
ENSMUSG00000052135	21.9795	1.67653	0.639782	2.62047	0.00878076	0.0230544	Foxo6	-1.81744	11.2665	3.19659	0.283724
ENSMUSG00000009246	2.73731	-2.62006	2.15321	-1.21682	0.223673	NA	Trpm5	-6.09599	11.1265	0.16266	0.0146192
ENSMUSG00000050052	15.5168	0.0718138	0.82479	0.0870693	0.930616	0.953455	Tdrp	-3.3988	11.0856	1.05104	0.0948114
ENSMUSG00000063696	12.5111	3.14363	3.95565	0.794718	0.426778	0.539613	NA	-0.324981	11.0702	8.83744	0.798309
ENSMUSG00000080059	4.64397	1.12373	1.25863	0.892823	0.371952	0.485466	Rps19-ps3	-2.34123	11.0422	2.1791	0.197343
ENSMUSG00000053647	2.1973	-1.83542	2.68443	-0.683726	0.494148	NA	Gper1	-5.29993	11.0388	0.280211	0.0253841
ENSMUSG00000024610	351.748	5.20612	0.27898	18.6613	1.02258e-77	2.22147e-75	Cd74	1.74395	11.0209	36.9146	3.34951
ENSMUSG00000025784	20.0217	-0.0491394	0.753106	-0.065249	0.947976	0.964768	Clec3b	-3.50474	10.9708	0.966513	0.0880986
ENSMUSG00000009927	3.55438	-0.7812	1.45908	-0.535407	0.592368	NA	Rps25	-4.23002	10.9194	0.581882	0.053289
ENSMUSG00000031595	4.59229	-1.56289	1.5099	-1.0351	0.300623	0.412421	Pdgfrl	-5.001	10.8386	0.338473	0.0312284
ENSMUSG00000066440	5.61282	4.23077	1.72865	2.44744	0.0143875	0.0350165	Zfyve26	0.796246	10.8117	18.7753	1.73658
ENSMUSG00000028597	11.241	0.282892	0.872717	0.324151	0.745824	0.816771	Gpx7	-3.14213	10.7408	1.21663	0.113272
ENSMUSG00000002108	7.40389	0.419575	1.02722	0.408458	0.682937	0.767389	Nr1h3	-3.00541	10.7405	1.33753	0.124532
ENSMUSG00000032085	5.32355	0.401157	1.21067	0.33135	0.74038	0.812479	Tagln	-3.01718	10.6911	1.32057	0.12352
ENSMUSG00000033318	14.7492	2.06549	0.779434	2.64999	0.00804935	0.0213636	Gstt2	-1.34893	10.6621	4.18577	0.392583
ENSMUSG00000053746	11.8745	0.0360289	0.818405	0.0440233	0.964886	0.976268	Ptrh1	-3.37754	10.6558	1.02529	0.0962187
ENSMUSG00000026712	11.0625	4.11433	1.15768	3.55394	0.000379499	0.00147317	Mrc1	0.708277	10.6005	17.3196	1.63385
ENSMUSG00000032377	4.65922	-3.88205	1.89368	-2.05	0.0403641	0.0824358	Plscr4	-7.28802	10.5999	0.0678244	0.00639862
ENSMUSG00000029417	4.61988	3.57853	1.66044	2.15518	0.0311481	0.0664844	Cxcl9	0.191567	10.4611	11.9466	1.142
ENSMUSG00000038295	5.03129	-1.0549	1.26082	-0.836682	0.402771	0.515651	Atg9b	-4.44079	10.4533	0.481329	0.0460457
ENSMUSG00000060591	32.3301	2.67472	0.572296	4.67367	2.95866e-06	1.80395e-05	Ifitm2	-0.683878	10.2575	6.38516	0.62249
ENSMUSG00000026805	7.97398	-9.28989e-05	1.06118	-8.75428e-05	0.99993	0.999948	Barhl1	-3.35211	10.2108	0.999936	0.0979296
ENSMUSG00000043557	36.984	2.29753	0.596129	3.85408	0.000116166	0.000508299	Mdga1	-1.05288	10.1993	4.91614	0.482006
ENSMUSG00000021534	2.15811	-3.74646	2.60387	-1.4388	0.150206	NA	1700001L19Rik	-7.09544	10.1892	0.0745079	0.00731241
ENSMUSG00000006958	4.81235	0.851061	1.36098	0.625331	0.531754	0.637181	Chrd	-2.48551	10.102	1.80383	0.178562
ENSMUSG00000060402	30.5823	1.90507	0.662905	2.87382	0.00405542	0.0118462	Chst8	-1.41959	10.0189	3.74527	0.373819
ENSMUSG00000066979	63.259	0.494501	0.450452	1.09779	0.272297	0.382239	Bub3	-2.82838	10.0066	1.40883	0.14079
ENSMUSG00000049122	2.90491	-2.87733	2.12487	-1.35412	0.175698	NA	Frmd3	-6.18837	9.92481	0.136093	0.0137124
ENSMUSG00000037610	4.82232	-3.62893	1.77374	-2.04592	0.040764	0.0830501	Kcnmb2	-6.93384	9.88276	0.080832	0.00817909
ENSMUSG00000025216	4.02174	-0.929024	1.55475	-0.597538	0.550148	0.653085	Lbx1	-4.23389	9.8824	0.525213	0.0531463
ENSMUSG00000032525	76.2806	3.48543	0.712477	4.89199	9.9824e-07	6.67256e-06	Nktr	0.187903	9.83227	11.2	1.13911
ENSMUSG00000029816	6.61116	1.55063	1.10317	1.40561	0.159839	0.252553	Gpnmb	-1.7434	9.80851	2.92945	0.298664
ENSMUSG00000030862	4.13553	-0.515044	1.35556	-0.379949	0.703983	0.783309	Cpxm2	-3.80833	9.80344	0.699772	0.0713802
ENSMUSG00000028188	7.4974	-0.638786	1.0491	-0.60889	0.542598	0.646346	Spata1	-3.91902	9.71515	0.642253	0.0661084
ENSMUSG00000040097	6.55107	-0.905163	1.14187	-0.792701	0.427952	0.540816	Flywch1	-4.18168	9.69015	0.533972	0.0551046
ENSMUSG00000028459	21.4753	6.6573	1.25506	5.30437	1.13064e-07	8.8898e-07	Cd72	3.38303	9.67504	100.936	10.4326
ENSMUSG00000083061	84.4274	2.15119	2.00835	1.07112	0.284116	0.39434	NA	-1.11865	9.6454	4.44193	0.460524
ENSMUSG00000023274	18.2376	1.64055	0.687637	2.38578	0.0170428	0.0405125	Cd4	-1.61933	9.57901	3.11785	0.325488
ENSMUSG00000031297	5.52969	-3.97728	1.71802	-2.31504	0.0206107	0.0473345	Slc7a3	-7.23473	9.56295	0.0634922	0.00663939
ENSMUSG00000031825	6.76688	0.245369	1.11207	0.220642	0.825371	0.875434	Crispld2	-3.0088	9.54117	1.1854	0.12424
ENSMUSG00000020218	2.67944	-2.46238	1.85882	-1.3247	0.185271	NA	Wif1	-5.71631	9.53957	0.181447	0.0190204
ENSMUSG00000032291	3.50956	-3.46716	1.95356	-1.77479	0.0759326	NA	Crabp1	-6.71842	9.52198	0.0904237	0.00949631
ENSMUSG00000046550	9.84997	-1.74682	1.00371	-1.74036	0.081796	0.146228	Spin2c	-4.99069	9.47331	0.297959	0.0314524
ENSMUSG00000059412	12.1565	1.00087	0.818003	1.22355	0.221123	0.32494	Fxyd2	-2.21869	9.31502	2.0012	0.214836
ENSMUSG00000032492	6.68628	-5.36775	1.80637	-2.97156	0.0029629	0.00904914	Pth1r	-8.58704	9.31329	0.0242184	0.00260041
ENSMUSG00000000530	125.96	4.80513	0.448105	10.7232	7.91884e-27	2.84957e-25	Acvrl1	1.58978	9.28789	27.9568	3.01003
ENSMUSG00000042510	5.25074	0.367792	1.23404	0.298039	0.765674	0.831755	AA986860	-2.83858	9.23028	1.29038	0.139798
ENSMUSG00000004473	8.84804	-0.22313	0.967597	-0.230603	0.817623	0.869193	Clec11a	-3.42683	9.21318	0.856705	0.0929869
ENSMUSG00000024650	10.3412	-0.165454	0.862791	-0.191766	0.847925	0.892669	Slc22a6	-3.36878	9.21082	0.891648	0.0968043
ENSMUSG00000019027	3.30206	-0.167431	1.43528	-0.116654	0.907135	NA	Dnah1	-3.36939	9.20206	0.890427	0.0967639
ENSMUSG00000081984	4.60441	-1.26037	1.31231	-0.960423	0.336842	0.449698	Dnajb3	-4.46157	9.19723	0.417436	0.0453872
ENSMUSG00000038217	4.55324	3.37409	1.63177	2.06775	0.0386639	0.0795452	Tlcd2	0.17428	9.18839	10.3682	1.1284
ENSMUSG00000059555	40.5203	6.57554	1.01672	6.46742	9.96913e-11	1.17065e-09	Tor4a	3.39287	9.07989	95.3753	10.504
ENSMUSG00000055805	92.791	4.3435	1.89893	2.28734	0.0221761	0.0502508	Fmnl1	1.16315	9.06525	20.3013	2.23946
ENSMUSG00000020928	5.06088	-1.76448	1.33335	-1.32334	0.185721	0.284085	Higd1b	-4.9426	9.05123	0.294332	0.0325184
ENSMUSG00000021278	7.20472	-3.36975	1.78116	-1.89189	0.0585062	0.111872	Amn	-6.54443	9.02972	0.0967397	0.0107135
ENSMUSG00000028414	65.7467	-0.753363	0.460114	-1.63734	0.10156	0.175128	Fktn	-3.921	8.98574	0.593219	0.0660178
ENSMUSG00000004814	15.5234	8.14793	1.50402	5.41743	6.04618e-08	4.98438e-07	Ccl24	4.98616	8.94922	283.642	31.6946
ENSMUSG00000074178	7.67704	1.10013	1.15908	0.949145	0.342547	0.455551	NA	-2.06022	8.94052	2.14375	0.239779
ENSMUSG00000021662	7.23818	-5.38414	1.77388	-3.03523	0.00240348	0.00753683	Arhgef28	-8.54211	8.92572	0.0239448	0.00268268
ENSMUSG00000029468	41.9772	6.89968	0.965526	7.14603	8.9324e-13	1.29365e-11	P2rx7	3.74888	8.8815	119.402	13.4439
ENSMUSG00000044816	7.95255	-1.84875	1.23837	-1.49289	0.135465	0.22139	D630023F18Rik	-4.99689	8.86512	0.277632	0.0313173
ENSMUSG00000035578	4.40613	0.856695	1.32752	0.645333	0.518711	0.625836	Iqcg	-2.28484	8.8246	1.81089	0.205209
ENSMUSG00000006019	44.1051	3.92523	0.529333	7.41543	1.2123e-13	1.90893e-12	Dhx34	0.785158	8.81568	15.1919	1.72328
ENSMUSG00000029151	116.179	1.14818	2.13973	0.536599	0.591545	0.688912	Slc30a3	-1.98743	8.78845	2.21634	0.252188
ENSMUSG00000031740	9.66891	7.46927	1.66434	4.48784	7.19502e-06	4.05013e-05	Mmp2	4.33614	8.77338	177.205	20.198
ENSMUSG00000024220	58.4328	1.37962	0.460647	2.99496	0.00274482	0.00848023	Zfp523	-1.74603	8.72798	2.602	0.298122
ENSMUSG00000043664	17.8079	7.37492	1.43475	5.14023	2.74407e-07	2.04126e-06	Tmem221	4.25028	8.72192	165.986	19.0309
ENSMUSG00000020085	13.7977	0.881421	0.812959	1.08421	0.27827	0.38834	Aifm2	-2.23277	8.65895	1.84219	0.21275
ENSMUSG00000032193	13.4329	-3.35741	1.50681	-2.22816	0.0258701	0.0570991	Ldlr	-6.46653	8.6286	0.0975707	0.0113078
ENSMUSG00000021485	4.24315	1.89592	1.34547	1.40911	0.158801	0.251369	Mxd3	-1.20966	8.6074	3.72159	0.43237
ENSMUSG00000036751	9.10937	1.69292	1.21023	1.39884	0.161861	0.254885	Cox6b1	-1.3966	8.51211	3.23309	0.379823
ENSMUSG00000020641	7.6286	3.42022	1.30674	2.61738	0.00886079	0.0232385	Rsad2	0.3312	8.5092	10.7051	1.25806
ENSMUSG00000032754	20.03	4.03264	1.00681	4.00537	6.19196e-05	0.000286201	Slc8b1	0.954343	8.44619	16.3661	1.9377
ENSMUSG00000029632	7.80828	0.150687	1.91212	0.078806	0.937187	0.957938	Ndufa4	-2.90645	8.32318	1.1101	0.133374
ENSMUSG00000022210	21.2801	1.67178	0.638928	2.61655	0.0088824	0.0232717	Dhrs4	-1.38073	8.29658	3.18609	0.384024
ENSMUSG00000027364	169.934	-0.461617	0.290346	-1.58989	0.11186	0.189684	Usp50	-3.48207	8.11423	0.726172	0.0894936
ENSMUSG00000051159	16.5142	-1.45618	0.804529	-1.80998	0.0702994	0.129584	Cited1	-4.47593	8.11029	0.364457	0.0449377
ENSMUSG00000055407	9.74304	0.665029	1.35993	0.489018	0.624829	0.717278	Map6	-2.33643	8.00812	1.5856	0.197999
ENSMUSG00000024164	42.1445	2.92733	1.05776	2.76748	0.0056492	0.0158126	C3	-0.0618394	7.94018	7.60703	0.958042
ENSMUSG00000033809	29.9083	1.05358	0.583177	1.80663	0.0708203	0.130387	Alg3	-1.93059	7.91272	2.07568	0.262322
ENSMUSG00000039997	4.26327	1.30601	1.44199	0.905701	0.365094	0.478653	Ifi203	-1.67568	7.89912	2.47257	0.313018
ENSMUSG00000073424	14.7764	-0.522721	0.822318	-0.635668	0.524993	0.631661	Cyp4f15	-3.49551	7.85053	0.696058	0.0886638
ENSMUSG00000047591	6.05849	-0.924304	1.38497	-0.667382	0.504528	0.613442	Mafa	-3.89046	7.81452	0.526935	0.0674302
ENSMUSG00000041907	13.2962	-0.54095	1.21832	-0.444012	0.657034	0.745999	Gpr45	-3.50686	7.81316	0.687318	0.0879693
ENSMUSG00000031887	40.8956	2.46261	0.488391	5.0423	4.59959e-07	3.26819e-06	Tradd	-0.502235	7.80744	5.51215	0.706012
ENSMUSG00000001229	31.0084	2.47986	1.19266	2.07926	0.0375934	0.0777107	Dpp9	-0.483212	7.79783	5.57844	0.715383
ENSMUSG00000026271	7.03921	6.09289	1.6259	3.7474	0.000178676	0.000746989	Gpr35	3.13291	7.78112	68.2561	8.77202
ENSMUSG00000003873	262.681	3.77184	2.07252	1.81994	0.0687689	0.127184	Bax	0.812591	7.77721	13.6596	1.75636
ENSMUSG00000036281	21.0696	2.39862	0.734829	3.26419	0.00109779	0.00377879	Snapc4	-0.555513	7.74965	5.27298	0.680415
ENSMUSG00000039242	4.38618	2.36952	1.59648	1.48421	0.137752	0.224379	B3galnt2	-0.572443	7.68454	5.16768	0.672477
ENSMUSG00000078747	40.0514	0.570901	0.499544	1.14284	0.253103	0.361211	Gm20878	-2.35349	7.59154	1.48545	0.195672
ENSMUSG00000028023	2.60943	-3.14093	2.10478	-1.49228	0.135625	NA	Pitx2	-6.05549	7.54001	0.113367	0.0150354
ENSMUSG00000060969	9.89155	-0.431516	1.03279	-0.417817	0.676081	0.7618	Irx1	-3.34087	7.51282	0.741482	0.0986956
ENSMUSG00000012126	10.7934	-0.261354	0.862825	-0.302905	0.761963	0.829336	Ubxn11	-3.16675	7.49226	0.834305	0.111356
ENSMUSG00000015619	3.22369	-1.00941	1.78698	-0.564868	0.572164	NA	Gata3	-3.91438	7.49004	0.496751	0.0663215
ENSMUSG00000090877	36.1218	0.62397	0.605284	1.03087	0.302601	0.414504	Hspa1b	-2.28038	7.48678	1.54111	0.205844
ENSMUSG00000005124	1.74787	-3.33478	2.82293	-1.18132	0.237475	NA	Ccn4	-6.23824	7.48216	0.0991131	0.0132466
ENSMUSG00000015377	3.51382	-0.816917	1.45302	-0.562219	0.573967	NA	Dennd6b	-3.71839	7.47191	0.567654	0.0759717
ENSMUSG00000003161	309.652	3.6606	0.253834	14.4212	3.80466e-47	3.03622e-45	Sri	0.759418	7.4704	12.646	1.69281
ENSMUSG00000039787	5.43799	2.20081	1.3177	1.67019	0.0948814	0.165412	Cercam	-0.699239	7.4645	4.59736	0.615897
ENSMUSG00000019194	1145.77	1.70736	1.23605	1.38131	0.167183	0.261358	Scn1b	-1.18513	7.42554	3.26563	0.439784
ENSMUSG00000000126	14.244	-0.499181	0.807067	-0.618512	0.536238	0.640395	Wnt9a	-3.38991	7.41643	0.707508	0.0953974
ENSMUSG00000024227	3.80477	-2.91367	2.01299	-1.44744	0.147775	0.237115	Pdzph1	-5.8009	7.39848	0.132708	0.0179372
ENSMUSG00000049036	42.4106	0.0546785	0.645769	0.0846719	0.932522	0.954824	Tmem121	-2.82921	7.38139	1.03863	0.140709
ENSMUSG00000030314	105.669	2.5501	0.423432	6.02246	1.71783e-09	1.71068e-08	Atg7	-0.328209	7.35288	5.85675	0.796525
ENSMUSG00000024907	15.8231	-0.537879	0.771201	-0.697456	0.485517	0.596352	Gal	-3.41333	7.33835	0.688783	0.0938608
ENSMUSG00000015354	15.5426	-3.29213	1.00992	-3.2598	0.00111491	0.00382876	Pcolce2	-6.16374	7.31881	0.102087	0.0139486
ENSMUSG00000022000	19.2607	-7.20782	1.44286	-4.9955	5.86843e-07	4.06631e-06	Zc3h13	-10.0772	7.30771	0.0067644	0.000925653
ENSMUSG00000024376	4.9675	-1.59397	1.28979	-1.23584	0.216518	0.320259	Epb41l4a	-4.46168	7.29904	0.331259	0.0453839
ENSMUSG00000012123	7.04259	1.93789	1.60616	1.20654	0.227611	0.332144	Crybg2	-0.928764	7.29371	3.83144	0.525308
ENSMUSG00000048489	4.17058	-2.90557	1.81957	-1.59685	0.110299	0.187437	Depp1	-5.76742	7.26947	0.133455	0.0183583
ENSMUSG00000004864	4.47998	-4.27436	2.05707	-2.07789	0.0377199	0.0779173	Mapk13	-7.12501	7.21329	0.0516762	0.00716403
ENSMUSG00000027253	5.15196	2.59677	1.29737	2.00156	0.0453315	0.0907386	Lrp4	-0.247829	7.18309	6.04933	0.842163
ENSMUSG00000034893	17.4292	0.848272	0.759079	1.1175	0.26378	0.372439	Cog3	-1.98064	7.1054	1.80034	0.253377
ENSMUSG00000023345	41.2962	1.38618	0.677473	2.04611	0.0407459	0.0830276	Poc1a	-1.43922	7.0881	2.61386	0.368767
ENSMUSG00000029436	140.651	0.202762	0.377823	0.536659	0.591503	0.688912	Mmp17	-2.62154	7.08272	1.1509	0.162494
ENSMUSG00000037020	5.73569	5.34584	1.65119	3.23758	0.0012055	0.00409311	Wdr62	2.5243	7.06921	40.6686	5.75292
ENSMUSG00000002981	242.709	2.14477	0.322051	6.65973	2.74326e-11	3.4199e-10	Clptm1	-0.673667	7.05399	4.42222	0.626911
ENSMUSG00000028862	9.45238	-1.1842	1.05101	-1.12672	0.259859	0.368236	Map3k6	-3.99969	7.03959	0.440069	0.0625135
ENSMUSG00000026383	4.02799	0.31909	1.6165	0.197396	0.843518	0.889386	Epb41l5	-2.49342	7.02504	1.24754	0.177585
ENSMUSG00000027134	8.45739	0.171541	1.01632	0.168787	0.865964	0.906298	Lpcat4	-2.64043	7.02244	1.12626	0.16038
ENSMUSG00000057469	11.4117	-5.30589	3.91331	-1.35586	0.175145	0.271059	E2f6	-8.1027	6.94903	0.0252795	0.00363784
ENSMUSG00000032494	3.09168	-2.63219	1.8161	-1.44936	0.147236	NA	Tdgf1	-5.42612	6.93518	0.161299	0.0232581
ENSMUSG00000024187	38.3433	0.937543	0.592603	1.58208	0.113632	0.191939	Fam234a	-1.8529	6.91841	1.91526	0.276836
ENSMUSG00000031489	2.44822	-2.97107	2.15805	-1.37674	0.168594	NA	Adrb3	-5.76138	6.91779	0.127532	0.0184353
ENSMUSG00000025464	83.9368	3.95698	0.419857	9.42459	4.3177e-21	1.16707e-19	Paox	1.16988	6.90238	15.5299	2.24994
ENSMUSG00000002289	5.5175	0.0513082	1.14375	0.0448596	0.964219	0.976048	Angptl4	-2.7316	6.88238	1.0362	0.150559
ENSMUSG00000070366	15.782	-1.01225	0.863278	-1.17256	0.240972	0.347306	Plpp4	-3.7941	6.87736	0.495774	0.0720879
ENSMUSG00000097327	13.2139	3.92094	0.935593	4.19087	2.77893e-05	0.000139136	E030030I06Rik	1.14663	6.84152	15.1468	2.21396
ENSMUSG00000049811	3.97148	-0.0713491	1.39076	-0.0513021	0.959085	0.972995	Fam161a	-2.83954	6.81251	0.951748	0.139706
ENSMUSG00000038178	130.599	3.36063	0.342948	9.79925	1.13419e-22	3.35145e-21	Slc43a2	0.593931	6.8055	10.2719	1.50935
ENSMUSG00000032380	3.06607	-2.55048	1.77867	-1.43392	0.151594	NA	Dapk2	-5.31575	6.79874	0.170698	0.0251073
ENSMUSG00000052688	35.5151	4.25537	0.764858	5.56361	2.64257e-08	2.28613e-07	Rab7b	1.49126	6.79331	19.0983	2.81134
ENSMUSG00000042073	30.8701	1.51196	0.691301	2.18713	0.0287334	0.0623052	Abhd14b	-1.24961	6.78137	2.85198	0.42056
ENSMUSG00000056648	4.38011	-2.81202	1.68593	-1.66794	0.0953281	0.166141	Hoxb8	-5.57223	6.77497	0.142396	0.021018
ENSMUSG00000043144	9.38214	-0.792652	1.04665	-0.757324	0.448856	0.561417	Aqp6	-3.54796	6.75197	0.577282	0.0854982
ENSMUSG00000034145	13.7083	-0.0682035	0.833918	-0.0817869	0.934816	0.956338	Tmem63c	-2.82322	6.75059	0.953825	0.141295
ENSMUSG00000034855	19.6661	3.15542	0.792905	3.97957	6.90395e-05	0.000314647	Cxcl10	0.40374	6.73502	8.90998	1.32293
ENSMUSG00000030284	40.553	1.82768	1.0085	1.81228	0.0699432	0.129051	Creld1	-0.913513	6.68621	3.54965	0.530891
ENSMUSG00000001151	8.23743	1.41431	2.73267	0.517554	0.60477	0.700904	Pcnt	-1.32378	6.67183	2.66531	0.399488
ENSMUSG00000033006	41.672	0.28387	2.08547	0.136118	0.891728	0.925412	Sox10	-2.44938	6.64952	1.21746	0.183089
ENSMUSG00000076498	26.5617	-0.413498	0.830173	-0.498087	0.618422	0.712084	NA	-3.14148	6.62527	0.750801	0.113324
ENSMUSG00000052798	3.03509	0.710137	2.8199	0.251831	0.801172	NA	Nup107	-2.01731	6.62284	1.63596	0.247018
ENSMUSG00000006711	9.40336	-1.47574	1.19857	-1.23125	0.21823	0.321978	D130043K22Rik	-4.19735	6.59611	0.35955	0.0545094
ENSMUSG00000040563	21.9526	0.328328	0.646403	0.50793	0.611502	0.7064	Plppr2	-2.39207	6.59055	1.25556	0.190509
ENSMUSG00000062611	3.14265	0.675624	2.08396	0.324202	0.745785	NA	NA	-2.04141	6.57518	1.59729	0.242927
ENSMUSG00000015467	5.35552	1.22075	1.19502	1.02154	0.307001	0.418916	Egfl8	-1.4914	6.55299	2.33068	0.355667
ENSMUSG00000007987	4.36187	-0.551401	2.21849	-0.248548	0.803711	0.858839	Ift22	-3.26354	6.55291	0.682357	0.10413
ENSMUSG00000039194	18.7665	-0.748115	0.691474	-1.08191	0.279291	0.389163	Rlbp1	-3.45034	6.50805	0.595381	0.0914838
ENSMUSG00000025324	4.67349	0.276394	1.2414	0.222648	0.82381	0.874343	Atp10a	-2.42218	6.49161	1.21116	0.186574
ENSMUSG00000036931	2.69793	0.11981	1.58889	0.0754053	0.939892	NA	Nfkbid	-2.56809	6.44374	1.08659	0.168628
ENSMUSG00000008496	752.622	5.72289	0.30514	18.755	1.76378e-78	4.05705e-76	Pou2f2	3.03611	6.43874	52.8154	8.20275
ENSMUSG00000028476	4.95101	-0.118729	1.25721	-0.0944386	0.924761	0.949054	Reck	-2.80179	6.42219	0.920999	0.143409
ENSMUSG00000016552	16.7306	0.375623	0.691353	0.543316	0.586912	0.684809	Foxred2	-2.30448	6.40903	1.2974	0.202433
ENSMUSG00000089762	69.0686	0.331825	0.410521	0.808304	0.418916	0.531908	Ier5l	-2.3464	6.40068	1.2586	0.196636
ENSMUSG00000029053	238.193	0.227675	0.383039	0.594391	0.552251	0.654718	Prkcz	-2.4414	6.36023	1.17095	0.184105
ENSMUSG00000028573	18.1862	-0.145154	0.848448	-0.171082	0.86416	0.905082	Fggy	-2.81233	6.35185	0.904283	0.142365
ENSMUSG00000024659	6.90134	-0.363232	1.7921	-0.202685	0.839381	0.886538	Anxa1	-3.01738	6.29476	0.777421	0.123503
ENSMUSG00000074170	26.8007	-0.947499	0.584661	-1.6206	0.105104	0.180076	Plekhf1	-3.6004	6.28932	0.518531	0.0824462
ENSMUSG00000021260	9.04513	-0.0345463	1.02787	-0.0336095	0.973189	0.982316	Hhipl1	-2.68696	6.28717	0.976339	0.155291
ENSMUSG00000025020	24.4122	-0.0945637	0.604721	-0.156376	0.875737	0.913748	Slit1	-2.74603	6.28307	0.936555	0.14906
ENSMUSG00000041193	3.5752	-0.736494	1.42293	-0.51759	0.604744	NA	Pla2g5	-3.38484	6.26947	0.600196	0.0957332
ENSMUSG00000039577	4.69315	-1.08935	1.32946	-0.819392	0.412563	0.525812	Nphp4	-3.73588	6.26159	0.469973	0.0750564
ENSMUSG00000036545	9.03452	-1.30687	0.977316	-1.33721	0.181156	0.278597	Adamts2	-3.94737	6.23545	0.404196	0.0648223
ENSMUSG00000044628	288.561	0.286142	0.503419	0.568396	0.569766	0.669866	Rnf208	-2.35003	6.21681	1.21937	0.196142
ENSMUSG00000054204	3.06384	-3.40128	2.05276	-1.65693	0.0975336	NA	Alkal2	-6.03432	6.20333	0.0946481	0.0152576
ENSMUSG00000029657	145.043	-0.117555	0.402417	-0.292124	0.770192	0.835116	Hsph1	-2.7501	6.20117	0.921748	0.148641
ENSMUSG00000055491	23.1472	3.44526	0.794977	4.33378	1.4657e-05	7.80839e-05	Pprc1	0.819278	6.17303	10.8925	1.76452
ENSMUSG00000028108	12.9681	1.23193	0.777771	1.58392	0.113212	0.191319	Ecm1	-1.39401	6.17285	2.34881	0.380506
ENSMUSG00000021367	4.93294	0.353717	1.30672	0.270691	0.786628	0.846957	Edn1	-2.26963	6.16179	1.27785	0.207383
ENSMUSG00000059674	6.42821	-0.59275	1.11043	-0.533801	0.593479	0.690685	Cdh24	-3.21576	6.16035	0.663078	0.107636
ENSMUSG00000032892	38.6914	1.07502	0.615434	1.74677	0.0806779	0.144538	Rangrf	-1.54588	6.15133	2.10675	0.342487
ENSMUSG00000064354	1986.52	-5.64802	0.496127	-11.3842	5.01158e-30	2.15351e-28	COX2	-8.2681	6.14782	0.0199423	0.00324381
ENSMUSG00000055629	4.16411	-0.0860951	3.4843	-0.0247094	0.980287	0.987102	B4galnt4	-2.70561	6.14545	0.942069	0.153296
ENSMUSG00000026315	5.08142	0.172759	1.27774	0.135207	0.892448	0.92575	Serpinb8	-2.44613	6.14278	1.12721	0.183502
ENSMUSG00000008450	79.3322	1.11759	0.381712	2.92785	0.00341317	0.0102195	Nutf2	-1.50126	6.14262	2.16985	0.353245
ENSMUSG00000029452	2.98037	-0.574222	1.60056	-0.358763	0.719773	NA	Tmem116	-3.19264	6.14075	0.671649	0.109376
ENSMUSG00000014668	5.94776	4.07824	1.93613	2.10639	0.0351704	0.0734921	Chfr	1.46027	6.13886	16.8917	2.7516
ENSMUSG00000022842	37.0293	1.43696	0.531438	2.7039	0.00685302	0.0186323	Ece2	-1.17214	6.10123	2.70749	0.443761
ENSMUSG00000022339	16.0883	0.136672	0.729008	0.187476	0.851287	0.895164	Ebag9	-2.46625	6.07516	1.09937	0.180961
ENSMUSG00000018378	11.1091	-0.580092	0.90694	-0.639615	0.522423	0.629205	2210416O15Rik	-3.18086	6.0661	0.668921	0.110272
ENSMUSG00000045733	60.431	0.117106	0.425025	0.275528	0.782911	0.844225	Sprn	-2.47346	6.02335	1.08456	0.180059
ENSMUSG00000035713	24.4763	3.07794	0.680769	4.52127	6.14683e-06	3.52437e-05	Usp35	0.490035	6.01226	8.44409	1.40448
ENSMUSG00000031734	15.7648	-1.6784	0.787795	-2.13051	0.0331299	0.0698934	Irx3	-4.248	5.93645	0.312428	0.0526289
ENSMUSG00000015843	35.6632	-0.140945	0.549945	-0.25629	0.797727	0.854957	Rxrg	-2.70184	5.90072	0.906925	0.153697
ENSMUSG00000030055	26.7844	4.21154	0.97256	4.33036	1.48866e-05	7.91996e-05	Rab43	1.65185	5.89579	18.5267	3.14236
ENSMUSG00000023905	34.2215	0.0234693	0.535355	0.0438388	0.965033	0.976268	Tnfrsf12a	-2.53463	5.88931	1.0164	0.172584
ENSMUSG00000040936	8.0417	2.37761	1.32928	1.78864	0.0736724	0.134514	Ulk4	-0.176539	5.87321	5.19676	0.884823
ENSMUSG00000039824	50.0102	-0.0524618	0.516714	-0.10153	0.91913	0.945237	Myl6b	-2.60626	5.87179	0.964289	0.164224
ENSMUSG00000053819	23.9952	2.63177	0.729505	3.60761	0.000309031	0.00122351	Camk2d	0.0800486	5.86333	6.19785	1.05705
ENSMUSG00000040594	2.72468	-1.55367	1.83109	-0.848495	0.396163	NA	Ranbp17	-4.1049	5.86131	0.340641	0.058117
ENSMUSG00000032212	10.3737	1.16634	3.84168	0.303601	0.761432	0.829066	Sltm	-1.38222	5.85048	2.24441	0.383628
ENSMUSG00000030798	217.959	10.2942	1.85312	5.55505	2.77529e-08	2.39565e-07	Cd37	7.75646	5.8067	1255.62	216.236
ENSMUSG00000025893	9.92692	-0.669205	0.929998	-0.719577	0.471786	0.583379	Kbtbd3	-3.20535	5.80039	0.628853	0.108416
ENSMUSG00000028610	13.5941	2.7736	0.899553	3.08331	0.00204709	0.00653099	Dmrtb1	0.240065	5.7899	6.83814	1.18105
ENSMUSG00000042628	17.6866	3.05264	1.04986	2.90765	0.00364152	0.0108076	Zfyve1	0.524562	5.76803	8.2973	1.4385
ENSMUSG00000023259	6.66843	0.563009	1.11977	0.50279	0.615112	0.709337	Slc26a6	-1.95883	5.74314	1.47735	0.257237
ENSMUSG00000004187	374.431	0.534651	2.32305	0.230151	0.817975	0.869487	Kifc2	-1.9865	5.74041	1.44859	0.25235
ENSMUSG00000044986	4.98067	0.753706	1.21269	0.621514	0.534261	0.639072	Tst	-1.76667	5.73731	1.68612	0.293887
ENSMUSG00000020090	5.08114	-0.6175	1.26031	-0.489958	0.624164	0.716795	Npffr1	-3.13171	5.71285	0.651799	0.114094
ENSMUSG00000042662	26.4076	-0.0293783	0.616036	-0.0476892	0.961964	0.97476	Dusp15	-2.54022	5.69954	0.979842	0.171916
ENSMUSG00000002274	242.925	0.489923	0.407426	1.20248	0.229176	0.333927	Metrn	-2.02057	5.69813	1.40437	0.246461
ENSMUSG00000036169	3.37105	-3.14767	1.90033	-1.65638	0.0976441	NA	Sostdc1	-5.65786	5.69695	0.112838	0.0198068
ENSMUSG00000070858	274.869	-0.174434	0.283369	-0.61557	0.538178	0.642124	Gm1673	-2.68415	5.69507	0.886115	0.155593
ENSMUSG00000005374	40.8368	2.25156	0.682882	3.29714	0.000976745	0.00342138	Tbl2	-0.255291	5.68377	4.76197	0.837818
ENSMUSG00000097187	3.61323	-1.06542	1.62313	-0.656398	0.511568	NA	NA	-3.57209	5.68306	0.477834	0.0840803
ENSMUSG00000027301	64.331	-0.928183	0.41874	-2.21661	0.0266497	0.0585554	Oxt	-3.42561	5.64676	0.52552	0.0930657
ENSMUSG00000028744	47.2642	2.4154	0.525057	4.60027	4.21943e-06	2.49361e-05	Pqlc2	-0.0816778	5.64542	5.33468	0.944958
ENSMUSG00000036893	28.9682	2.14106	0.563176	3.80176	0.000143669	0.000613761	Ehmt1	-0.352871	5.63312	4.41087	0.783024
ENSMUSG00000092192	3.22307	-1.90892	1.76112	-1.08392	0.278401	NA	Dnaaf4	-4.3996	5.62045	0.266292	0.0473792
ENSMUSG00000032479	634.337	1.73037	0.204326	8.46869	2.48175e-17	5.3419e-16	Map4	-0.747046	5.569	3.31813	0.595822
ENSMUSG00000073421	285.17	3.99959	0.424671	9.4181	4.59336e-21	1.23873e-19	H2-Ab1	1.52816	5.54594	15.9955	2.88418
ENSMUSG00000036529	268.406	1.65131	0.390503	4.22868	2.35065e-05	0.00011953	Sbf1	-0.819932	5.54523	3.1412	0.566469
ENSMUSG00000003355	4.28909	-0.75999	1.76346	-0.430965	0.666494	0.754112	Fkbp11	-3.23095	5.54414	0.590501	0.106509
ENSMUSG00000052533	31.9981	2.15614	0.600026	3.59341	0.000326384	0.00128183	Nup188	-0.312926	5.53684	4.4572	0.805008
ENSMUSG00000040003	21.0498	0.726453	1.26947	0.57225	0.567152	0.66773	Magi2	-1.73333	5.50134	1.65457	0.300757
ENSMUSG00000033739	48.069	1.84132	0.472269	3.89887	9.66412e-05	0.000428457	Fkbpl	-0.618382	5.50102	3.58337	0.651401
ENSMUSG00000023764	11.4074	2.38993	0.883841	2.70403	0.00685038	0.0186323	Sfi1	-0.0672436	5.49141	5.24133	0.95446
ENSMUSG00000029499	11.0756	-0.978956	0.980317	-0.998611	0.317983	0.430447	Pxmp2	-3.43506	5.48734	0.507347	0.0924576
ENSMUSG00000002871	11.3871	2.68298	1.48122	1.81133	0.0700896	0.12926	Tpra1	0.226963	5.48699	6.4218	1.17037
ENSMUSG00000035298	7.32906	2.143	1.18663	1.80595	0.0709266	0.130516	Klhl35	-0.312096	5.48348	4.41679	0.805471
ENSMUSG00000022561	166.37	1.92155	0.399744	4.80695	1.53249e-06	9.80242e-06	Gpaa1	-0.532647	5.48008	3.7883	0.691285
ENSMUSG00000032178	4.78014	2.38869	1.62195	1.47273	0.140824	0.228494	Ilf3	-0.0607766	5.46213	5.23681	0.958748
ENSMUSG00000023118	208.599	2.09835	0.370651	5.66125	1.50271e-08	1.34157e-07	Sympk	-0.344089	5.4356	4.28219	0.787806
ENSMUSG00000068522	10.1438	-2.78857	1.04535	-2.66759	0.00763971	0.0204504	Aard	-5.22857	5.42642	0.144729	0.0266712
ENSMUSG00000021668	7.45853	0.194116	0.980349	0.198007	0.84304	0.889298	Polk	-2.24505	5.42326	1.14402	0.210947
ENSMUSG00000058966	58.7067	-0.203167	0.682856	-0.297526	0.766065	0.832026	Fam57b	-2.64174	5.42105	0.868641	0.160235
ENSMUSG00000020178	20.9142	-0.0936658	0.759378	-0.123345	0.901834	0.932517	Adora2a	-2.52912	5.40933	0.937139	0.173245
ENSMUSG00000022568	72.2545	1.14421	0.375049	3.05083	0.00228208	0.00719652	Scrib	-1.289	5.40093	2.21025	0.409236
ENSMUSG00000045968	4.7947	-0.399444	1.33184	-0.29992	0.764238	0.830617	Teddm2	-2.82809	5.38389	0.75815	0.140818
ENSMUSG00000018459	73.7361	2.32499	0.417342	5.57095	2.53353e-08	2.19829e-07	Slc13a3	-0.101336	5.37524	5.01063	0.932169
ENSMUSG00000056458	14.4628	-0.427896	0.854054	-0.501017	0.616359	0.710586	Mok	-2.85398	5.37431	0.743345	0.138314
ENSMUSG00000044433	7.08401	-1.17098	1.08639	-1.07787	0.281093	0.39102	Camsap3	-3.59699	5.37406	0.44412	0.0826414
ENSMUSG00000025226	84.194	0.99967	0.446423	2.23929	0.0251371	0.0558384	Fbxl15	-1.42588	5.37234	1.99954	0.372192
ENSMUSG00000025876	68.2414	0.353945	0.620247	0.570653	0.568235	0.668603	Unc5a	-2.06833	5.36018	1.27805	0.238435
ENSMUSG00000001518	30.421	0.254166	0.707271	0.359362	0.719325	0.795701	Itfg2	-2.16618	5.35301	1.19265	0.222799
ENSMUSG00000004951	40.5894	-0.301865	0.721618	-0.418317	0.675715	0.761608	Hspb1	-2.72082	5.34785	0.811203	0.151688
ENSMUSG00000064179	37.7916	0.336473	0.494759	0.680075	0.496457	0.605966	Tnnt1	-2.08163	5.34469	1.26267	0.236247
ENSMUSG00000040877	11.3703	0.0868729	0.95168	0.0912837	0.927267	0.950771	Wdr25	-2.33034	5.34138	1.06207	0.198837
ENSMUSG00000020096	9.85039	-0.426842	1.01245	-0.421592	0.673323	0.759714	Tbata	-2.84284	5.33689	0.743888	0.139386
ENSMUSG00000089665	8.50119	-0.337808	0.952577	-0.354626	0.72287	0.798568	Fcor	-2.75233	5.33144	0.791242	0.148411
ENSMUSG00000050105	12.512	0.61423	0.804352	0.763634	0.445085	0.55801	Grrp1	-1.79291	5.30423	1.53074	0.288589
ENSMUSG00000061878	9.15441	-0.682989	0.984021	-0.69408	0.487632	0.597932	Sphk1	-3.08922	5.30088	0.622874	0.117504
ENSMUSG00000059981	30.3108	2.05142	0.569991	3.59904	0.000319391	0.00125688	Taok2	-0.348804	5.27885	4.14514	0.785235
ENSMUSG00000019761	21.8614	-0.521563	0.671268	-0.776982	0.43717	0.550025	Krt10	-2.9213	5.27707	0.696617	0.132008
ENSMUSG00000042520	41.7573	1.67895	0.642731	2.61221	0.00899587	0.023493	Ubap2l	-0.714295	5.25337	3.20195	0.609503
ENSMUSG00000054716	269.369	0.467448	0.298691	1.56499	0.117585	0.197309	Zfp771	-1.92531	5.2516	1.38266	0.263284
ENSMUSG00000025077	8.64633	1.12581	1.03093	1.09203	0.274819	0.385014	Dclre1a	-1.26408	5.24117	2.18224	0.416365
ENSMUSG00000022952	256.872	8.64355	1.79276	4.82137	1.42574e-06	9.16961e-06	Runx1	6.25381	5.24062	399.914	76.3105
ENSMUSG00000025743	306.621	1.58483	0.274342	5.77685	7.6112e-09	7.01942e-08	Sdc3	-0.798963	5.21908	2.99973	0.574762
ENSMUSG00000001240	237.719	0.539308	0.27128	1.98801	0.0468101	0.0930411	Ramp2	-1.83862	5.19788	1.45328	0.27959
ENSMUSG00000031537	93.0963	3.92951	0.42257	9.29908	1.41667e-20	3.6931e-19	Ikbkb	1.56413	5.15291	15.2371	2.95699
ENSMUSG00000021294	2.62612	-0.712256	1.84008	-0.387079	0.698698	NA	Kif26a	-3.07725	5.15151	0.610365	0.118483
ENSMUSG00000040350	8.9486	-0.204212	1.07224	-0.190455	0.848953	0.89351	Trim7	-2.56913	5.15123	0.868012	0.168506
ENSMUSG00000030816	11.8012	0.978415	0.845926	1.15662	0.247427	0.354838	Rnf40	-1.38489	5.14548	1.9703	0.382919
ENSMUSG00000067825	18.3765	0.766982	0.704432	1.08879	0.276245	0.386295	Pex26	-1.59087	5.12606	1.70171	0.331971
ENSMUSG00000016349	570.568	0.514437	0.386852	1.3298	0.183583	0.281666	Eef1a2	-1.83974	5.11302	1.42844	0.279372
ENSMUSG00000002308	11.5828	2.87707	1.2544	2.29359	0.0218141	0.0495262	Cd320	0.527896	5.09533	7.34657	1.44182
ENSMUSG00000030432	2435.46	2.26178	0.292193	7.74069	9.88804e-15	1.72357e-13	Rpl28	-0.0788841	5.06535	4.79582	0.94679
ENSMUSG00000003208	32.6698	1.90467	0.558565	3.40994	0.000649781	0.00237628	Yju2	-0.43221	5.05209	3.74424	0.741126
ENSMUSG00000032583	47.2804	2.08542	0.485395	4.29635	1.73636e-05	9.0934e-05	Mon1a	-0.251425	5.05198	4.244	0.840066
ENSMUSG00000055707	25.5509	-0.130307	0.932894	-0.13968	0.888913	0.923389	Klhl26	-2.46641	5.04937	0.913637	0.180941
ENSMUSG00000091971	72.9092	0.262559	0.525159	0.49996	0.617103	0.711123	Hspa1a	-2.06925	5.03436	1.1996	0.238283
ENSMUSG00000025577	4.54233	2.04311	1.29507	1.57761	0.114655	0.193305	Cbx2	-0.287727	5.03098	4.12134	0.819192
ENSMUSG00000060166	118.242	1.01351	0.402943	2.51527	0.0118942	0.029738	Zdhhc8	-1.31445	5.02096	2.01882	0.402078
ENSMUSG00000022382	26.9187	-0.551333	0.724064	-0.761443	0.446393	0.559111	Wnt7b	-2.87835	5.01766	0.682389	0.135998
ENSMUSG00000092329	46.1432	0.677912	0.543294	1.24778	0.212111	0.315211	NA	-1.64553	5.00524	1.59982	0.31963
ENSMUSG00000014444	27.3032	4.74075	0.941689	5.03431	4.7957e-07	3.3911e-06	Piezo1	2.42106	4.99227	26.7368	5.35564
ENSMUSG00000019082	239.583	0.0914925	0.343821	0.266105	0.790158	0.849463	Slc25a22	-2.22488	4.98077	1.06547	0.213917
ENSMUSG00000040631	26.4274	-0.202977	0.62184	-0.326414	0.744111	0.815512	Dok4	-2.51456	4.96426	0.868756	0.175002
ENSMUSG00000025511	436.238	3.78502	0.248784	15.2141	2.85286e-52	2.74319e-50	Tspan4	1.47366	4.96351	13.7849	2.77725
ENSMUSG00000055692	17.2348	-0.0187615	3.95268	-0.00474652	0.996213	0.997914	Tmem191c	-2.32682	4.95216	0.98708	0.199323
ENSMUSG00000069920	9.1159	-0.828974	0.974472	-0.85069	0.394942	0.508457	B3gnt9	-3.13181	4.93426	0.56293	0.114086
ENSMUSG00000051243	15.4003	0.474315	0.776146	0.611116	0.541123	0.644917	Islr2	-1.8283	4.93349	1.38926	0.281597
ENSMUSG00000040711	13.1296	0.918852	0.969464	0.947793	0.343235	0.456259	Sh3pxd2b	-1.3808	4.92339	1.89061	0.384006
ENSMUSG00000043811	125.302	0.337373	0.544331	0.619794	0.535394	0.639713	Rtn4r	-1.96218	4.92304	1.26345	0.256641
ENSMUSG00000048772	11.6168	-0.0172811	0.837668	-0.02063	0.983541	0.989475	Tmem53	-2.31064	4.90197	0.988093	0.201571
ENSMUSG00000027222	50.4283	1.51929	0.497944	3.05113	0.00227978	0.00719122	Pex16	-0.774009	4.90177	2.86651	0.58479
ENSMUSG00000036598	3.96517	-1.05579	1.69582	-0.622587	0.533556	0.638623	Ccdc113	-3.34715	4.89515	0.481033	0.0982671
ENSMUSG00000022773	5.04829	-3.65606	1.69714	-2.15425	0.0312209	0.0665914	Ypel1	-5.94724	4.89455	0.079326	0.016207
ENSMUSG00000091956	3.60661	-0.479351	1.43439	-0.334184	0.738241	NA	C2cd4b	-2.76463	4.87457	0.7173	0.147152
ENSMUSG00000015134	5.67732	-3.02832	1.4747	-2.05351	0.0400229	0.081853	Aldh1a3	-5.31074	4.86493	0.12257	0.0251946
ENSMUSG00000038570	4.03052	-2.52581	1.60453	-1.57418	0.115447	0.1945	Saxo2	-4.80329	4.8483	0.173642	0.0358151
ENSMUSG00000004661	32.5053	3.85849	0.733293	5.26187	1.42597e-07	1.1071e-06	Arid3b	1.58137	4.84712	14.5052	2.99253
ENSMUSG00000041120	171.61	0.00988538	0.345199	0.0286368	0.977154	0.985301	Nbl1	-2.26618	4.84355	1.00688	0.20788
ENSMUSG00000007656	284.625	1.42603	0.257714	5.53339	3.14096e-08	2.68757e-07	Arpp19	-0.844883	4.82629	2.68707	0.556756
ENSMUSG00000025377	37.0207	1.53804	0.663462	2.3182	0.0204383	0.0470304	Tepsin	-0.72236	4.79124	2.904	0.606105
ENSMUSG00000030610	22.5945	2.37355	0.72548	3.2717	0.00106903	0.00369171	Det1	0.117061	4.77829	5.18216	1.08452
ENSMUSG00000079598	137.076	0.122509	0.492168	0.248917	0.803425	0.85869	Clec2l	-2.13343	4.77643	1.08863	0.227916
ENSMUSG00000016995	9.39774	0.578538	0.923872	0.62621	0.531177	0.636996	Matn4	-1.67355	4.76373	1.49334	0.31348
ENSMUSG00000100228	5.12611	3.18312	1.437	2.21511	0.0267526	0.0587285	NA	0.932716	4.75817	9.08271	1.90887
ENSMUSG00000032558	7.59599	-0.114286	1.0504	-0.108802	0.91336	0.940962	Nphp3	-2.36424	4.75668	0.92384	0.194219
ENSMUSG00000044927	122.882	0.336794	0.465811	0.723026	0.469664	0.581675	H1fx	-1.91302	4.7562	1.26295	0.265537
ENSMUSG00000040482	29.5902	2.09711	0.638019	3.2869	0.00101297	0.00353033	Dxo	-0.152318	4.75493	4.2785	0.899803
ENSMUSG00000016346	131.75	-0.46153	0.405874	-1.13713	0.255486	0.363735	Kcnq2	-2.70857	4.74709	0.726216	0.152981
ENSMUSG00000042286	498.092	7.15229	0.442922	16.148	1.17344e-58	1.40465e-56	Stab1	4.90622	4.74387	142.25	29.9861
ENSMUSG00000058420	31.3093	-2.07037	0.860902	-2.40489	0.0161774	0.0386983	Syt17	-4.31526	4.74001	0.238098	0.0502315
ENSMUSG00000034675	94.7379	0.488444	0.617905	0.790484	0.429245	0.542262	Dbn1	-1.75539	4.73653	1.40293	0.296194
ENSMUSG00000070780	44.0912	6.63867	0.799871	8.29967	1.04403e-16	2.15626e-15	Rbm47	4.40415	4.70604	99.6409	21.173
ENSMUSG00000059895	193.879	2.7909	0.300551	9.28595	1.60274e-20	4.15049e-19	Ptp4a3	0.562198	4.68711	6.9206	1.47652
ENSMUSG00000063882	1262.1	1.63396	0.26015	6.28087	3.36692e-10	3.69134e-09	Uqcrh	-0.594548	4.6865	3.10365	0.662252
ENSMUSG00000058443	822.098	3.37011	2.3247	1.4497	0.147143	0.236495	NA	1.14181	4.68584	10.3396	2.20657
ENSMUSG00000039994	5.78122	1.29444	1.397	0.926583	0.354143	0.467212	Timeless	-0.933816	4.68566	2.45281	0.523472
ENSMUSG00000070509	70.354	-0.850907	0.390427	-2.17943	0.0292998	0.0632646	Rgma	-3.07501	4.6722	0.554436	0.118667
ENSMUSG00000053004	9.07412	-1.01752	1.13374	-0.89749	0.369458	0.483067	Hrh1	-3.24154	4.67194	0.493964	0.10573
ENSMUSG00000024773	26.8022	1.43219	0.658505	2.17491	0.0296372	0.0638168	Atg2a	-0.790418	4.66735	2.69855	0.578177
ENSMUSG00000010110	75.2387	1.36241	0.369714	3.68505	0.000228658	0.00093333	Stx5a	-0.856828	4.65649	2.57115	0.552165
ENSMUSG00000026879	110.435	0.428681	0.634599	0.675515	0.499349	0.608824	Gsn	-1.7897	4.6537	1.346	0.289233
ENSMUSG00000028958	103.279	-0.125306	0.385923	-0.324693	0.745414	0.816551	Tmub1	-2.34066	4.64394	0.916809	0.197421
ENSMUSG00000041696	4.78845	0.0674952	1.23835	0.0545039	0.956534	0.971187	Rasl12	-2.1455	4.63636	1.0479	0.226017
ENSMUSG00000032593	4.87797	3.35526	1.56916	2.13826	0.0324958	0.0687481	Amigo3	1.14381	4.63142	10.2338	2.20964
ENSMUSG00000014198	11.2568	0.818999	0.868666	0.942824	0.345771	0.458695	Zfp385c	-1.39238	4.63116	1.76418	0.380937
ENSMUSG00000019158	281.324	2.02836	0.330023	6.14611	7.94075e-10	8.22906e-09	Tmem160	-0.182082	4.62816	4.0794	0.88143
ENSMUSG00000093445	265.057	5.21189	0.433831	12.0136	3.01317e-33	1.48519e-31	Lrch4	3.00218	4.6258	37.0624	8.01212
ENSMUSG00000100725	18.3363	3.05499	1.08925	2.80467	0.00503675	0.0143031	NA	0.845373	4.62551	8.3108	1.79673
ENSMUSG00000041309	64.1623	-0.303266	0.42116	-0.720073	0.47148	0.583089	Nkx6-2	-2.51251	4.62432	0.810416	0.175251
ENSMUSG00000040557	18.3369	0.262115	0.703814	0.37242	0.70958	0.787818	Mettl27	-1.94613	4.62113	1.19924	0.259511
ENSMUSG00000020902	3.16117	-0.0718555	1.50916	-0.0476129	0.962025	NA	Ntn1	-2.27969	4.61983	0.951414	0.205941
ENSMUSG00000096370	33.0106	0.572836	0.523075	1.09513	0.273459	0.383589	Gm21992	-1.63241	4.61152	1.48744	0.32255
ENSMUSG00000005621	65.893	2.35231	0.402805	5.83982	5.22566e-09	4.90026e-08	Zfp592	0.149051	4.60518	5.1064	1.10884
ENSMUSG00000057342	75.5125	2.26009	0.423284	5.33942	9.32452e-08	7.44122e-07	Sphk2	0.0569785	4.60471	4.79021	1.04028
ENSMUSG00000030666	3.69252	-2.44967	1.6831	-1.45545	0.145544	0.234562	Calcb	-4.64861	4.5914	0.183052	0.0398685
ENSMUSG00000038677	3.79637	-0.70509	2.14039	-0.329421	0.741838	0.813546	Scube3	-2.90361	4.59009	0.613404	0.133637
ENSMUSG00000015605	27.2432	2.09668	0.587716	3.5675	0.000360406	0.0014023	Srf	-0.100528	4.5859	4.27723	0.932692
ENSMUSG00000039781	15.954	2.88317	0.883624	3.26289	0.00110282	0.00379279	Cep131	0.687896	4.57976	7.37769	1.61093
ENSMUSG00000042451	5.33489	3.68215	1.51581	2.42916	0.0151338	0.0365476	Mybph	1.48955	4.57127	12.8362	2.80802
ENSMUSG00000059900	6.49694	0.119613	1.06928	0.111863	0.910932	0.939276	Tmem40	-2.07272	4.57043	1.08644	0.237711
ENSMUSG00000021108	19.0452	3.63949	0.815037	4.46543	7.99075e-06	4.46591e-05	Prkch	1.45028	4.56057	12.4622	2.7326
ENSMUSG00000025810	41.6462	4.5733	0.6127	7.46418	8.38208e-14	1.33601e-12	Nrp1	2.38577	4.55524	23.8067	5.22623
ENSMUSG00000017754	36.6708	0.76123	0.518921	1.46695	0.14239	0.230493	Pltp	-1.42307	4.54507	1.69494	0.372918
ENSMUSG00000046159	16.1371	-1.13154	0.739684	-1.52976	0.126077	0.208988	Chrm3	-3.31535	4.54354	0.45643	0.100457
ENSMUSG00000045045	44.869	0.821097	0.464006	1.76958	0.0767968	0.139028	Lrfn4	-1.35929	4.53274	1.76675	0.389775
ENSMUSG00000034205	10.7643	-0.772872	0.87119	-0.887145	0.375001	0.488793	Loxl2	-2.95108	4.5259	0.585251	0.129312
ENSMUSG00000035640	649.906	-0.330049	0.239303	-1.37921	0.167829	0.262088	Cbarp	-2.50684	4.52146	0.795509	0.175941
ENSMUSG00000033233	21.8687	0.854033	0.631117	1.35321	0.175989	0.271874	Trim45	-1.32158	4.51779	1.80755	0.400096
ENSMUSG00000033152	184.98	0.267777	0.408924	0.654832	0.512576	0.620924	Podxl2	-1.90381	4.50519	1.20395	0.267236
ENSMUSG00000033768	391.892	-0.00474874	0.331845	-0.0143101	0.988583	0.992389	Nrxn2	-2.17513	4.50142	0.996714	0.221422
ENSMUSG00000019338	129.727	2.77177	0.339629	8.16116	3.31816e-16	6.55308e-15	Zfp687	0.604244	4.49251	6.82944	1.52018
ENSMUSG00000032041	56.3666	3.66128	0.557466	6.56772	5.10909e-11	6.198e-10	Tirap	1.496	4.48555	12.6519	2.82059
ENSMUSG00000024352	16.9411	0.817217	0.70004	1.16739	0.243054	0.349849	Spata24	-1.34322	4.4705	1.762	0.394141
ENSMUSG00000035407	4.50493	-0.373386	1.53146	-0.24381	0.807378	0.861815	Kank4	-2.53377	4.47035	0.771968	0.172687
ENSMUSG00000037553	79.7995	1.09535	0.382955	2.86024	0.00423318	0.0122707	Zdhhc18	-1.06444	4.46849	2.13664	0.478158
ENSMUSG00000059316	166.106	1.35093	0.329825	4.09591	4.20515e-05	0.000201844	Slc27a4	-0.808305	4.46679	2.55077	0.571052
ENSMUSG00000040258	7.4731	-0.334636	1.09438	-0.305776	0.759775	0.828031	Nxph4	-2.49113	4.4583	0.792984	0.177867
ENSMUSG00000038545	53.055	1.82229	0.506891	3.59504	0.000324337	0.00127421	Cul7	-0.330193	4.44593	3.53643	0.79543
ENSMUSG00000002985	15856.3	2.02577	0.176353	11.487	1.53309e-30	6.68576e-29	Apoe	-0.126259	4.44454	4.0721	0.916204
ENSMUSG00000055523	4.45398	-0.46131	1.6124	-0.286102	0.7748	0.838331	Gucy2g	-2.61164	4.4393	0.726326	0.163613
ENSMUSG00000019235	20.1386	-6.95633	1.43051	-4.86283	1.15719e-06	7.61358e-06	Rps6kl1	-9.10643	4.43856	0.00805258	0.00181423
ENSMUSG00000002058	61.2872	-0.547713	0.43434	-1.26103	0.207299	0.309787	Unc119	-2.69775	4.43838	0.684104	0.154134
ENSMUSG00000014301	214.098	-0.22308	0.369827	-0.603203	0.546374	0.649986	Pam16	-2.37157	4.43364	0.856734	0.193235
ENSMUSG00000015290	91.8366	2.36502	0.480901	4.9179	8.74791e-07	5.89103e-06	Ubl4a	0.216605	4.43341	5.1516	1.162
ENSMUSG00000033885	49.9104	1.14796	2.22485	0.515971	0.605875	0.7017	Pxk	-0.996852	4.42234	2.216	0.501092
ENSMUSG00000037344	112.617	3.92944	0.523453	7.50677	6.0606e-14	9.77949e-13	Slc12a9	1.78497	4.42128	15.2362	3.44612
ENSMUSG00000037426	25.4012	1.42549	0.697249	2.04445	0.0409093	0.0833028	Depdc5	-0.717793	4.41766	2.68606	0.608027
ENSMUSG00000030401	122.554	-0.161745	0.463997	-0.348591	0.727397	0.802855	Rtn2	-2.30344	4.41279	0.893943	0.20258
ENSMUSG00000055809	7.67596	4.3551	1.36941	3.18028	0.00147134	0.00487165	Dnaaf3	2.2146	4.40913	20.4652	4.64154
ENSMUSG00000071324	9.40299	-1.8184	1.03177	-1.76241	0.0780002	0.140729	Armc2	-3.95886	4.40902	0.283535	0.0643079
ENSMUSG00000027318	3.50488	1.16837	1.44285	0.809766	0.418075	NA	Adam33	-0.971677	4.40778	2.24758	0.509913
ENSMUSG00000059119	42.6827	0.453528	0.538629	0.842005	0.399785	0.51306	Nap1l4	-1.68492	4.40289	1.36939	0.31102
ENSMUSG00000054863	299.632	-1.69902	0.27402	-6.20037	5.63296e-10	5.96392e-09	Tafa5	-3.83375	4.39153	0.307994	0.0701338
ENSMUSG00000018040	198.537	2.04806	0.479664	4.26977	1.95677e-05	0.000101301	Rrp7a	-0.0853302	4.38746	4.13548	0.942569
ENSMUSG00000026269	174.275	3.56751	0.379755	9.39422	5.76447e-21	1.54039e-19	Rnpepl1	1.43501	4.38474	11.8557	2.70385
ENSMUSG00000019320	5.65402	2.23272	1.17164	1.90564	0.0566971	0.10916	Noxo1	0.101492	4.3809	4.70019	1.07288
ENSMUSG00000032515	22.1014	1.05354	0.640379	1.64519	0.0999314	0.172956	Csrnp1	-1.07689	4.37848	2.07562	0.474051
ENSMUSG00000048251	55.9401	0.83398	0.475396	1.75429	0.0793815	0.142826	Bcl11b	-1.29517	4.37459	1.7826	0.407489
ENSMUSG00000017314	19.7948	0.204989	0.728641	0.28133	0.778457	0.841201	Mpp2	-1.91869	4.35805	1.15268	0.264494
ENSMUSG00000003345	373.008	1.45472	0.276464	5.26187	1.42598e-07	1.1071e-06	Csnk1g2	-0.667711	4.35427	2.74103	0.629505
ENSMUSG00000087412	641.14	1.78355	0.215714	8.26815	1.36059e-16	2.78553e-15	NA	-0.336721	4.34777	3.44273	0.791839
ENSMUSG00000002409	17.277	1.56068	0.75126	2.07742	0.0377631	0.077979	Dyrk1b	-0.558629	4.34486	2.94993	0.678947
ENSMUSG00000027603	103.271	-0.49312	0.360247	-1.36884	0.17105	0.266126	Ggt7	-2.61217	4.34407	0.710487	0.163553
ENSMUSG00000019978	234.506	3.99936	0.303595	13.1734	1.2491e-39	7.83593e-38	Epb41l2	1.88137	4.34089	15.9929	3.68425
ENSMUSG00000046822	60.18	0.862923	0.419048	2.05925	0.0394707	0.0809353	Slc39a3	-1.25364	4.3366	1.81872	0.419388
ENSMUSG00000027490	24.7117	0.64844	0.601222	1.07854	0.280794	0.3907	E2f1	-1.46667	4.33224	1.56747	0.361816
ENSMUSG00000031708	31.246	-5.54727	1.30104	-4.26373	2.01045e-05	0.000103897	Tecr	-7.66152	4.32967	0.0213849	0.00493914
ENSMUSG00000063897	27.2357	3.10009	0.717093	4.32314	1.53826e-05	8.16159e-05	Dhrsx	0.986594	4.32739	8.57473	1.9815
ENSMUSG00000036067	25.1395	-0.0183516	0.614231	-0.0298773	0.976165	0.984558	Slc2a6	-2.12947	4.32027	0.98736	0.228541
ENSMUSG00000042613	433.489	3.85148	0.258825	14.8807	4.40137e-50	3.85317e-48	Pbxip1	1.74772	4.29829	14.4348	3.35828
ENSMUSG00000090110	19.9409	-0.522831	0.661469	-0.790409	0.429289	0.542262	Cmc4	-2.62418	4.29109	0.696005	0.162198
ENSMUSG00000020893	102.289	1.24899	0.35528	3.51552	0.000438896	0.00167819	Per1	-0.852103	4.29036	2.37676	0.553977
ENSMUSG00000055817	27.7026	1.36202	0.585409	2.32662	0.0199857	0.0462066	Mta3	-0.736806	4.28361	2.57045	0.600066
ENSMUSG00000022715	3.40074	-2.46746	1.96239	-1.25737	0.208618	NA	Tmem114	-4.56308	4.27408	0.180809	0.0423036
ENSMUSG00000030683	263.514	-0.659688	0.301214	-2.1901	0.0285171	0.0619394	Sez6l2	-2.75511	4.27351	0.633015	0.148125
ENSMUSG00000099034	6.3591	0.507589	1.16142	0.437042	0.662081	0.75064	NA	-1.58539	4.26629	1.42167	0.333234
ENSMUSG00000060336	5.45011	1.02677	1.13818	0.902118	0.366994	0.480559	Zfp937	-1.0639	4.25947	2.03746	0.478336
ENSMUSG00000050592	14.224	3.82783	0.933836	4.09904	4.14864e-05	0.000199458	Fam78a	1.73999	4.25113	14.2001	3.34032
ENSMUSG00000047671	5.69901	2.13973	1.23368	1.73443	0.0828421	0.147805	Tctex1d4	0.0539549	4.24504	4.4068	1.03811
ENSMUSG00000005951	7.37342	2.48859	1.15229	2.1597	0.0307962	0.0659252	Shpk	0.40401	4.24151	5.61229	1.32318
ENSMUSG00000001444	3.40958	0.737814	1.67137	0.441442	0.658893	NA	Tbx21	-1.34581	4.23871	1.66765	0.393433
ENSMUSG00000000983	1.87931	-3.34735	2.75024	-1.21711	0.223561	NA	Wfdc18	-5.42564	4.22307	0.0982535	0.0232659
ENSMUSG00000001138	39.2987	1.90657	0.52709	3.61717	0.000297845	0.00118522	Cnnm3	-0.17013	4.21842	3.74918	0.888762
ENSMUSG00000025855	768.47	-0.114842	0.421796	-0.272269	0.785415	0.846358	Prkar1b	-2.18806	4.20824	0.923483	0.219446
ENSMUSG00000096727	142.525	6.98551	0.547016	12.7702	2.40536e-37	1.3832e-35	Psmb9	4.91303	4.20609	126.72	30.1279
ENSMUSG00000084845	76.4905	0.166265	0.448265	0.370909	0.710706	0.788577	Tmem240	-1.90596	4.20535	1.12215	0.266838
ENSMUSG00000031979	57.5857	1.15838	0.413213	2.80335	0.00505752	0.0143447	Cog2	-0.912051	4.20012	2.23206	0.531429
ENSMUSG00000057594	53.3877	0.878965	0.664221	1.3233	0.185735	0.284085	Arl16	-1.19085	4.19834	1.83905	0.438044
ENSMUSG00000024048	210.099	2.54268	0.292052	8.70625	3.14087e-18	7.24443e-17	Myl12a	0.473892	4.19535	5.82671	1.38885
ENSMUSG00000024969	140.488	1.73264	0.341087	5.07976	3.7792e-07	2.73665e-06	Mark2	-0.332532	4.18484	3.32336	0.794141
ENSMUSG00000026062	4.01395	-1.18546	1.40028	-0.846586	0.397226	0.510445	Slc9a2	-3.24726	4.17507	0.439685	0.105312
ENSMUSG00000002504	26.8062	-0.245537	0.755885	-0.324833	0.745307	0.816511	Slc9a3r2	-2.30578	4.17055	0.843502	0.202252
ENSMUSG00000026959	347.947	-0.0809345	0.416336	-0.194397	0.845865	0.891088	Grin1	-2.14067	4.16911	0.945445	0.226774
ENSMUSG00000000301	7.98883	0.174244	0.963835	0.180782	0.856538	0.899074	Pemt	-1.88244	4.16029	1.12837	0.271225
ENSMUSG00000032741	283.134	3.6285	0.390594	9.28971	1.54712e-20	4.01533e-19	Tpcn1	1.572	4.15977	12.3677	2.97317
ENSMUSG00000033287	304.986	0.0721844	0.374387	0.192807	0.84711	0.892051	Kctd17	-1.98429	4.15969	1.05131	0.252737
ENSMUSG00000030789	18.6655	7.45972	1.42849	5.22212	1.7689e-07	1.35716e-06	Itgax	5.40396	4.15763	176.035	42.3403
ENSMUSG00000028480	9.73797	-1.07301	0.921996	-1.16379	0.244511	0.3516	Glipr2	-3.12809	4.15568	0.475327	0.11438
ENSMUSG00000062031	18.4943	2.13944	0.712524	3.00262	0.00267664	0.00829581	Pgghg	0.0881805	4.14468	4.40591	1.06303
ENSMUSG00000050357	63.2163	-0.305627	0.518344	-0.589622	0.555444	0.657708	Carmil2	-2.35608	4.14236	0.80909	0.195321
ENSMUSG00000032661	16.2963	0.872601	0.725695	1.20243	0.229195	0.333927	Oas3	-1.17547	4.13551	1.83096	0.442741
ENSMUSG00000027009	5.69308	0.856731	1.31918	0.649441	0.516053	0.623912	Itga4	-1.18981	4.13116	1.81093	0.438359
ENSMUSG00000060862	14.7618	1.8767	0.862868	2.17496	0.0296334	0.0638168	Zbtb40	-0.169655	4.13061	3.67234	0.889056
ENSMUSG00000037622	167.103	1.18657	0.505655	2.34659	0.0189461	0.0441687	Wdtc1	-0.857477	4.124	2.2761	0.551917
ENSMUSG00000006218	4.3126	-2.32883	1.77452	-1.31237	0.189395	0.28862	Fam131c	-4.37161	4.12039	0.199046	0.0483075
ENSMUSG00000044949	5.84425	0.0835225	1.13816	0.0733837	0.941501	0.960747	Ubtd2	-1.95919	4.12019	1.0596	0.257173
ENSMUSG00000017400	72.0367	-0.306986	0.492184	-0.623721	0.532811	0.638252	Stac2	-2.34844	4.1166	0.808329	0.196358
ENSMUSG00000034891	2419.74	-0.0712016	0.254118	-0.280191	0.779331	0.841556	Sncb	-2.11229	4.11555	0.951845	0.23128
ENSMUSG00000045471	39.1963	-0.858018	0.505152	-1.69853	0.0894068	0.157293	Hcrt	-2.89842	4.11361	0.55171	0.134118
ENSMUSG00000047797	44.1787	-0.890464	0.493845	-1.80313	0.0713685	0.1311	Gjb1	-2.93065	4.11299	0.539441	0.131155
ENSMUSG00000019302	384.792	0.855082	0.365508	2.33944	0.0193129	0.0448189	Atp6v0a1	-1.18344	4.10826	1.80886	0.440299
ENSMUSG00000021281	27.2973	5.14859	0.87174	5.90611	3.50287e-09	3.35464e-08	Tnfaip2	3.11168	4.10364	35.4715	8.64391
ENSMUSG00000003762	14.1091	1.59114	0.78168	2.03554	0.0417968	0.0847143	Coq8b	-0.445597	4.10316	3.01287	0.73428
ENSMUSG00000039623	29.9619	1.12052	0.682611	1.64151	0.100691	0.173955	Ap5z1	-0.915811	4.102	2.17425	0.530046
ENSMUSG00000026073	10.5099	-2.03926	1.5635	-1.30429	0.192135	0.292123	Il1r2	-4.07428	4.09827	0.243288	0.0593637
ENSMUSG00000062785	150.887	-0.0253988	0.33757	-0.07524	0.940024	0.959908	Kcnc3	-2.05737	4.08964	0.982549	0.240253
ENSMUSG00000048120	300.838	7.04158	0.556234	12.6594	9.92768e-37	5.59912e-35	Entpd1	5.01101	4.08565	131.743	32.2453
ENSMUSG00000096753	2.87062	-0.828679	1.85229	-0.447382	0.6546	NA	Fam181a	-2.85776	4.08146	0.563045	0.137952
ENSMUSG00000021253	10.4467	-1.43858	0.942536	-1.52628	0.12694	0.21021	Tgfb3	-3.46607	4.07696	0.368931	0.0904917
ENSMUSG00000055991	12.5763	1.00547	0.817546	1.22987	0.218747	0.322487	Zkscan5	-1.02027	4.072	2.0076	0.493025
ENSMUSG00000026841	12.3586	-0.158576	0.931929	-0.170159	0.864885	0.905566	Fibcd1	-2.18324	4.06896	0.895909	0.220181
ENSMUSG00000040904	281.447	3.24675	3.83391	0.846849	0.397079	0.510313	NA	1.22271	4.06719	9.49223	2.33385
ENSMUSG00000024947	68.4193	0.904045	0.437348	2.06711	0.0387239	0.0796171	Men1	-1.11837	4.06262	1.87131	0.460615
ENSMUSG00000046546	16.7459	-0.0126497	0.717192	-0.0176378	0.985928	0.990657	Fam43a	-2.03491	4.06218	0.99127	0.244024
ENSMUSG00000068220	69.2842	1.61248	0.447728	3.60147	0.000316424	0.00124815	Lgals1	-0.408386	4.05827	3.05777	0.753466
ENSMUSG00000074406	47.6829	2.21965	0.506538	4.38199	1.17599e-05	6.38683e-05	Zfp628	0.200288	4.05403	4.65779	1.14893
ENSMUSG00000025782	44.8647	1.63463	0.7151	2.28588	0.0222611	0.0503848	Taf3	-0.3807	4.04274	3.10509	0.768065
ENSMUSG00000058239	586.249	2.02931	0.266563	7.61286	2.68092e-14	4.51866e-13	Usf2	0.0144264	4.04147	4.08209	1.01005
ENSMUSG00000022421	256.428	0.0457704	0.376532	0.121558	0.903249	0.93357	Nptxr	-1.96777	4.03772	1.03223	0.255648
ENSMUSG00000035863	49.3179	0.130831	0.555291	0.235608	0.813737	0.866383	Palm	-1.88202	4.03578	1.09492	0.271304
ENSMUSG00000034949	24.1825	0.330341	0.656964	0.502829	0.615084	0.709337	Zfr2	-1.68011	4.02909	1.25731	0.312058
ENSMUSG00000044216	145.829	0.0465303	0.381202	0.122062	0.90285	0.933239	Kcnj4	-1.96329	4.02731	1.03278	0.256444
ENSMUSG00000036578	9.21818	-0.470663	2.70049	-0.174288	0.861639	0.903135	Fxyd7	-2.47975	4.02528	0.721633	0.179275
ENSMUSG00000026176	163.235	2.86394	0.466489	6.13936	8.28564e-10	8.57133e-09	Ctdsp1	0.855313	4.024	7.28002	1.80915
ENSMUSG00000005514	209.433	1.222	0.26479	4.61498	3.93127e-06	2.33271e-05	Por	-0.783945	4.01653	2.3327	0.580776
ENSMUSG00000019828	29.7458	-0.22945	0.68504	-0.334944	0.737667	0.810108	Grm1	-2.23427	4.01338	0.85296	0.212529
ENSMUSG00000021608	196.791	2.6769	0.286558	9.34158	9.49108e-21	2.51332e-19	Lpcat1	0.672139	4.01322	6.39481	1.59343
ENSMUSG00000022194	218.173	1.97116	0.382057	5.15933	2.47831e-07	1.86127e-06	Pabpn1	-0.0301005	4.0035	3.92083	0.979352
ENSMUSG00000046605	6.5308	1.89842	1.16893	1.62407	0.104361	0.17909	B3gntl1	-0.100876	3.99805	3.72805	0.932467
ENSMUSG00000045672	65.578	4.98526	0.550577	9.0546	1.37072e-19	3.34301e-18	Col27a1	2.9861	3.99768	31.6747	7.92327
ENSMUSG00000048997	7.1691	1.78238	1.0898	1.63551	0.101941	0.175657	Atxn7l2	-0.216545	3.99703	3.43994	0.860624
ENSMUSG00000032997	136.885	0.0478938	0.542072	0.0883532	0.929596	0.952493	Chpf	-1.95042	3.99532	1.03375	0.258741
ENSMUSG00000037366	8.328	0.000873144	1.0341	0.00084435	0.999326	0.999752	Pafah2	-1.99743	3.99529	1.00061	0.250446
ENSMUSG00000020918	54.3963	1.85491	0.460571	4.02743	5.6391e-05	0.000263555	Kat2a	-0.14226	3.99217	3.6173	0.906098
ENSMUSG00000031937	19.5962	-1.09428	0.731873	-1.49517	0.134869	0.220644	Vstm5	-3.0913	3.99176	0.468371	0.117334
ENSMUSG00000039059	144.483	-0.204782	0.335283	-0.610773	0.54135	0.645121	Hrh3	-2.20061	3.98844	0.86767	0.217546
ENSMUSG00000015476	176.795	-0.16883	0.290732	-0.580708	0.561437	0.662931	Prrt1	-2.16423	3.98727	0.889564	0.223101
ENSMUSG00000024176	3.53529	0.016705	1.69379	0.00986249	0.992131	NA	Sox8	-1.97862	3.98706	1.01165	0.253732
ENSMUSG00000040387	9.23954	0.0996425	1.02487	0.0972247	0.922548	0.94734	Klhl32	-1.89462	3.98412	1.07151	0.268945
ENSMUSG00000003469	423.709	-0.0339174	0.342315	-0.0990826	0.921073	0.946362	Phyhip	-2.02659	3.97975	0.976764	0.245434
ENSMUSG00000011589	5.74931	-0.798531	1.23422	-0.64699	0.517638	0.625011	Fsd1	-2.79088	3.97885	0.574934	0.144498
ENSMUSG00000049971	19.7881	-0.044068	0.675583	-0.0652295	0.947991	0.964768	Glt1d1	-2.03627	3.97842	0.969916	0.243794
ENSMUSG00000020534	6.60331	2.92408	1.12786	2.59259	0.0095255	0.0246566	Shmt1	0.933196	3.97479	7.58987	1.9095
ENSMUSG00000058260	5.13257	-1.66697	1.34293	-1.24129	0.214498	0.317953	Serpina9	-3.656	3.96969	0.314914	0.0793296
ENSMUSG00000054792	22.7299	0.382524	0.642406	0.595456	0.551539	0.654273	Klhl18	-1.60233	3.95823	1.30362	0.329344
ENSMUSG00000022150	22.7993	1.64155	0.624656	2.62793	0.00859063	0.0226414	Dab2	-0.340538	3.95065	3.12001	0.789747
ENSMUSG00000024325	18.7803	1.72997	0.748984	2.30975	0.0209019	0.047844	Ring1	-0.251414	3.94871	3.3172	0.840073
ENSMUSG00000006307	21.1361	1.8412	0.643978	2.85911	0.0042483	0.0123024	Kmt2b	-0.136181	3.93779	3.58309	0.909924
ENSMUSG00000022440	4.22193	-0.180935	1.35585	-0.133448	0.893839	0.926865	C1qtnf6	-2.15827	3.93765	0.882131	0.224025
ENSMUSG00000008036	979.578	1.61368	0.197208	8.18259	2.77816e-16	5.5332e-15	Ap2s1	-0.363454	3.93709	3.0603	0.777301
ENSMUSG00000078201	79.4239	2.57248	0.439912	5.84773	4.98337e-09	4.68429e-08	Tmem203	0.596946	3.93275	5.94832	1.51251
ENSMUSG00000078958	13.4526	-0.840781	0.816829	-1.02932	0.303328	0.415257	Atp6ap1l	-2.8147	3.92834	0.558341	0.142132
ENSMUSG00000008090	24.0011	0.56624	0.599876	0.943928	0.345206	0.45836	Fgfrl1	-1.40699	3.92646	1.48066	0.377098
ENSMUSG00000022558	74.2269	1.6251	0.398653	4.07647	4.57237e-05	0.000217865	Mroh1	-0.345878	3.92034	3.08464	0.786829
ENSMUSG00000024232	10.3417	-1.45002	0.993351	-1.45973	0.144365	0.233015	Bambi	-3.4207	3.91953	0.366016	0.0933828
ENSMUSG00000022044	669.667	-0.0375634	0.267281	-0.140539	0.888234	0.923011	Stmn4	-2.00633	3.91432	0.974299	0.248906
ENSMUSG00000027935	18.8228	0.481954	0.66177	0.72828	0.466442	0.578439	Rab13	-1.48612	3.91245	1.39663	0.356972
ENSMUSG00000030538	149.527	2.87036	0.329836	8.70239	3.24974e-18	7.47503e-17	Cib1	0.902506	3.91187	7.3125	1.86931
ENSMUSG00000020331	155.931	-0.232689	0.443563	-0.52459	0.599868	0.696255	Hcn2	-2.19872	3.90691	0.851047	0.217831
ENSMUSG00000068037	9.36742	-1.11048	1.02939	-1.07877	0.28069	0.390603	Mas1	-3.07432	3.90099	0.463141	0.118724
ENSMUSG00000020806	7.94796	4.62696	1.40102	3.30256	0.000958076	0.00336603	Rhbdf2	2.66342	3.90017	24.7089	6.33534
ENSMUSG00000045886	10.4763	-0.17505	1.08906	-0.160736	0.872302	0.911196	NA	-2.13708	3.8961	0.885737	0.227339
ENSMUSG00000053175	14.6829	2.93262	0.825928	3.5507	0.000384212	0.00148949	Bcl3	0.971761	3.89294	7.63496	1.96123
ENSMUSG00000023072	17.8366	1.76475	0.683686	2.58123	0.00984499	0.0253716	Cep89	-0.19577	3.89202	3.39815	0.873107
ENSMUSG00000032077	19.6053	2.60667	0.730005	3.57075	0.000355959	0.00138637	Bud13	0.647375	3.88871	6.09095	1.56632
ENSMUSG00000021356	5.99161	5.76098	1.7634	3.26697	0.00108706	0.00374517	Irf4	3.8033	3.88435	54.2284	13.9607
ENSMUSG00000037843	532.768	-0.302146	0.2248	-1.34406	0.178927	0.275568	Vstm2l	-2.2588	3.88162	0.811045	0.208945
ENSMUSG00000023011	267.112	-0.728202	0.309196	-2.35515	0.0185154	0.043311	Faim2	-2.68365	3.87835	0.603656	0.155648
ENSMUSG00000045246	27.2328	0.408482	0.726967	0.561899	0.574185	0.673965	Kcng4	-1.54559	3.87468	1.32729	0.342555
ENSMUSG00000030731	57.6542	-0.235136	0.479144	-0.490742	0.623609	0.716439	Syt3	-2.1857	3.86526	0.849605	0.219805
ENSMUSG00000034412	117.066	2.70913	0.331312	8.17695	2.91107e-16	5.7881e-15	Tbc1d10a	0.761924	3.85626	6.53926	1.69575
ENSMUSG00000029594	4.88347	1.1431	1.55381	0.735678	0.461927	0.574458	Rbm19	-0.797055	3.83747	2.20855	0.575523
ENSMUSG00000000125	6.43797	-0.158145	1.0842	-0.145863	0.884029	0.920099	Wnt3	-2.09334	3.82428	0.896177	0.234338
ENSMUSG00000038803	120.963	2.66088	0.496894	5.35502	8.55447e-08	6.89465e-07	Ost4	0.727609	3.8192	6.32419	1.65589
ENSMUSG00000009566	8.23811	2.87483	1.06281	2.70493	0.00683189	0.0185908	Fpgs	0.942177	3.81757	7.33517	1.92143
ENSMUSG00000019889	10.2097	-1.43073	0.911862	-1.56902	0.116644	0.196039	Ptprk	-3.36219	3.81443	0.370944	0.0972475
ENSMUSG00000049562	15.3349	4.20086	0.972927	4.31775	1.57624e-05	8.34427e-05	Ap5b1	2.26982	3.81329	18.3901	4.82264
ENSMUSG00000030323	29.7696	0.151949	0.643936	0.235969	0.813456	0.866333	Ift122	-1.77809	3.81064	1.11107	0.29157
ENSMUSG00000090125	131.103	-0.691847	0.375538	-1.84228	0.0654337	0.122288	Pou3f1	-2.62148	3.80958	0.619061	0.162501
ENSMUSG00000013150	21.4585	0.0165788	0.624452	0.0265494	0.978819	0.986302	Gfod2	-1.9109	3.8039	1.01156	0.265926
ENSMUSG00000048200	45.8028	4.93535	0.607946	8.11807	4.73637e-16	9.21433e-15	Cracr2b	3.008	3.80357	30.5977	8.04447
ENSMUSG00000018537	32.8869	0.187638	0.642298	0.292136	0.770183	0.835116	Pcgf2	-1.73811	3.79935	1.1389	0.299761
ENSMUSG00000027894	107.577	0.00697443	0.323663	0.0215484	0.982808	0.988962	Slc6a17	-1.91814	3.79767	1.00485	0.264596
ENSMUSG00000027489	42.0534	-1.36075	0.643243	-2.11545	0.034392	0.0720323	Necab3	-3.28577	3.79743	0.389381	0.102538
ENSMUSG00000025218	25.1331	2.15114	0.743336	2.8939	0.0038049	0.0112234	Poll	0.226471	3.7965	4.44179	1.16997
ENSMUSG00000025508	6257.54	2.92321	0.243561	12.002	3.46877e-33	1.7026e-31	Rplp2	1.00031	3.79186	7.58533	2.00043
ENSMUSG00000018865	464.664	-0.10316	0.251	-0.410998	0.681074	0.765735	Sult4a1	-2.02492	3.78885	0.930991	0.245719
ENSMUSG00000049551	7.18397	-0.82113	1.09289	-0.751335	0.452451	0.564829	Fzd9	-2.74264	3.78819	0.565999	0.149412
ENSMUSG00000037727	129.01	-0.680969	0.337919	-2.01518	0.0438856	0.0881847	Avp	-2.60186	3.78656	0.623746	0.164726
ENSMUSG00000040649	6.30137	-1.40553	1.28216	-1.09622	0.272982	0.383103	Rimklb	-3.32395	3.7801	0.377479	0.0998596
ENSMUSG00000025486	118.236	-0.684838	0.335932	-2.03862	0.0414878	0.0842459	Sirt3	-2.60303	3.77948	0.622075	0.164593
ENSMUSG00000068240	1146.88	2.13619	0.310698	6.87545	6.17924e-12	8.27496e-11	Uba52	0.219398	3.77583	4.396	1.16425
ENSMUSG00000079444	7.35499	-0.44358	1.05379	-0.42094	0.673799	0.760032	NA	-2.3581	3.76988	0.735307	0.195048
ENSMUSG00000032059	50.6947	2.58216	0.753163	3.42842	0.000607102	0.00223819	Alg9	0.667985	3.76898	5.98836	1.58885
ENSMUSG00000025466	61.0156	0.271243	0.456399	0.59431	0.552305	0.654718	Fuom	-1.64055	3.76276	1.20685	0.320735
ENSMUSG00000062591	142.823	-0.130869	0.478966	-0.273232	0.784675	0.845661	Tubb4a	-2.04241	3.76211	0.913281	0.242757
ENSMUSG00000059824	327.953	0.415637	0.284639	1.46023	0.144228	0.232873	Dbp	-1.4952	3.76027	1.33389	0.354732
ENSMUSG00000020241	7.12338	-0.778773	1.11545	-0.698169	0.485071	0.5961	Col6a2	-2.68829	3.75684	0.582862	0.155147
ENSMUSG00000033102	20.7217	-0.961987	0.918751	-1.04706	0.295072	0.406422	Cdc14b	-2.86846	3.74892	0.513349	0.136933
ENSMUSG00000023232	3.97866	-0.756126	1.48443	-0.509372	0.610492	0.705919	Serinc2	-2.66249	3.74863	0.592084	0.157947
ENSMUSG00000031760	170.47	-0.209775	0.33955	-0.617803	0.536705	0.640758	Mt3	-2.11472	3.74494	0.864672	0.230891
ENSMUSG00000045690	1380.01	1.77667	0.190962	9.30378	1.35535e-20	3.54902e-19	Wdr89	-0.127142	3.74201	3.42634	0.915643
ENSMUSG00000035355	4.67923	-0.462765	1.28193	-0.360991	0.718106	0.794841	Kcnh4	-2.36574	3.73984	0.725594	0.194017
ENSMUSG00000040093	155.211	5.38874	0.412366	13.0678	5.02725e-39	3.10393e-37	Bmf	3.48741	3.73558	41.8959	11.2154
ENSMUSG00000030788	41.9655	1.87384	0.585495	3.20045	0.00137215	0.00458334	Rnf141	-0.0252346	3.72975	3.66508	0.982661
ENSMUSG00000022103	15.419	0.00818376	0.900968	0.0090833	0.992753	0.995588	Gfra2	-1.89088	3.72972	1.00569	0.269642
ENSMUSG00000038422	9.20721	0.463512	1.01671	0.455895	0.648465	0.738629	Hdhd3	-1.43475	3.72765	1.37889	0.36991
ENSMUSG00000033717	10.8196	-0.213049	0.857026	-0.248592	0.803677	0.858839	Adra2a	-2.10868	3.72084	0.862712	0.231859
ENSMUSG00000039452	9.17353	0.385772	0.921902	0.418452	0.675617	0.761608	Snx22	-1.50846	3.71723	1.30656	0.351487
ENSMUSG00000020758	21.6642	-0.465076	0.735136	-0.632639	0.526969	0.633259	Itgb4	-2.35892	3.71623	0.724433	0.194937
ENSMUSG00000041920	179.06	4.03082	0.40392	9.97924	1.87894e-23	5.80048e-22	Slc16a6	2.13759	3.71466	16.3455	4.40025
ENSMUSG00000004945	159.782	1.3807	0.392389	3.51871	0.000433652	0.00165922	Tmem242	-0.51223	3.71389	2.60395	0.701138
ENSMUSG00000025372	242.908	-0.0296468	0.270423	-0.109631	0.912702	0.940546	Baiap2	-1.92258	3.71389	0.97966	0.263783
ENSMUSG00000003420	114.367	3.82092	0.359813	10.6192	2.42603e-26	8.57222e-25	Fcgrt	1.92801	3.71384	14.1323	3.80531
ENSMUSG00000074825	61.3879	7.48733	0.968749	7.72887	1.08506e-14	1.88576e-13	Itpripl1	5.5946	3.71337	179.437	48.3219
ENSMUSG00000032231	21.9396	1.10371	0.61875	1.78378	0.0744602	0.135678	Anxa2	-0.787169	3.70861	2.14907	0.57948
ENSMUSG00000020876	96.2933	1.61843	0.379476	4.26492	1.99977e-05	0.00010339	Snx11	-0.27001	3.70236	3.07042	0.829314
ENSMUSG00000025498	36.8161	3.39423	0.598203	5.67405	1.39459e-08	1.25076e-07	Irf7	1.50656	3.70039	10.514	2.84131
ENSMUSG00000041939	62.3635	1.31393	0.613494	2.14172	0.0322156	0.0682662	Mvk	-0.573125	3.69881	2.48619	0.672159
ENSMUSG00000021702	3.44774	0.831918	1.44328	0.576408	0.56434	NA	Thbs4	-1.05396	3.69577	1.78005	0.481646
ENSMUSG00000046215	286.278	-0.0154355	0.265183	-0.058207	0.953584	0.969199	Rprml	-1.89994	3.69226	0.989358	0.267955
ENSMUSG00000041000	13.571	0.0790608	0.767011	0.103076	0.917902	0.944201	Trim62	-1.8051	3.69139	1.05633	0.28616
ENSMUSG00000024830	30.1756	1.32609	0.615089	2.15593	0.031089	0.0663997	Rps6kb2	-0.557863	3.69085	2.50722	0.679308
ENSMUSG00000030091	13.188	-0.599552	0.924383	-0.648597	0.516599	0.624379	Nup210	-2.48326	3.69021	0.659959	0.17884
ENSMUSG00000026458	885.139	4.80673	0.306148	15.7007	1.49618e-55	1.62515e-53	Ppfia4	2.925	3.68518	27.988	7.59474
ENSMUSG00000049922	36.9173	2.42492	0.515155	4.70717	2.51176e-06	1.55081e-05	Slc35c1	0.543973	3.68318	5.37	1.45798
ENSMUSG00000021136	14.7698	-0.0583523	0.822593	-0.070937	0.943448	0.96237	Smoc1	-1.93853	3.6812	0.96036	0.260882
ENSMUSG00000052374	7.40056	0.069121	1.35008	0.0511976	0.959168	0.972995	Actn2	-1.80956	3.67738	1.04908	0.285278
ENSMUSG00000062252	18.1749	-1.38322	0.726537	-1.90386	0.0569287	0.109515	Lhfpl5	-3.26053	3.67389	0.383362	0.104348
ENSMUSG00000056952	63.7709	2.63708	0.445031	5.9256	3.11165e-09	3.00929e-08	Tatdn2	0.763283	3.66495	6.22069	1.69735
ENSMUSG00000031431	289.931	1.38591	0.293853	4.71635	2.40117e-06	1.48723e-05	Tsc22d3	-0.487452	3.66386	2.61337	0.713284
ENSMUSG00000025735	107.765	-0.727142	0.405592	-1.79279	0.0730065	0.133551	Rhbdl1	-2.60003	3.66264	0.604099	0.164935
ENSMUSG00000051506	41.9203	5.84987	0.772702	7.57067	3.71312e-14	6.16105e-13	Wdfy4	3.97736	3.6617	57.675	15.7509
ENSMUSG00000024335	217.371	1.68014	0.391763	4.28866	1.79753e-05	9.38028e-05	Brd2	-0.188691	3.65236	3.20459	0.877401
ENSMUSG00000024847	186.559	1.61895	0.360057	4.49637	6.91225e-06	3.90972e-05	Aip	-0.249658	3.65181	3.07152	0.841096
ENSMUSG00000016624	10.2064	-0.149286	1.47607	-0.101138	0.919441	0.945391	Phf21b	-2.01713	3.64986	0.901696	0.247049
ENSMUSG00000058743	7.62331	-1.01975	1.0269	-0.993041	0.32069	0.433162	Kcnj14	-2.88747	3.64954	0.493201	0.135141
ENSMUSG00000046711	358.401	1.12467	0.385302	2.91892	0.00351242	0.0104845	Hmga1	-0.741492	3.64561	2.18051	0.59812
ENSMUSG00000034324	8.16795	-0.46734	1.04939	-0.445346	0.65607	0.745265	Tmem132c	-2.33252	3.64314	0.723297	0.198536
ENSMUSG00000048481	77.2925	-0.0157374	0.480281	-0.0327671	0.97386	0.982787	Mypop	-1.88012	3.64111	0.989151	0.271662
ENSMUSG00000026643	60.8546	0.76482	0.642422	1.19053	0.23384	0.339042	Nmt2	-1.0993	3.64045	1.69916	0.466744
ENSMUSG00000046096	7.27961	0.823276	1.56356	0.526538	0.598514	0.695234	Mosmo	-1.04055	3.63972	1.76942	0.486142
ENSMUSG00000030110	15.8986	-0.589285	0.745862	-0.790073	0.429485	0.542393	Ret	-2.45053	3.63321	0.664672	0.182944
ENSMUSG00000071234	82.6505	-0.375884	0.386265	-0.973124	0.330492	0.443368	Syndig1l	-2.23552	3.62915	0.770633	0.212345
ENSMUSG00000001829	50.9177	1.14927	0.484973	2.36977	0.0177994	0.0419202	Clpb	-0.709388	3.62671	2.21802	0.61158
ENSMUSG00000055762	405.614	3.16924	0.229729	13.7956	2.70892e-43	1.92596e-41	Eef1d	1.31118	3.62521	8.99575	2.48145
ENSMUSG00000023266	22.162	-0.207451	0.756589	-0.274193	0.783936	0.845098	Frs3	-2.06536	3.62481	0.866066	0.238927
ENSMUSG00000036995	19.1825	4.90553	0.951614	5.15496	2.53687e-07	1.9016e-06	Asap3	3.04772	3.62456	29.9717	8.26905
ENSMUSG00000028445	369.133	-0.14488	0.376591	-0.384715	0.700449	0.781006	Enho	-2.00262	3.62439	0.904455	0.249547
ENSMUSG00000026890	10.4029	-0.601824	0.922447	-0.652421	0.514129	0.622266	Lhx6	-2.45948	3.62419	0.65892	0.181812
ENSMUSG00000050138	93.2661	2.38372	0.409351	5.82317	5.77414e-09	5.38018e-08	Kcnk12	0.527131	3.6215	5.2188	1.44106
ENSMUSG00000034748	9.74346	1.6865	1.11204	1.51658	0.129374	0.213427	Sirt6	-0.169435	3.61986	3.21874	0.889191
ENSMUSG00000033256	67.593	0.620563	0.556924	1.11427	0.265164	0.374054	Shf	-1.23312	3.61423	1.53748	0.425395
ENSMUSG00000001415	89.1527	1.64232	0.527935	3.11084	0.00186558	0.00601149	Smg5	-0.21076	3.6127	3.12167	0.864082
ENSMUSG00000022091	6.51721	-0.337278	1.14984	-0.293326	0.769273	0.834351	Sorbs3	-2.18572	3.60111	0.791533	0.219802
ENSMUSG00000028454	13.7468	1.31572	0.91805	1.43317	0.151809	0.242229	Pigo	-0.531962	3.59922	2.48927	0.691614
ENSMUSG00000063730	3.41179	1.42263	1.80777	0.786951	0.431311	NA	Hsd3b2	-0.424903	3.59883	2.68073	0.744889
ENSMUSG00000023827	147.822	-0.451344	0.324112	-1.39256	0.163754	0.257024	Agpat4	-2.29692	3.59397	0.731361	0.203497
ENSMUSG00000026475	25.1087	-0.634085	0.599451	-1.05778	0.290158	0.401374	Rgs16	-2.47923	3.59289	0.644349	0.17934
ENSMUSG00000031872	48.7923	-0.665459	0.511021	-1.30222	0.192843	0.292714	Bean1	-2.50952	3.5902	0.630488	0.175614
ENSMUSG00000039533	143.438	-0.174403	0.291784	-0.597714	0.550031	0.653012	Mmd2	-2.01796	3.58895	0.886134	0.246906
ENSMUSG00000027422	709.059	4.90415	0.250734	19.5591	3.44834e-85	8.98945e-83	Rrbp1	3.06169	3.5862	29.943	8.34953
ENSMUSG00000044469	11.3199	-0.94293	0.878462	-1.07339	0.283097	0.393252	Tnfaip8l1	-2.78462	3.5843	0.520175	0.145126
ENSMUSG00000031960	219.822	2.21454	0.311451	7.1104	1.15711e-12	1.66348e-11	Aars	0.372883	3.58422	4.64134	1.29494
ENSMUSG00000046834	2.92157	-1.71317	1.81418	-0.944318	0.345007	NA	Krt1	-3.55472	3.58395	0.30499	0.0850989
ENSMUSG00000027875	6.47394	-1.22644	1.14762	-1.06868	0.285215	0.395538	Hmgcs2	-3.06786	3.58363	0.427372	0.119257
ENSMUSG00000053137	6.16338	0.0840904	1.81136	0.0464238	0.962972	0.975445	Mapk11	-1.75714	3.58314	1.06002	0.295835
ENSMUSG00000026548	82.2645	7.52078	0.771238	9.75157	1.81638e-22	5.28732e-21	Slamf9	5.68015	3.58169	183.646	51.2736
ENSMUSG00000026546	2.87074	-1.91253	1.76046	-1.08638	0.277311	NA	Cfap45	-3.75165	3.57793	0.265627	0.0742406
ENSMUSG00000005204	54.5905	1.69169	0.496511	3.40717	0.000656413	0.00239738	Senp3	-0.146605	3.57588	3.23036	0.903374
ENSMUSG00000048747	3.52839	-1.00705	1.54461	-0.651982	0.514413	NA	NA	-2.84531	3.57576	0.497561	0.139148
ENSMUSG00000006998	65.5826	1.31094	0.558949	2.34536	0.0190087	0.0442556	Psmd2	-0.526318	3.57329	2.48102	0.694325
ENSMUSG00000050822	27.7153	-0.648239	0.649098	-0.998677	0.317951	0.430447	Slc29a4	-2.48537	3.573	0.638059	0.178578
ENSMUSG00000024772	107.479	1.10673	0.339162	3.26314	0.00110186	0.00379058	Ehd1	-0.730129	3.57232	2.15357	0.60285
ENSMUSG00000045007	78.4617	-0.632259	0.513241	-1.2319	0.217988	0.321744	Tubg2	-2.46895	3.5719	0.645165	0.180623
ENSMUSG00000042190	342.785	7.38726	0.491612	15.0266	4.9145e-51	4.53952e-49	Cmklr1	5.55113	3.57053	167.413	46.8873
ENSMUSG00000056413	332.508	0.142613	0.302109	0.472057	0.636886	0.72834	Adap1	-1.69333	3.57005	1.1039	0.309212
ENSMUSG00000003429	1234.61	2.33036	0.42509	5.48204	4.20442e-08	3.53817e-07	Rps11	0.495111	3.56833	5.02932	1.40943
ENSMUSG00000024033	7.64104	-0.323867	1.06076	-0.305315	0.760126	0.828105	Rsph1	-2.15614	3.56097	0.798926	0.224356
ENSMUSG00000011267	6.62834	0.373562	1.1292	0.330818	0.740782	0.812767	Zfp296	-1.45798	3.55917	1.29555	0.364002
ENSMUSG00000024957	9.84857	-0.938655	1.02205	-0.918408	0.358406	0.471563	Kcnk4	-2.76993	3.5585	0.521719	0.146612
ENSMUSG00000053226	24.8445	0.820919	0.593128	1.38405	0.166343	0.260322	Dand5	-1.01004	3.55772	1.76653	0.496534
ENSMUSG00000059991	14.2574	-1.18664	0.829826	-1.42999	0.152719	0.243458	Nptx2	-3.01477	3.55077	0.439323	0.123726
ENSMUSG00000002771	4.95805	-0.565168	1.20216	-0.470129	0.638263	0.729417	Grin2d	-2.39318	3.55049	0.675877	0.190362
ENSMUSG00000032556	6.91305	-0.783835	1.12601	-0.696119	0.486354	0.597102	Bfsp2	-2.61103	3.54846	0.580821	0.163683
ENSMUSG00000036306	27.1809	-0.316232	0.629409	-0.502427	0.615367	0.709541	Lzts1	-2.1432	3.54791	0.803165	0.226377
ENSMUSG00000060279	122.087	0.795069	0.343999	2.31125	0.0208188	0.0476909	Ap2a1	-1.03181	3.54768	1.73516	0.489097
ENSMUSG00000041957	2.79928	-1.91627	1.80609	-1.06101	0.288687	NA	Pkp2	-3.74265	3.54647	0.264939	0.074705
ENSMUSG00000039850	37.6011	1.14804	0.538797	2.13075	0.0331096	0.0698702	Endov	-0.678212	3.54615	2.21613	0.624939
ENSMUSG00000030678	3.40278	0.32941	1.82229	0.180768	0.85655	NA	Maz	-1.49551	3.54287	1.2565	0.354656
ENSMUSG00000046861	37.6234	1.32194	0.555907	2.37799	0.0174072	0.0411876	Hectd3	-0.499462	3.53425	2.50003	0.707371
ENSMUSG00000024180	20.3666	-0.125292	0.645569	-0.19408	0.846114	0.891242	Tmem8	-1.94635	3.5334	0.916819	0.259472
ENSMUSG00000056972	2.08949	-2.48376	2.27547	-1.09154	0.275036	NA	Magel2	-4.3042	3.53189	0.178777	0.0506181
ENSMUSG00000032122	133.756	7.41196	0.582177	12.7315	3.9542e-37	2.25178e-35	Slc37a2	5.59195	3.53083	170.303	48.2331
ENSMUSG00000024665	6.46984	-0.214483	1.07699	-0.19915	0.842145	0.888817	Fads2	-2.03437	3.53053	0.861855	0.244115
ENSMUSG00000028689	14.1339	2.50529	0.873757	2.86726	0.00414048	0.0120466	Ccdc163	0.685451	3.53041	5.67762	1.6082
ENSMUSG00000024871	88.0109	-0.366092	0.474909	-0.770868	0.440785	0.553743	Doc2g	-2.1843	3.52644	0.775881	0.220019
ENSMUSG00000042642	41.4219	1.66277	0.482561	3.44572	0.000569549	0.00211169	Flad1	-0.153999	3.52291	3.16623	0.898756
ENSMUSG00000051617	4.67297	0.498941	1.28962	0.38689	0.698837	0.77958	Krt9	-1.31748	3.52206	1.41318	0.401236
ENSMUSG00000103906	8.45288	1.00196	0.971318	1.03154	0.302286	0.414169	Tigd5	-0.813934	3.52077	2.00272	0.568829
ENSMUSG00000042724	12.1453	2.35909	0.877923	2.68713	0.00720696	0.019458	Map3k9	0.543296	3.52054	5.13047	1.4573
ENSMUSG00000061894	3.88837	1.46184	1.32763	1.10109	0.270858	0.380761	Zscan20	-0.350801	3.51286	2.7546	0.784149
ENSMUSG00000048280	9.06524	2.95324	1.52213	1.94021	0.0523547	0.102226	Zfp738	1.14109	3.51164	7.74486	2.20548
ENSMUSG00000037166	64.9754	-0.727383	0.41243	-1.76365	0.0777907	0.140454	Ppp1r14a	-2.53903	3.51042	0.603998	0.172059
ENSMUSG00000031111	12.2297	-0.986423	0.913191	-1.08019	0.280056	0.389951	Igsf1	-2.79797	3.5102	0.504728	0.143789
ENSMUSG00000044165	3.38033	-3.72925	1.95446	-1.90807	0.0563819	NA	Bcl2l15	-5.54071	3.50999	0.0754023	0.0214822
ENSMUSG00000041559	23.5818	0.302087	0.603437	0.500611	0.616645	0.710805	Fmod	-1.50899	3.50903	1.23293	0.351358
ENSMUSG00000020810	207.401	-0.709313	0.304148	-2.33213	0.019694	0.0455951	Cygb	-2.51776	3.50265	0.611611	0.174614
ENSMUSG00000051499	2.96302	-0.977516	1.67841	-0.582408	0.560292	NA	Zfp786	-2.7853	3.50105	0.507853	0.145057
ENSMUSG00000090862	301.097	2.80995	0.342827	8.19641	2.47666e-16	4.94951e-15	Rps13	1.00299	3.49905	7.01261	2.00414
ENSMUSG00000035722	29.2256	2.07586	0.593237	3.49921	0.00046664	0.00177042	Abca7	0.268975	3.49886	4.21596	1.20495
ENSMUSG00000075600	36.9213	2.09497	0.509597	4.11103	3.93893e-05	0.000190547	Zc3h3	0.289017	3.4966	4.27217	1.22181
ENSMUSG00000029449	33.7718	-0.632311	0.556603	-1.13602	0.255949	0.364024	Rhof	-2.43826	3.49659	0.645142	0.184506
ENSMUSG00000070802	438.903	0.268056	0.352179	0.761137	0.446575	0.55928	Pnmal2	-1.53779	3.49633	1.20418	0.344413
ENSMUSG00000073471	5.01076	0.441491	1.34444	0.328384	0.742621	0.814253	Rsph3a	-1.36435	3.49633	1.35801	0.388409
ENSMUSG00000074652	5.92578	0.238401	1.41712	0.168229	0.866403	0.90664	Myh7b	-1.56636	3.49372	1.17968	0.337659
ENSMUSG00000035206	57.0558	0.59436	0.47674	1.24672	0.212501	0.31571	Sppl2b	-1.20992	3.49254	1.5098	0.432294
ENSMUSG00000024170	37.2813	2.13377	0.517325	4.12462	3.71344e-05	0.000180682	Telo2	0.331264	3.48826	4.38863	1.25811
ENSMUSG00000064125	14.5441	-0.728468	0.798622	-0.912156	0.361686	0.475134	Prr36	-2.53053	3.48719	0.603544	0.173075
ENSMUSG00000026203	99.6071	0.93463	0.356487	2.62178	0.00874719	0.0229971	Dnajb2	-0.866209	3.48423	1.9114	0.548586
ENSMUSG00000040146	8.78304	2.82933	1.8338	1.54288	0.122859	0.204521	Rgl3	1.02963	3.48149	7.10745	2.0415
ENSMUSG00000075410	17.1094	-0.670701	0.73783	-0.909019	0.36334	0.476932	Prcd	-2.46995	3.4804	0.628201	0.180497
ENSMUSG00000038742	17.5241	0.294485	0.780544	0.377281	0.705965	0.784649	Angptl6	-1.50472	3.48028	1.22645	0.352399
ENSMUSG00000040610	9.58259	-0.186392	0.922817	-0.201982	0.839931	0.887039	Tlx3	-1.98553	3.48012	0.878801	0.25252
ENSMUSG00000024222	140.731	3.39173	0.340576	9.95879	2.30859e-23	7.08954e-22	Fkbp5	1.59594	3.47206	10.4957	3.02291
ENSMUSG00000058498	3.80029	-1.26916	1.44764	-0.876708	0.380645	0.494064	Rnf207	-3.06316	3.46774	0.414901	0.119646
ENSMUSG00000025856	207.394	0.903948	0.300104	3.01212	0.00259433	0.00806842	Pdgfa	-0.889604	3.46667	1.87118	0.539762
ENSMUSG00000029512	83.7537	0.700116	0.400917	1.74629	0.0807612	0.144621	Ulk1	-1.09233	3.46402	1.62464	0.469002
ENSMUSG00000031545	213.69	1.83527	0.260793	7.03729	1.96014e-12	2.76375e-11	Gpat4	0.0439713	3.46127	3.56839	1.03095
ENSMUSG00000026179	381.82	0.74779	0.29299	2.55227	0.0107024	0.0272256	Pnkd	-1.04318	3.46047	1.67922	0.485257
ENSMUSG00000031511	128.651	1.29499	0.327697	3.95179	7.75683e-05	0.000351294	Arhgef7	-0.495822	3.4601	2.45375	0.709157
ENSMUSG00000031750	23.1189	-0.422926	0.65497	-0.645717	0.518462	0.62573	Il34	-2.21335	3.45917	0.74591	0.215633
ENSMUSG00000017188	263.409	0.884868	0.246347	3.59195	0.000328213	0.00128765	Coa3	-0.904837	3.45744	1.8466	0.534093
ENSMUSG00000024427	10.723	-0.858051	0.968915	-0.885579	0.375845	0.489441	Spry4	-2.64752	3.45688	0.551697	0.159594
ENSMUSG00000045983	191.189	2.03185	0.26859	7.56489	3.8819e-14	6.42293e-13	Eif4g1	0.242422	3.45679	4.0893	1.18298
ENSMUSG00000022577	1070.23	-0.258184	0.315959	-0.817144	0.413846	0.527011	Ly6h	-2.04654	3.45422	0.83614	0.242063
ENSMUSG00000011877	340.903	0.57746	0.358204	1.6121	0.10694	0.182672	Git1	-1.20996	3.45198	1.49222	0.432279
ENSMUSG00000047721	431.716	1.99862	0.234967	8.50599	1.80046e-17	3.91133e-16	Bola2	0.211639	3.45093	3.99619	1.158
ENSMUSG00000079487	58.353	3.06838	0.469096	6.54106	6.10862e-11	7.34224e-10	Med12	1.28145	3.4508	8.38834	2.43084
ENSMUSG00000026437	62.4436	-0.404359	0.425369	-0.950608	0.341803	0.454803	Cdk18	-2.19048	3.44886	0.755572	0.219078
ENSMUSG00000023046	78.3807	-0.105149	0.391771	-0.268394	0.788396	0.848467	Igfbp6	-1.8912	3.44871	0.929709	0.269582
ENSMUSG00000039860	45.1563	-0.544503	0.479366	-1.13588	0.256005	0.364024	Srrm3	-2.33018	3.4478	0.685627	0.19886
ENSMUSG00000025224	133.53	0.708893	0.313773	2.25925	0.0238677	0.0534335	Gbf1	-1.07646	3.44704	1.63455	0.47419
ENSMUSG00000078440	435.735	1.05304	0.256042	4.11275	3.90969e-05	0.000189367	Dohh	-0.73217	3.44668	2.0749	0.601998
ENSMUSG00000018599	18.6084	0.831953	0.691651	1.20285	0.229034	0.333806	Mief2	-0.953128	3.44638	1.78009	0.516511
ENSMUSG00000024851	253.866	0.573713	0.293806	1.95269	0.0508559	0.099781	Pitpnm1	-1.20957	3.44209	1.48835	0.432398
ENSMUSG00000086596	2.95665	-2.05232	1.75325	-1.17058	0.241767	NA	Susd5	-3.83518	3.44108	0.241097	0.0700642
ENSMUSG00000020921	95.5967	1.61412	0.375151	4.3026	1.68805e-05	8.86417e-05	Tmem101	-0.168294	3.44002	3.06126	0.889894
ENSMUSG00000013858	538.259	1.62875	0.229095	7.10951	1.16452e-12	1.67004e-11	Tmem259	-0.152946	3.43831	3.09245	0.899412
ENSMUSG00000046714	4.27377	-0.332619	1.32172	-0.251655	0.801307	0.857129	Foxc2	-2.11424	3.43811	0.794094	0.230968
ENSMUSG00000003500	99.5083	-0.0812943	0.403941	-0.201253	0.840501	0.887481	Impdh1	-1.8624	3.4369	0.945209	0.275018
ENSMUSG00000018012	94.7294	1.68181	0.451943	3.72129	0.000198207	0.000820745	Rac3	-0.0989724	3.43612	3.2083	0.933698
ENSMUSG00000001576	152.622	1.3249	0.293887	4.5082	6.53787e-06	3.71768e-05	Ergic1	-0.455796	3.43592	2.50516	0.729108
ENSMUSG00000063576	595.362	0.786402	0.345451	2.27645	0.0228189	0.0514885	Klhdc3	-0.992428	3.43148	1.72477	0.502631
ENSMUSG00000053166	71.467	-0.174695	0.475527	-0.367373	0.713341	0.790647	Cdh22	-1.95346	3.43132	0.885955	0.258196
ENSMUSG00000056900	21.3376	-0.0379465	0.834602	-0.0454666	0.963735	0.975835	Usp13	-1.81662	3.4311	0.97404	0.283885
ENSMUSG00000037278	29.2926	0.729691	0.553706	1.31783	0.18756	0.286406	Tmem97	-1.04697	3.42633	1.65828	0.483983
ENSMUSG00000078572	296.292	1.48489	0.265314	5.59671	2.18453e-08	1.90959e-07	Ndufaf8	-0.288887	3.41948	2.79896	0.818534
ENSMUSG00000071604	10.8409	-0.293024	0.865848	-0.338425	0.735043	0.808437	Fam189a2	-2.06637	3.41845	0.816189	0.23876
ENSMUSG00000064264	176.721	-0.159158	0.374047	-0.425502	0.670471	0.757337	Zfp428	-1.93187	3.41695	0.895548	0.26209
ENSMUSG00000009406	41.8031	-0.650362	0.503176	-1.29251	0.196179	0.296608	Elk1	-2.42216	3.4148	0.63712	0.186576
ENSMUSG00000033712	3.70906	1.4576	2.01739	0.722517	0.469977	0.581878	Ccar2	-0.313897	3.41407	2.7465	0.804466
ENSMUSG00000066036	52.37	0.51671	0.473182	1.09199	0.274837	0.385014	Ubr4	-1.2547	3.41389	1.43069	0.419079
ENSMUSG00000001910	310.309	1.60159	0.364817	4.39012	1.13288e-05	6.16409e-05	Nacc1	-0.168476	3.4107	3.03478	0.889782
ENSMUSG00000029416	169.661	3.0298	0.313908	9.65188	4.82616e-22	1.36423e-20	Slc15a4	1.26003	3.41	8.16696	2.395
ENSMUSG00000015312	103.264	-0.0372868	0.400064	-0.093202	0.925743	0.949633	Gadd45b	-1.8068	3.40939	0.974486	0.285824
ENSMUSG00000037348	238.91	1.83819	0.289916	6.34042	2.29135e-10	2.55755e-09	Paqr7	0.0686897	3.40936	3.57562	1.04876
ENSMUSG00000004929	22.2347	1.04702	0.623925	1.67812	0.0933234	0.163132	Thop1	-0.721922	3.40804	2.06626	0.606289
ENSMUSG00000048385	425.766	-0.280691	0.47129	-0.595581	0.551455	0.654239	Scrt1	-2.04938	3.40745	0.823196	0.241587
ENSMUSG00000029093	17.9378	-0.577151	0.753106	-0.766361	0.443462	0.55645	Sorcs2	-2.34565	3.40698	0.670286	0.196739
ENSMUSG00000026279	43.3075	2.03085	0.542369	3.7444	0.000180826	0.000754899	Thap4	0.262943	3.40558	4.08644	1.19992
ENSMUSG00000066687	3.92688	1.36134	1.74511	0.78009	0.435338	0.54825	Zbtb16	-0.405695	3.40355	2.56924	0.754873
ENSMUSG00000044499	6.56325	-3.05	1.42252	-2.14408	0.0320262	0.0679754	Hs3st5	-4.81672	3.4028	0.120742	0.0354831
ENSMUSG00000013822	269.364	1.63802	0.407992	4.01484	5.94872e-05	0.000276813	Elof1	-0.128585	3.40253	3.11239	0.914728
ENSMUSG00000002763	170.66	1.96998	0.332577	5.92336	3.15422e-09	3.04795e-08	Pex6	0.2035	3.40222	3.91762	1.15149
ENSMUSG00000003575	124.41	0.0967312	0.411898	0.234843	0.814331	0.866713	Crtc1	-1.66937	3.40134	1.06935	0.31439
ENSMUSG00000042388	203.785	-0.560953	0.544958	-1.02935	0.303315	0.415257	Dlgap3	-2.32463	3.39563	0.677854	0.199626
ENSMUSG00000061411	40.7846	1.51178	0.502586	3.00801	0.00262968	0.00816104	Nol4l	-0.251363	3.39437	2.85162	0.840102
ENSMUSG00000044080	136.725	0.764581	0.375789	2.0346	0.0418907	0.0848593	S100a1	-0.996223	3.38887	1.69888	0.501311
ENSMUSG00000052026	51.7929	-0.826715	0.528101	-1.56545	0.117478	0.197186	Slc6a7	-2.5865	3.38647	0.563812	0.16649
ENSMUSG00000009995	108.938	2.66607	0.332322	8.02255	1.0357e-15	1.96598e-14	Taz	0.906379	3.38626	6.34698	1.87434
ENSMUSG00000022416	31.3579	-0.608674	0.620054	-0.981648	0.326273	0.439287	Cacna1i	-2.36731	3.38377	0.655799	0.193807
ENSMUSG00000031706	21.8635	2.31217	0.710034	3.25642	0.00112826	0.00386781	Rfx1	0.553874	3.38299	4.9663	1.46802
ENSMUSG00000027327	101.232	0.414481	0.434901	0.953045	0.340567	0.453587	1700037H04Rik	-1.34217	3.37912	1.33282	0.394428
ENSMUSG00000053963	90.7584	-0.811225	0.370154	-2.19159	0.0284092	0.0617393	Stum	-2.56742	3.37806	0.569898	0.168705
ENSMUSG00000036606	806.159	5.3721	0.239191	22.4594	1.03469e-111	4.1855e-109	Plxnb2	3.61652	3.37661	41.4154	12.2654
ENSMUSG00000044716	22.7839	-1.22322	0.766553	-1.59574	0.110547	0.187755	Dok7	-2.97877	3.37655	0.428326	0.126853
ENSMUSG00000028919	6.14225	-0.336806	1.225	-0.274943	0.78336	0.844632	Arhgef19	-2.09216	3.3761	0.791792	0.234529
ENSMUSG00000028039	99.1416	-1.769	0.37158	-4.76074	1.92881e-06	1.21454e-05	Efna3	-3.52394	3.37512	0.293412	0.0869338
ENSMUSG00000022436	324.151	1.3924	0.331266	4.20326	2.63093e-05	0.000132461	Sh3bp1	-0.361581	3.37287	2.62515	0.778311
ENSMUSG00000020747	14.0499	1.41531	0.775046	1.8261	0.0678348	0.125774	Tmem94	-0.338046	3.37143	2.66718	0.791112
ENSMUSG00000021215	33.967	-0.804646	0.545195	-1.47589	0.139974	0.227373	Net1	-2.5576	3.37047	0.572503	0.169858
ENSMUSG00000026319	18.8915	2.01084	0.785689	2.55933	0.0104874	0.0267858	Relch	0.259504	3.3667	4.03016	1.19707
ENSMUSG00000022553	233.956	2.10528	0.309425	6.80384	1.01865e-11	1.32189e-10	Maf1	0.354362	3.36572	4.3028	1.27842
ENSMUSG00000014329	9.03061	-1.55752	1.0223	-1.52355	0.127622	0.211013	Bicc1	-3.30729	3.36304	0.339734	0.10102
ENSMUSG00000056665	67.1122	0.167546	0.486124	0.344657	0.730352	0.804688	Them6	-1.58147	3.3613	1.12315	0.334141
ENSMUSG00000019907	17.3432	0.35607	0.842814	0.422477	0.672677	0.759278	Ppp1r12a	-1.39182	3.35866	1.27993	0.381085
ENSMUSG00000027230	12.3754	1.16954	0.953025	1.22719	0.219753	0.323532	Creb3l1	-0.577773	3.35732	2.2494	0.669997
ENSMUSG00000042328	226.849	4.45205	0.294804	15.1017	1.57708e-51	1.48006e-49	Hps4	2.7058	3.35486	21.8877	6.52418
ENSMUSG00000027936	50.9483	2.16175	0.472499	4.57514	4.75893e-06	2.77746e-05	Crtc2	0.416265	3.35308	4.47458	1.33447
ENSMUSG00000042766	48.4379	-0.235179	0.567864	-0.414146	0.678767	0.7638	Trim46	-1.98002	3.35158	0.84958	0.253486
ENSMUSG00000002329	149.791	0.797539	0.338526	2.35591	0.0184772	0.0432523	Mdp1	-0.94706	3.35102	1.73813	0.518688
ENSMUSG00000038963	36.2852	3.68032	0.576861	6.37989	1.7721e-10	2.01439e-09	Slco4a1	1.93715	3.3477	12.8199	3.82948
ENSMUSG00000020471	42.2395	1.97784	0.530956	3.72505	0.000195278	0.000808902	Pold2	0.234724	3.34757	3.93902	1.17668
ENSMUSG00000019066	24.5208	1.08134	0.600588	1.80047	0.0717871	0.131748	Rab3d	-0.661366	3.34662	2.116	0.632279
ENSMUSG00000018634	33.2062	-0.356792	0.573717	-0.621896	0.53401	0.638906	Crhr1	-2.09942	3.34644	0.780899	0.233352
ENSMUSG00000048503	8.0705	-2.84541	1.28551	-2.21344	0.026867	0.0589115	Tmem136	-4.58795	3.34623	0.139138	0.0415805
ENSMUSG00000001909	102.024	1.97266	0.458182	4.3054	1.66681e-05	8.76833e-05	Trmt1	0.230208	3.34603	3.92491	1.173
ENSMUSG00000058441	123.102	-0.350876	0.465891	-0.75313	0.451372	0.563773	Panx2	-2.09332	3.34601	0.784108	0.234341
ENSMUSG00000035397	41.8174	1.14959	0.527655	2.17868	0.0293554	0.0633496	Klf16	-0.591934	3.34389	2.21851	0.663453
ENSMUSG00000030849	12.2516	-0.555204	0.87855	-0.631955	0.527416	0.633602	Fgfr2	-2.29634	3.34298	0.680561	0.203579
ENSMUSG00000039908	7.68371	0.672963	1.01351	0.663994	0.506694	0.615452	Slc26a11	-1.06732	3.34102	1.59434	0.477203
ENSMUSG00000027895	69.0516	-0.575919	0.397459	-1.449	0.147337	0.236727	Kcnc4	-2.31615	3.34089	0.670859	0.200802
ENSMUSG00000050002	87.5917	1.77404	0.3952	4.48898	7.15661e-06	4.03102e-05	Idnk	0.0339326	3.34061	3.42011	1.0238
ENSMUSG00000078137	10.414	-0.374111	0.954844	-0.391803	0.695204	0.776521	Ankrd63	-2.11342	3.33875	0.771581	0.231099
ENSMUSG00000035632	66.7707	1.85629	0.387402	4.79165	1.65413e-06	1.05174e-05	Cnot3	0.117308	3.33801	3.62077	1.08471
ENSMUSG00000039483	105.82	1.30311	0.362402	3.59575	0.000323464	0.00127138	Asb6	-0.43575	3.3377	2.46759	0.739309
ENSMUSG00000035067	6.95407	1.3379	1.54942	0.863484	0.387871	0.501446	Xkr6	-0.400608	3.33689	2.52782	0.757539
ENSMUSG00000029544	246.919	0.0757013	0.370847	0.204131	0.838251	0.885584	Cabp1	-1.66069	3.332	1.05387	0.316289
ENSMUSG00000067288	1773.4	2.32922	0.354288	6.57437	4.88599e-11	5.95198e-10	Rps28	0.593978	3.32935	5.02533	1.5094
ENSMUSG00000026121	45.8694	2.73256	0.512687	5.32989	9.82745e-08	7.81599e-07	Sema4c	0.998455	3.32674	6.64635	1.99786
ENSMUSG00000005338	369.937	-0.533757	0.297589	-1.79361	0.0728757	0.13337	Cadm3	-2.26756	3.32602	0.690753	0.207681
ENSMUSG00000044533	1156.63	1.79166	0.254125	7.05033	1.78495e-12	2.5228e-11	Rps2	0.0590238	3.32335	3.46213	1.04176
ENSMUSG00000037096	7.894	2.11282	2.0092	1.05157	0.292995	0.404225	NA	0.380775	3.32198	4.32535	1.30204
ENSMUSG00000023249	14.6562	1.07349	0.764447	1.40427	0.160238	0.252961	Parp3	-0.657866	3.3204	2.10452	0.633815
ENSMUSG00000067786	441.394	-0.839073	0.32567	-2.57645	0.00998196	0.0256851	Nnat	-2.57016	3.31978	0.559003	0.168385
ENSMUSG00000009828	31.9885	2.5845	0.671116	3.85105	0.000117614	0.000514055	Ick	0.854177	3.31802	5.99808	1.80773
ENSMUSG00000040276	253.955	-0.224617	0.422759	-0.531313	0.595202	0.692378	Pacsin1	-1.95302	3.3136	0.855822	0.258276
ENSMUSG00000002812	139.489	3.12589	0.324282	9.63942	5.44967e-22	1.53309e-20	Flii	1.39787	3.31274	8.72946	2.63511
ENSMUSG00000024426	57.938	0.617615	0.486051	1.27068	0.203842	0.305829	Atat1	-1.10963	3.31094	1.53434	0.463414
ENSMUSG00000041346	31.5705	1.4107	0.543301	2.59654	0.00941673	0.024402	Wrap53	-0.316303	3.31041	2.65867	0.803125
ENSMUSG00000022269	16.7691	-2.2482	0.863302	-2.60419	0.00920918	0.0239594	March11	-3.9751	3.31016	0.210486	0.063588
ENSMUSG00000006517	33.6809	1.02774	0.548451	1.87389	0.0609453	0.115407	Mvd	-0.698719	3.30914	2.03883	0.616119
ENSMUSG00000096472	113.815	-0.566862	0.32153	-1.76302	0.0778979	0.140588	Cdkn2d	-2.29244	3.30712	0.675083	0.20413
ENSMUSG00000056938	63.6907	0.305688	0.539601	0.566508	0.571048	0.671105	Acbd4	-1.41967	3.30662	1.23601	0.373798
ENSMUSG00000024959	137.579	1.5297	0.360459	4.24376	2.19802e-05	0.000112549	Bad	-0.195555	3.30639	2.88726	0.873237
ENSMUSG00000051537	29.4251	-0.436462	0.564407	-0.773311	0.439339	0.55228	Gm5124	-2.16068	3.30401	0.738944	0.223651
ENSMUSG00000041930	22.6176	0.258905	0.652703	0.396666	0.691614	0.773972	Fam222a	-1.46402	3.30105	1.19657	0.362481
ENSMUSG00000012483	7.83401	1.1453	0.975185	1.17445	0.240216	0.346571	Rpa3	-0.576281	3.29799	2.21193	0.67069
ENSMUSG00000040794	675.569	-0.267416	0.27685	-0.965924	0.334082	0.447122	C1qtnf4	-1.98763	3.29484	0.830806	0.252153
ENSMUSG00000022389	461.301	0.182293	0.224225	0.812989	0.416224	0.52935	Tef	-1.53742	3.29371	1.13469	0.3445
ENSMUSG00000038838	30.9248	1.82642	0.672417	2.71619	0.0066037	0.0180536	Vars2	0.108754	3.28903	3.54655	1.0783
ENSMUSG00000007892	14193.2	2.03866	0.182975	11.1418	7.85582e-29	3.17781e-27	Rplp1	0.321942	3.28688	4.10864	1.25001
ENSMUSG00000078681	193.577	1.23976	0.284508	4.35757	1.31515e-05	7.0839e-05	Tm2d3	-0.476822	3.28657	2.3616	0.718559
ENSMUSG00000044005	19.7766	-0.22503	0.691107	-0.325607	0.744721	0.816022	Gls2	-1.93892	3.28044	0.855577	0.260812
ENSMUSG00000004815	18.4236	-0.0758461	0.692015	-0.109602	0.912725	0.940546	Dgkq	-1.78875	3.2782	0.948785	0.289423
ENSMUSG00000027860	17.0813	1.16883	1.112	1.05111	0.293206	0.404434	Vangl1	-0.542266	3.2741	2.2483	0.686692
ENSMUSG00000021285	87.0977	0.673198	0.342691	1.96444	0.0494785	0.0975189	Ppp1r13b	-1.0373	3.27274	1.5946	0.487239
ENSMUSG00000036959	17.4452	0.934758	0.740443	1.26243	0.206794	0.309161	Bcorl1	-0.775524	3.27225	1.91157	0.584177
ENSMUSG00000028364	2.76592	-0.51131	1.91558	-0.266922	0.789529	NA	Tnc	-2.22141	3.27183	0.701585	0.214432
ENSMUSG00000050860	22.5395	-0.0675543	0.698827	-0.096668	0.92299	0.947628	Phospho1	-1.7776	3.27172	0.954254	0.291667
ENSMUSG00000026519	177.661	3.67677	0.304132	12.0894	1.20192e-33	6.02553e-32	Tmem63a	1.96737	3.27025	12.7885	3.91055
ENSMUSG00000066191	13.5049	3.45945	0.909179	3.80503	0.000141789	0.000607497	Anks6	1.75005	3.27024	11.0002	3.36371
ENSMUSG00000063506	70.3567	3.62397	0.444801	8.14738	3.71887e-16	7.30754e-15	Arhgap22	1.91474	3.26985	12.3288	3.77047
ENSMUSG00000013646	111.913	1.07187	0.344216	3.11393	0.00184611	0.00595618	Sh3bp5l	-0.637323	3.26977	2.10215	0.642905
ENSMUSG00000053550	40.7132	-0.345908	0.590075	-0.58621	0.557734	0.659555	Shisa7	-2.05464	3.26874	0.786813	0.240708
ENSMUSG00000029869	63.2134	-0.275683	0.439856	-0.626757	0.530818	0.63671	Ephb6	-1.98346	3.26657	0.826059	0.252883
ENSMUSG00000045752	77.1337	1.86765	0.583043	3.20328	0.0013587	0.00454619	Tssc4	0.160324	3.26556	3.64938	1.11754
ENSMUSG00000050428	12.4537	2.36188	0.968585	2.43848	0.014749	0.0357407	Fbxo46	0.654746	3.26512	5.1404	1.57434
ENSMUSG00000039230	61.3832	1.55224	0.401047	3.87047	0.000108626	0.00047834	Tbcd	-0.15443	3.26406	2.93272	0.898488
ENSMUSG00000032333	75.0936	0.542651	0.388408	1.39712	0.162379	0.255412	Stoml1	-1.16381	3.26359	1.45665	0.446332
ENSMUSG00000040860	9.66619	1.6305	0.927223	1.75848	0.078666	0.141734	Crocc	-0.0752027	3.26188	3.09621	0.949209
ENSMUSG00000033161	794.761	0.826026	0.192497	4.2911	1.77791e-05	9.28613e-05	Atp1a1	-0.879258	3.26093	1.77279	0.543647
ENSMUSG00000036636	84.755	1.74664	0.382422	4.56731	4.94029e-06	2.87616e-05	Clcn7	0.0436819	3.25568	3.35576	1.03074
ENSMUSG00000070343	626.822	2.74845	0.345447	7.95621	1.77384e-15	3.30301e-14	NA	1.0478	3.25048	6.71996	2.06738
ENSMUSG00000059040	332.779	1.75729	0.330169	5.32241	1.02403e-07	8.12781e-07	Eno1b	0.0573835	3.24881	3.38063	1.04058
ENSMUSG00000033857	48.8832	3.79371	0.647603	5.85808	4.68256e-09	4.4335e-08	Engase	2.09585	3.24421	13.8682	4.27476
ENSMUSG00000055436	92.4428	1.63396	0.64563	2.5308	0.0113802	0.0286238	Srsf11	-0.0636018	3.24353	3.10364	0.956872
ENSMUSG00000015980	4.35065	-0.857875	1.57574	-0.544427	0.586148	0.684189	Lrrc27	-2.55471	3.24189	0.551764	0.170198
ENSMUSG00000058905	88.638	3.78746	2.00116	1.89263	0.0584067	0.111773	Gm10051	2.09067	3.24178	13.8082	4.25946
ENSMUSG00000046997	7.52763	-0.384789	1.00277	-0.383726	0.701182	0.781363	Spsb4	-2.08024	3.23878	0.765891	0.236475
ENSMUSG00000050121	53.6844	-1.73889	0.450784	-3.85747	0.000114567	0.000501672	Opalin	-3.43335	3.23656	0.299601	0.0925676
ENSMUSG00000028556	15.3294	1.58908	1.88433	0.843313	0.399054	0.512345	Dock7	-0.105227	3.23621	3.00857	0.929658
ENSMUSG00000050855	17.2805	0.379943	0.716287	0.530434	0.595811	0.692849	Zfp940	-1.31343	3.23411	1.30129	0.402364
ENSMUSG00000102206	16.3878	-1.45732	0.913682	-1.595	0.110712	0.187981	Pcdha11	-3.15042	3.23351	0.364168	0.112623
ENSMUSG00000034768	8.96059	-1.43504	1.08047	-1.32816	0.184125	0.282238	Asb16	-3.12804	3.23329	0.369838	0.114385
ENSMUSG00000036106	22.5663	1.60044	0.635773	2.51732	0.0118253	0.0295909	Prr5	-0.0913066	3.23048	3.03236	0.938672
ENSMUSG00000063320	33.0376	0.34672	0.544821	0.636392	0.524521	0.631158	1190007I07Rik	-1.34491	3.23021	1.27167	0.393679
ENSMUSG00000031562	8.51682	0.218483	0.959247	0.227766	0.819828	0.871142	Dctd	-1.47267	3.22915	1.16351	0.360314
ENSMUSG00000001504	7.33871	-0.879062	1.10872	-0.792863	0.427858	0.540804	Irx2	-2.56867	3.2257	0.543721	0.168559
ENSMUSG00000029778	80.2948	-0.466658	0.382624	-1.21962	0.222607	0.326426	Adcyap1r1	-2.15466	3.2221	0.723639	0.224586
ENSMUSG00000032940	15.9579	-2.16444	0.906625	-2.38736	0.0169699	0.04038	Rbm11	-3.85069	3.21818	0.223069	0.0693151
ENSMUSG00000039632	4.5146	0.0859381	1.34275	0.0640013	0.948969	0.96568	Ccdc151	-1.59816	3.21339	1.06138	0.330299
ENSMUSG00000022580	5.78803	-0.495813	1.33689	-0.37087	0.710734	0.788577	Rhpn1	-2.17858	3.21042	0.709162	0.220894
ENSMUSG00000030499	15.307	-1.12936	0.785044	-1.43859	0.150266	0.240304	Kctd15	-2.8117	3.20949	0.457119	0.142427
ENSMUSG00000035547	42.3107	-0.3458	0.551497	-0.62702	0.530646	0.636634	Capn5	-2.02805	3.20929	0.786872	0.245186
ENSMUSG00000039176	53.5664	2.1279	0.474027	4.48899	7.15615e-06	4.03102e-05	Polg	0.448694	3.20252	4.37081	1.3648
ENSMUSG00000029291	20.9552	0.256283	3.17547	0.080707	0.935675	0.956966	Rufy3	-1.42174	3.19989	1.1944	0.373262
ENSMUSG00000008153	164.618	-0.30136	0.339004	-0.888956	0.374027	0.487686	Clstn3	-1.97779	3.19636	0.811487	0.253878
ENSMUSG00000021541	9.99179	-1.32404	0.959125	-1.38047	0.167442	0.261659	Trpc7	-2.99877	3.19259	0.399414	0.125107
ENSMUSG00000005469	399.788	0.538596	0.296253	1.81802	0.0690604	0.127643	Prkaca	-1.13595	3.1922	1.45256	0.455034
ENSMUSG00000013523	71.2585	-0.777156	0.384479	-2.02132	0.0432462	0.0871086	Bcas1	-2.45104	3.19073	0.583516	0.182878
ENSMUSG00000026784	4.06089	-0.799359	1.44137	-0.554582	0.579181	0.678487	Pdss1	-2.47304	3.19027	0.574604	0.180111
ENSMUSG00000029621	362.443	0.490807	0.253747	1.93424	0.0530841	0.103471	Arpc1a	-1.18105	3.18625	1.40523	0.44103
ENSMUSG00000028833	747.541	-0.270599	0.23575	-1.14782	0.251044	0.358839	Ncdn	-1.94106	3.18316	0.828975	0.260425
ENSMUSG00000022386	32.931	1.56641	0.524402	2.98705	0.00281685	0.0086731	Trmu	-0.103839	3.1827	2.96167	0.930553
ENSMUSG00000025207	36.3538	1.72907	0.584884	2.95625	0.00311402	0.00943699	Sema4g	0.059043	3.1822	3.31513	1.04177
ENSMUSG00000028458	337.127	1.52953	0.309841	4.93649	7.95399e-07	5.39043e-06	Tesk1	-0.139446	3.17988	2.88691	0.907868
ENSMUSG00000034714	13.9224	0.0716347	0.938289	0.0763462	0.939144	0.959343	Ttyh2	-1.59715	3.17947	1.05091	0.330529
ENSMUSG00000022463	275.214	0.240792	0.328758	0.73243	0.463906	0.576248	Srebf2	-1.42522	3.17337	1.18164	0.372362
ENSMUSG00000060240	914.741	-0.101668	0.311043	-0.326863	0.743772	0.815286	Cend1	-1.76753	3.17303	0.931955	0.293711
ENSMUSG00000022761	64.7193	0.691951	0.38574	1.79383	0.0728405	0.133348	Lztr1	-0.973485	3.17209	1.61547	0.509275
ENSMUSG00000021901	135.909	0.770415	0.354492	2.17329	0.0297582	0.0640186	Bap1	-0.892172	3.16584	1.70576	0.538802
ENSMUSG00000029455	311.343	2.01028	0.264144	7.61055	2.7293e-14	4.58702e-13	Aldh2	0.348763	3.1635	4.02862	1.27347
ENSMUSG00000002580	351.346	1.33654	0.281532	4.74737	2.06081e-06	1.28935e-05	Mien1	-0.324962	3.16345	2.52544	0.798319
ENSMUSG00000020836	4.50317	0.341379	1.28083	0.26653	0.789831	0.849365	Coro6	-1.31936	3.16178	1.26697	0.400713
ENSMUSG00000020932	46.9204	-0.441262	0.515353	-0.856233	0.391869	0.505555	Gfap	-2.10097	3.15953	0.73649	0.233101
ENSMUSG00000029596	10.5664	-0.227739	0.868058	-0.262354	0.793048	0.851556	Sdsl	-1.88743	3.15948	0.853972	0.270289
ENSMUSG00000020700	35.1268	3.971	0.605311	6.56026	5.37138e-11	6.49604e-10	Map3k3	2.3116	3.15885	15.6815	4.96433
ENSMUSG00000013419	58.761	0.018391	0.404914	0.0454196	0.963773	0.975835	Zfp651	-1.63912	3.15473	1.01283	0.321051
ENSMUSG00000030835	118.022	0.71185	0.375287	1.89682	0.0578522	0.110911	Nomo1	-0.945045	3.15337	1.6379	0.519413
ENSMUSG00000047824	129.753	2.04662	0.313874	6.52051	7.00674e-11	8.37881e-10	Pygo2	0.391191	3.15016	4.13136	1.31148
ENSMUSG00000053310	4963.34	-0.543569	0.287751	-1.88902	0.0588886	0.112475	Nrgn	-2.1972	3.14624	0.686071	0.218061
ENSMUSG00000047123	42.4457	3.85935	0.698525	5.525	3.29482e-08	2.81102e-07	Ticam1	2.20631	3.14497	14.5138	4.61492
ENSMUSG00000031302	15.321	0.0994736	0.995496	0.0999237	0.920405	0.94603	Nlgn3	-1.55315	3.14405	1.07138	0.340765
ENSMUSG00000057411	295.576	1.57579	0.345276	4.56386	5.0222e-06	2.91773e-05	Fam173a	-0.0763224	3.14294	2.98099	0.948472
ENSMUSG00000023007	18.9879	0.68795	0.731535	0.940419	0.347003	0.459965	Prpf40b	-0.963492	3.14148	1.61099	0.512814
ENSMUSG00000020599	35.9186	-0.0851954	0.511211	-0.166654	0.867642	0.907239	Rgs9	-1.73583	3.13971	0.942657	0.300237
ENSMUSG00000023224	10.4949	-1.69211	1.29895	-1.30268	0.192685	0.292607	Serping1	-3.34191	3.13791	0.309474	0.0986244
ENSMUSG00000031948	172.785	1.51725	0.277894	5.45983	4.76589e-08	3.98494e-07	Kars	-0.131321	3.13524	2.86246	0.912995
ENSMUSG00000031785	298.635	5.01523	0.480282	10.4423	1.58989e-25	5.42182e-24	Adgrg1	3.36675	3.13504	32.3396	10.3155
ENSMUSG00000032548	3.62388	0.89871	1.38447	0.649136	0.516251	0.624087	Slco2a1	-0.749253	3.13391	1.8644	0.594911
ENSMUSG00000032936	244.169	-0.357411	0.339139	-1.05388	0.291938	0.403146	Camkv	-2.00478	3.13263	0.780564	0.249172
ENSMUSG00000057672	266.548	4.40775	0.309996	14.2187	7.01211e-46	5.44762e-44	Pkn1	2.76048	3.13241	21.2259	6.77621
ENSMUSG00000042570	103.385	1.83226	0.336932	5.43805	5.38656e-08	4.47202e-07	Mier2	0.185454	3.13139	3.56093	1.13717
ENSMUSG00000023036	454.79	0.133465	0.214989	0.6208	0.534731	0.639255	Pcdhgc4	-1.51255	3.12969	1.09693	0.35049
ENSMUSG00000028854	74.594	1.12771	0.412636	2.73293	0.00627731	0.0172588	Slc9a1	-0.51783	3.12864	2.18511	0.698422
ENSMUSG00000039620	12.8148	-0.82074	0.897953	-0.914013	0.36071	0.47401	Trmt9b	-2.46491	3.12568	0.566151	0.181129
ENSMUSG00000041654	49.8916	2.1195	0.478933	4.42546	9.62363e-06	5.30521e-05	Slc39a11	0.476671	3.12277	4.34543	1.39153
ENSMUSG00000039377	76.4222	7.36807	0.784041	9.39756	5.58408e-21	1.49559e-19	Hlx	5.72546	3.12231	165.2	52.9097
ENSMUSG00000018559	278.579	1.65073	0.265747	6.21167	5.24253e-10	5.58584e-09	Ctdnep1	0.00823285	3.12206	3.13992	1.00572
ENSMUSG00000029470	121.679	2.78499	0.384825	7.23702	4.5864e-13	6.79331e-12	P2rx4	1.14286	3.12125	6.89231	2.20819
ENSMUSG00000043602	20.9275	0.949891	0.643426	1.4763	0.139863	0.227295	Zfp3	-0.689861	3.11612	1.93173	0.619914
ENSMUSG00000054676	88.7574	2.90647	0.378409	7.68075	1.58161e-14	2.71256e-13	1600014C10Rik	1.26741	3.11463	7.4978	2.40728
ENSMUSG00000027546	431.103	-0.36237	0.292163	-1.2403	0.214864	0.318333	Atp9a	-2.00137	3.11449	0.777885	0.249763
ENSMUSG00000037992	22.0224	-0.352742	0.680421	-0.518418	0.604167	0.70035	Rara	-1.99159	3.11417	0.783094	0.251462
ENSMUSG00000005950	3.48993	-0.0815059	1.62208	-0.0502477	0.959925	NA	P2rx5	-1.72011	3.11364	0.945071	0.303526
ENSMUSG00000024913	79.0494	5.15686	0.495454	10.4084	2.27106e-25	7.67776e-24	Lrp5	3.51845	3.11323	35.6756	11.4594
ENSMUSG00000026668	4.63567	-1.08185	1.40857	-0.768045	0.44246	0.55555	Ucma	-2.71959	3.11177	0.472423	0.151818
ENSMUSG00000032946	51.9271	-0.0627928	0.471399	-0.133205	0.894031	0.926972	Rasgrp2	-1.70032	3.11131	0.957409	0.307719
ENSMUSG00000026514	54.3238	-1.03985	0.501573	-2.07318	0.0381552	0.0786294	Cnih3	-2.67578	3.10788	0.486377	0.156498
ENSMUSG00000024393	542.086	2.18321	0.331301	6.58979	4.40445e-11	5.38775e-10	Prrc2a	0.547605	3.10717	4.54162	1.46166
ENSMUSG00000070003	250.016	1.63759	0.341273	4.79846	1.59892e-06	1.0194e-05	Ssbp4	0.00201677	3.1071	3.11145	1.0014
ENSMUSG00000040327	68.4007	1.37925	0.393193	3.50782	0.000451794	0.00171854	Cul9	-0.255406	3.10513	2.60133	0.837751
ENSMUSG00000002006	85.2422	-0.473469	0.504256	-0.938946	0.347758	0.460602	Pdzd4	-2.10768	3.10418	0.720231	0.23202
ENSMUSG00000039725	48.7847	1.95687	0.456545	4.28627	1.81697e-05	9.46068e-05	Trp53rka	0.322946	3.10357	3.8822	1.25088
ENSMUSG00000097929	40.5668	-0.18765	0.494804	-0.379241	0.704509	0.783522	Tunar	-1.82082	3.10193	0.878035	0.28306
ENSMUSG00000024785	24.8897	1.93673	0.626274	3.09247	0.00198501	0.00636407	Rcl1	0.303827	3.10137	3.82837	1.23441
ENSMUSG00000067870	416.375	1.97071	0.308631	6.38531	1.71053e-10	1.95007e-09	NA	0.337882	3.10119	3.9196	1.2639
ENSMUSG00000014778	19.5874	4.61688	0.915657	5.04214	4.60346e-07	3.26896e-06	Fhod1	2.98423	3.10082	24.5368	7.91301
ENSMUSG00000041164	333.184	0.747009	0.27441	2.72223	0.00648422	0.0177642	Zmiz2	-0.884892	3.09921	1.67831	0.541528
ENSMUSG00000028931	377.959	-0.486066	0.40832	-1.19041	0.233887	0.339067	Kcnab2	-2.11764	3.09851	0.713969	0.230423
ENSMUSG00000043099	5.03608	-0.693558	1.3314	-0.520926	0.602419	0.69887	Hic1	-2.32511	3.09846	0.618327	0.19956
ENSMUSG00000040972	97.1177	-0.483114	0.39777	-1.21456	0.224536	0.328596	Igsf21	-2.11335	3.09564	0.715432	0.231109
ENSMUSG00000032875	32.7629	-0.872389	0.540669	-1.61354	0.106628	0.182309	Arhgef17	-2.5016	3.09343	0.546242	0.176581
ENSMUSG00000024777	137.343	-0.0799315	0.355575	-0.224795	0.822139	0.873043	Ppp2r5b	-1.70756	3.09006	0.946103	0.306177
ENSMUSG00000043999	6.54781	-1.34532	1.15662	-1.16314	0.244772	0.351836	Gpr75	-2.97228	3.08861	0.393567	0.127425
ENSMUSG00000092345	481.314	2.43614	0.275942	8.82846	1.06123e-18	2.48985e-17	NA	0.810467	3.08586	5.41192	1.75378
ENSMUSG00000034486	2.44049	-3.1264	2.14959	-1.45441	0.145831	NA	Gbx2	-4.75056	3.08263	0.114515	0.0371484
ENSMUSG00000031487	36.7209	1.3707	0.676895	2.02498	0.0428698	0.0865438	Brf2	-0.25317	3.082	2.58595	0.839051
ENSMUSG00000032850	72.4146	-0.269886	0.414578	-0.65099	0.515053	0.622959	Rnft2	-1.89327	3.08096	0.829385	0.269197
ENSMUSG00000035226	94.6444	-0.197345	0.452402	-0.436216	0.66268	0.751174	Rims4	-1.82055	3.08058	0.872154	0.283114
ENSMUSG00000053693	78.3551	-0.229687	0.600208	-0.382679	0.701958	0.781872	Mast1	-1.85046	3.0754	0.85282	0.277304
ENSMUSG00000033722	11.9105	-0.0565773	0.93316	-0.0606297	0.951654	0.967824	BC034090	-1.67717	3.07502	0.961543	0.312695
ENSMUSG00000003235	57.033	1.38037	0.458492	3.01068	0.0026066	0.00810015	Eif2b5	-0.240148	3.07486	2.60336	0.846658
ENSMUSG00000023495	193.859	0.027797	0.399862	0.0695164	0.944579	0.962822	Pcbp4	-1.59265	3.07471	1.01945	0.331561
ENSMUSG00000029054	78.4388	-0.545823	0.496935	-1.09838	0.272039	0.382191	Gabrd	-2.16555	3.07317	0.685001	0.222897
ENSMUSG00000009394	105.524	-1.157	0.502525	-2.30237	0.0213145	0.0485893	Syn2	-2.77608	3.0718	0.448445	0.145988
ENSMUSG00000039714	37.7835	-1.43653	0.579305	-2.47976	0.0131472	0.0324627	Cplx3	-3.05466	3.06975	0.369454	0.120353
ENSMUSG00000000305	26.621	-0.819856	0.766866	-1.0691	0.285025	0.395383	Cdh4	-2.43733	3.06837	0.566499	0.184625
ENSMUSG00000008604	59.1023	0.536451	0.401228	1.33702	0.181215	0.278634	Ubqln4	-1.08055	3.06738	1.4504	0.472847
ENSMUSG00000028063	82.4315	0.709759	0.355017	1.99923	0.0455837	0.0911597	Lmna	-0.907037	3.06693	1.63553	0.533279
ENSMUSG00000035596	406.01	0.659742	0.275342	2.39609	0.0165711	0.0395353	Mboat7	-0.956977	3.06677	1.5798	0.515135
ENSMUSG00000028850	24.0974	3.06448	0.645253	4.74927	2.04153e-06	1.27933e-05	Gpatch3	1.4478	3.0667	8.36567	2.72791
ENSMUSG00000022489	111.092	-0.154655	0.501783	-0.308211	0.757921	0.826548	Pde1b	-1.77082	3.06559	0.898347	0.293042
ENSMUSG00000026024	24.6521	0.961661	0.664313	1.4476	0.147728	0.237073	Als2	-0.653437	3.06332	1.94755	0.635764
ENSMUSG00000038077	181.785	-0.0954043	0.366973	-0.259976	0.794882	0.853135	Kcna6	-1.70993	3.0621	0.93601	0.305676
ENSMUSG00000095789	15.3958	-0.701905	0.813696	-0.862613	0.38835	0.502009	Nupr1l	-2.31559	3.06033	0.61476	0.20088
ENSMUSG00000029147	153.999	1.6176	0.311472	5.19342	2.06462e-07	1.57069e-06	Ppm1g	0.00463179	3.05881	3.06865	1.00322
ENSMUSG00000016128	5.78243	-0.352769	1.19484	-0.295245	0.767807	0.833069	Stard13	-1.96419	3.05553	0.78308	0.256283
ENSMUSG00000001020	11.4594	1.92169	0.96512	1.99114	0.0464654	0.0924971	S100a4	0.310952	3.05408	3.78867	1.24053
ENSMUSG00000028538	83.4448	1.01817	0.398456	2.55529	0.0106101	0.0270168	St3gal3	-0.592101	3.05309	2.02535	0.663376
ENSMUSG00000033595	135.514	-0.303841	0.354806	-0.856358	0.3918	0.505522	Lgi3	-1.91401	3.05288	0.810093	0.265354
ENSMUSG00000062380	416.202	-0.316107	0.395237	-0.799789	0.423833	0.536873	Tubb3	-1.92585	3.05198	0.803235	0.263185
ENSMUSG00000003068	150.462	1.65358	0.303607	5.44647	5.13806e-08	4.28391e-07	Stk11	0.0442786	3.05105	3.14614	1.03117
ENSMUSG00000091780	102.961	1.05732	0.347302	3.04437	0.00233169	0.00732932	Sco2	-0.551265	3.04952	2.08106	0.682422
ENSMUSG00000027597	26.2766	-0.423955	0.579982	-0.730978	0.464792	0.576921	Ahcy	-2.03228	3.04898	0.745379	0.244469
ENSMUSG00000020889	88.5956	-0.275004	0.39517	-0.695913	0.486483	0.597102	Nr1d1	-1.88304	3.04836	0.826448	0.271112
ENSMUSG00000021061	99.9166	0.724232	0.564907	1.28204	0.199829	0.300846	Sptb	-0.882908	3.04647	1.65202	0.542273
ENSMUSG00000030688	124.214	-0.231508	0.418251	-0.553514	0.579912	0.679089	Stard10	-1.83838	3.0459	0.851744	0.279636
ENSMUSG00000034220	64	-0.388388	0.426781	-0.910042	0.3628	0.476383	Gpc1	-1.99449	3.04429	0.763983	0.250956
ENSMUSG00000024169	22.9265	1.9418	0.620736	3.12823	0.00175864	0.00570853	Ift140	0.336428	3.04275	3.84186	1.26263
ENSMUSG00000003346	467.314	0.491698	0.255702	1.92294	0.054488	0.105548	Abhd17a	-1.1131	3.04154	1.4061	0.462298
ENSMUSG00000031904	5.85689	-0.797349	1.23167	-0.647374	0.51739	0.624949	Slc7a6	-2.40201	3.04125	0.575406	0.189201
ENSMUSG00000043257	28.1377	2.46516	0.618729	3.98424	6.76978e-05	0.000309013	Pigv	0.861068	3.04005	5.52189	1.81638
ENSMUSG00000020886	276.19	-0.597718	0.352722	-1.69459	0.0901532	0.158345	Dlg4	-2.20149	3.03936	0.660798	0.217414
ENSMUSG00000018661	42.7784	1.05356	0.467195	2.25507	0.0241288	0.0539358	Cog1	-0.54784	3.03437	2.07564	0.684043
ENSMUSG00000078235	56.5097	-0.676136	0.475518	-1.42189	0.155058	0.246474	Fam43b	-2.27645	3.03209	0.625839	0.206405
ENSMUSG00000063457	3527.74	1.97261	0.197437	9.99109	1.6674e-23	5.16103e-22	Rps15	0.373092	3.03042	3.92477	1.29513
ENSMUSG00000028753	2.8323	-1.15644	1.61243	-0.717205	0.473247	NA	Vwa5b1	-2.75575	3.02998	0.448617	0.148059
ENSMUSG00000018920	179.836	6.04525	0.438931	13.7727	3.72178e-43	2.63014e-41	Cxcl16	4.44655	3.02871	66.0394	21.8045
ENSMUSG00000033365	95.9291	1.41836	0.388017	3.6554	0.000256786	0.00103839	Ipo13	-0.180083	3.02815	2.67281	0.882652
ENSMUSG00000020538	59.9562	1.1502	0.423522	2.7158	0.00661149	0.0180707	Srebf1	-0.447722	3.02708	2.21945	0.733199
ENSMUSG00000026820	68.1574	0.835798	0.490597	1.70364	0.088449	0.155871	Ptges2	-0.761258	3.02525	1.78484	0.589981
ENSMUSG00000017664	437.82	2.69765	0.405342	6.65524	2.82836e-11	3.52224e-10	Slc35c2	1.10068	3.02508	6.48745	2.14456
ENSMUSG00000034892	7124.93	2.38981	0.326733	7.31425	2.58815e-13	3.92776e-12	Rps29	0.793232	3.02425	5.24088	1.73295
ENSMUSG00000024251	14.6909	2.51545	1.02048	2.46497	0.0137024	0.0336282	Thada	0.919293	3.02337	5.71776	1.89119
ENSMUSG00000037579	124.841	-0.404978	0.449745	-0.900462	0.367874	0.481537	Kcnh3	-1.99724	3.01523	0.755248	0.250478
ENSMUSG00000006576	105.228	-0.12967	0.430677	-0.301085	0.76335	0.830152	Slc4a3	-1.72183	3.015	0.91404	0.303165
ENSMUSG00000034993	18.6267	0.752495	0.69452	1.08347	0.278598	0.388612	Vat1	-0.838932	3.01347	1.6847	0.559057
ENSMUSG00000090071	462.602	-1.01069	0.319859	-3.15981	0.00157872	0.00518477	Cdk5r2	-2.60069	3.01049	0.496308	0.16486
ENSMUSG00000035885	1481.51	0.446177	0.255497	1.74631	0.080757	0.144621	Cox8a	-1.14199	3.00666	1.36243	0.453135
ENSMUSG00000038759	3.51056	0.486655	1.37665	0.353508	0.723708	NA	Nup205	-1.10036	3.00428	1.40119	0.466399
ENSMUSG00000002900	7.10965	-0.951316	1.13333	-0.839402	0.401244	0.514369	Lamb1	-2.53643	3.00033	0.517161	0.172368
ENSMUSG00000030350	40.7586	-0.493198	0.503714	-0.979123	0.327519	0.44051	Prmt8	-2.0772	2.99799	0.710449	0.236975
ENSMUSG00000037032	653.218	-0.311235	0.265388	-1.17276	0.240894	0.347255	Apbb1	-1.89435	2.99615	0.805951	0.268996
ENSMUSG00000074359	6.92465	0.873519	1.24358	0.702424	0.482415	0.593784	Psg23	-0.709571	2.99611	1.83213	0.611502
ENSMUSG00000025533	63.6027	2.78177	0.467218	5.95391	2.61808e-09	2.55089e-08	Asl	1.19916	2.99513	6.87697	2.29605
ENSMUSG00000006732	31.0016	1.39345	0.619459	2.24945	0.0244836	0.0546032	Mettl1	-0.188843	2.99445	2.62705	0.877309
ENSMUSG00000007944	223.973	-0.426828	0.290397	-1.46981	0.141613	0.229425	Ttc9b	-2.0085	2.99318	0.743895	0.248531
ENSMUSG00000038587	2.75933	-0.26803	3.96025	-0.0676802	0.94604	NA	Akap12	-1.84923	2.99218	0.830453	0.277541
ENSMUSG00000025854	61.2305	0.00890269	0.442541	0.0201172	0.98395	0.989602	Fam20c	-1.57139	2.99031	1.00619	0.336484
ENSMUSG00000017830	15.4662	3.90198	0.964831	4.04421	5.25002e-05	0.000247341	Dhx58	2.32177	2.99013	14.949	4.99945
ENSMUSG00000020701	24.0079	-0.383356	0.637029	-0.601786	0.547316	0.650723	Tmem132e	-1.96242	2.98775	0.766652	0.256598
ENSMUSG00000035953	300.716	1.91859	0.308632	6.21642	5.08623e-10	5.43411e-09	Pip4p1	0.341272	2.98414	3.78053	1.26687
ENSMUSG00000020475	9.77542	0.294544	0.942108	0.312644	0.754551	0.824022	Pgam2	-1.28267	2.98392	1.2265	0.411035
ENSMUSG00000025499	516.543	0.419723	0.330753	1.26899	0.204444	0.306541	Hras	-1.15736	2.98367	1.33767	0.448331
ENSMUSG00000029095	121.997	-0.706703	0.376888	-1.8751	0.0607788	0.115148	Ablim2	-2.28322	2.98248	0.612719	0.205439
ENSMUSG00000036686	53.527	2.16037	0.543438	3.97538	7.02676e-05	0.000319623	Cc2d1a	0.584417	2.98133	4.4703	1.49943
ENSMUSG00000050989	32.5622	1.55729	0.523901	2.9725	0.00295389	0.00902633	Selenon	-0.0167948	2.97747	2.94301	0.988426
ENSMUSG00000090812	5.29951	0.145758	1.94819	0.0748171	0.94036	0.960084	Samd15	-1.42831	2.97743	1.10631	0.371566
ENSMUSG00000026674	5.56431	0.705661	1.69189	0.417085	0.676616	0.762184	Ddr2	-0.868285	2.97718	1.63089	0.547798
ENSMUSG00000022856	45.3513	-0.971057	0.467518	-2.07705	0.0377974	0.0780137	Tmem41a	-2.54456	2.97627	0.510132	0.1714
ENSMUSG00000026880	52.896	2.21837	0.437446	5.07119	3.95336e-07	2.85396e-06	Stom	0.64521	2.97556	4.65368	1.56397
ENSMUSG00000080921	27.2883	1.68905	0.666606	2.5338	0.0112833	0.0284196	NA	0.116304	2.9747	3.22444	1.08395
ENSMUSG00000016503	98.1621	1.54336	0.394351	3.91366	9.09091e-05	0.000405034	Gtf3a	-0.0289609	2.97382	2.91472	0.980126
ENSMUSG00000023452	13.1719	2.36613	1.30092	1.81881	0.0689399	0.12744	Pisd	0.793989	2.97346	5.15557	1.73386
ENSMUSG00000068335	120.456	6.80433	0.615244	11.0596	1.97069e-28	7.81021e-27	Dok1	5.23342	2.97093	111.765	37.6197
ENSMUSG00000023009	40.5113	3.32717	0.616627	5.39577	6.82319e-08	5.58179e-07	Nckap5l	1.75715	2.96908	10.0364	3.38031
ENSMUSG00000041571	1152.29	-0.403694	0.360613	-1.11947	0.262941	0.371634	Selenow	-1.97284	2.9673	0.75592	0.25475
ENSMUSG00000002602	92.15	1.15964	0.369981	3.13432	0.00172254	0.00561033	Axl	-0.409076	2.9664	2.23401	0.753106
ENSMUSG00000036057	45.6263	1.78558	0.746349	2.39242	0.0167376	0.0399042	Ptpn23	0.216904	2.96633	3.44757	1.16224
ENSMUSG00000015085	15.2839	-1.19956	0.801131	-1.49733	0.134308	0.219959	Entpd2	-2.7658	2.96132	0.435409	0.147032
ENSMUSG00000056014	6.47796	1.27733	1.12699	1.13339	0.257049	0.365154	A430033K04Rik	-0.287516	2.95845	2.4239	0.819312
ENSMUSG00000071646	68.6827	3.14153	0.454474	6.91245	4.76343e-12	6.47506e-11	Mta2	1.57729	2.95722	8.82462	2.98409
ENSMUSG00000017724	13.5096	-0.523168	0.879793	-0.594649	0.552078	0.654718	Etv4	-2.08655	2.95546	0.695842	0.235443
ENSMUSG00000051107	46.8264	0.310702	0.502012	0.618912	0.535974	0.640211	NA	-1.25233	2.95473	1.24031	0.419771
ENSMUSG00000011096	150.433	1.06973	0.29071	3.67972	0.000233487	0.000951715	Akt1s1	-0.493066	2.95426	2.09904	0.710514
ENSMUSG00000003970	5446.4	2.40865	0.267728	8.99663	2.32745e-19	5.61796e-18	Rpl8	0.845896	2.95418	5.30978	1.79738
ENSMUSG00000027498	40.4001	1.68976	0.490265	3.44662	0.000567654	0.00210533	Cstf1	0.127408	2.95334	3.22602	1.09233
ENSMUSG00000074575	25.9506	-0.548555	0.666843	-0.822615	0.410727	0.52412	Kcng1	-2.11027	2.95205	0.683704	0.231603
ENSMUSG00000041609	11.1248	0.657175	1.59223	0.412739	0.679798	0.764446	Bicdl1	-0.90395	2.95084	1.57699	0.534422
ENSMUSG00000034926	33.2934	-0.764661	0.556252	-1.37467	0.169235	0.263821	Dhcr24	-2.32575	2.95077	0.588592	0.19947
ENSMUSG00000037295	42.2439	3.15824	0.529214	5.96778	2.40497e-09	2.36089e-08	Ldlrap1	1.5978	2.94944	8.92738	3.02681
ENSMUSG00000047281	8.58758	1.32234	0.945705	1.39826	0.162035	0.255077	Sfn	-0.237673	2.94857	2.50072	0.848112
ENSMUSG00000004263	135.083	0.777035	0.326493	2.37995	0.0173152	0.0410186	Atn1	-0.782648	2.94789	1.71361	0.581299
ENSMUSG00000067629	4.16429	-0.454132	1.65882	-0.273768	0.784263	0.845373	Syngap1	-2.01302	2.94626	0.729949	0.247755
ENSMUSG00000025034	178.031	2.34328	0.345674	6.77886	1.21128e-11	1.56493e-10	Trim8	0.784665	2.9457	5.07454	1.72269
ENSMUSG00000030218	63.2227	-0.748501	0.420453	-1.78023	0.0750388	0.136478	Mgp	-2.30677	2.94499	0.595222	0.202113
ENSMUSG00000025213	19.5085	-1.31917	0.690387	-1.91076	0.0560349	0.108063	Kazald1	-2.87714	2.9444	0.400766	0.136111
ENSMUSG00000052934	168.21	-0.195971	0.331926	-0.590406	0.554919	0.657285	Fbxo31	-1.75385	2.9442	0.872985	0.29651
ENSMUSG00000032177	162.44	-0.212851	0.434211	-0.490202	0.623991	0.716667	Pde4a	-1.77055	2.94384	0.86283	0.293097
ENSMUSG00000096780	4.29376	-0.0773883	1.73448	-0.0446175	0.964412	0.976145	NA	-1.63347	2.94053	0.947772	0.322313
ENSMUSG00000040189	4.14463	0.126311	1.46314	0.0863285	0.931205	0.95387	Ccdc114	-1.42956	2.94011	1.0915	0.371244
ENSMUSG00000041607	2389.15	-0.93365	0.266526	-3.50304	0.000459982	0.00174743	Mbp	-2.48854	2.93811	0.523532	0.178186
ENSMUSG00000051550	39.9764	0.971357	0.504445	1.9256	0.0541548	0.105094	Zfp579	-0.582288	2.93558	1.96068	0.667903
ENSMUSG00000048440	18.612	2.4352	0.7406	3.28814	0.00100852	0.00351692	Cyp4f16	0.881849	2.93497	5.40838	1.84274
ENSMUSG00000024797	90.0081	1.53292	0.45517	3.36781	0.000757678	0.00272076	Vps51	-0.0203172	2.93476	2.89372	0.986016
ENSMUSG00000031378	85.0782	4.42811	0.446066	9.92704	3.17538e-23	9.67541e-22	Abcd1	2.87621	2.93203	21.5275	7.34218
ENSMUSG00000028047	8.54913	-0.225361	1.04411	-0.21584	0.829112	0.878223	Thbs3	-1.77684	2.93117	0.855381	0.291822
ENSMUSG00000034247	62.8925	1.95985	0.42178	4.64662	3.37413e-06	2.02776e-05	Plekhm1	0.408743	2.93042	3.89022	1.32753
ENSMUSG00000025171	153.16	3.72538	0.361231	10.313	6.15448e-25	2.0055e-23	Ubtd1	2.17432	2.93033	13.2267	4.51372
ENSMUSG00000031508	18.5245	0.837192	1.04465	0.801408	0.422895	0.535975	Ankrd10	-0.711699	2.92592	1.78657	0.610601
ENSMUSG00000026080	106.01	-0.244247	0.373972	-0.653115	0.513682	0.621943	Chst10	-1.79311	2.92586	0.844256	0.28855
ENSMUSG00000041423	18.8294	-0.847293	0.777432	-1.08986	0.275774	0.38605	Paqr6	-2.39467	2.92285	0.555827	0.190166
ENSMUSG00000070699	33.19	1.00549	0.519984	1.93369	0.053151	0.103534	Sars2	-0.541168	2.92139	2.00762	0.687214
ENSMUSG00000037552	6.53521	2.65578	1.26624	2.09737	0.0359612	0.0748378	Plekhg2	1.10919	2.92126	6.30187	2.15724
ENSMUSG00000046056	47.3938	0.231924	0.472053	0.49131	0.623207	0.716118	Sbsn	-1.31438	2.92068	1.1744	0.402099
ENSMUSG00000039263	80.1294	3.49658	0.543153	6.43755	1.21417e-10	1.41164e-09	Npepl1	1.95043	2.92035	11.2869	3.86491
ENSMUSG00000023909	102.025	-0.0261015	0.347456	-0.0751216	0.940118	0.95992	Paqr4	-1.57224	2.92034	0.982071	0.336286
ENSMUSG00000019088	6.00505	1.98703	1.15827	1.71552	0.0862504	0.152817	Dnase1l1	0.44109	2.91994	3.9642	1.35763
ENSMUSG00000031778	387.923	-0.518831	0.260509	-1.9916	0.0464144	0.092427	Cx3cl1	-2.06401	2.9184	0.697937	0.239151
ENSMUSG00000054452	1385.71	1.01036	0.488267	2.06927	0.0385206	0.0792782	Tle5	-0.533872	2.91648	2.01441	0.690698
ENSMUSG00000067071	76.96	2.00245	0.459914	4.35397	1.33695e-05	7.19106e-05	Hes6	0.458739	2.91544	4.0068	1.37434
ENSMUSG00000033159	182.435	2.80346	0.281619	9.95479	2.40325e-23	7.36098e-22	Cnppd1	1.26015	2.91462	6.98111	2.39521
ENSMUSG00000024413	42.9299	2.77496	0.651089	4.26202	2.02588e-05	0.000104602	Npc1	1.23211	2.91368	6.84455	2.34911
ENSMUSG00000070000	45.976	-0.128226	0.591242	-0.216876	0.828305	0.877922	Fcho1	-1.6709	2.91335	0.914956	0.314057
ENSMUSG00000029345	70.7148	1.77476	0.443766	3.9993	6.35296e-05	0.00029249	Tfip11	0.232261	2.91298	3.4218	1.17467
ENSMUSG00000071719	17.1734	-0.352823	0.881356	-0.400318	0.688922	0.771969	Tmem28	-1.89484	2.912	0.78305	0.268904
ENSMUSG00000039463	53.0438	1.27394	0.464813	2.74076	0.00612981	0.0168879	Slc9a8	-0.268071	2.912	2.41821	0.830429
ENSMUSG00000041740	420.16	1.29392	0.269375	4.80341	1.55988e-06	9.9722e-06	Rnf10	-0.246897	2.90959	2.45193	0.842707
ENSMUSG00000022475	13.5117	0.691619	0.88762	0.779183	0.435872	0.548708	Hdac7	-0.848406	2.90799	1.61509	0.555398
ENSMUSG00000020427	12.0383	-0.821422	0.833422	-0.985602	0.324328	0.437321	Igfbp3	-2.36132	2.90774	0.565884	0.194613
ENSMUSG00000027243	6.74074	0.75017	1.03618	0.723976	0.46908	0.581075	Harbi1	-0.789379	2.90704	1.68199	0.578593
ENSMUSG00000030431	10.5912	0.160599	0.981714	0.163591	0.870054	0.909436	Tmem238	-1.3784	2.90594	1.11775	0.384644
ENSMUSG00000032245	56.5168	2.42336	0.485179	4.99477	5.89051e-07	4.07679e-06	Cln6	0.885771	2.90309	5.36418	1.84775
ENSMUSG00000034994	2250.77	2.07894	0.230621	9.01454	1.97693e-19	4.78172e-18	Eef2	0.541855	2.90208	4.22497	1.45584
ENSMUSG00000026885	38.1749	0.0044873	0.531791	0.00843809	0.993267	0.995984	Ttll11	-1.53244	2.90176	1.00312	0.345691
ENSMUSG00000046240	101.374	-0.540412	0.352196	-1.53441	0.12493	0.207556	Hepacam	-2.07693	2.90094	0.687574	0.237018
ENSMUSG00000025812	11.0591	-0.304841	1.23388	-0.24706	0.804862	0.859834	Pard3	-1.84116	2.90053	0.809531	0.279098
ENSMUSG00000022391	340.468	0.521047	0.251736	2.06981	0.0384701	0.0791881	Rangap1	-1.01506	2.90011	1.435	0.494808
ENSMUSG00000050188	44.8562	2.70515	0.512163	5.28181	1.27914e-07	9.98372e-07	Lsm10	1.16956	2.89908	6.52126	2.24942
ENSMUSG00000030122	1602.87	1.85913	0.26154	7.1084	1.17398e-12	1.68156e-11	Ptms	0.323837	2.89847	3.62788	1.25165
ENSMUSG00000028064	33.8291	0.282696	0.634254	0.445714	0.655804	0.745036	Sema4a	-1.25256	2.8984	1.21647	0.419703
ENSMUSG00000026489	29.5022	0.400883	0.555196	0.722057	0.470259	0.582085	Coq8a	-1.13426	2.89817	1.32032	0.45557
ENSMUSG00000025408	94.6046	0.631475	0.338696	1.86443	0.0622616	0.117445	Ddit3	-0.902458	2.89574	1.54915	0.534974
ENSMUSG00000053730	27.9241	1.36258	0.597181	2.28169	0.0225078	0.0509138	Tmem39b	-0.17119	2.89541	2.57145	0.88811
ENSMUSG00000014633	75.3587	0.943354	0.398474	2.36742	0.0179127	0.0421533	Cmc2	-0.589751	2.89408	1.92299	0.664457
ENSMUSG00000030871	9.86146	2.6923	0.970515	2.77409	0.00553557	0.0155205	Ears2	1.1594	2.89368	6.46343	2.23364
ENSMUSG00000054723	44.3696	1.34682	0.478246	2.81616	0.00486008	0.0138584	Vmac	-0.185949	2.8934	2.54351	0.879071
ENSMUSG00000037012	396.386	0.227938	0.291156	0.782874	0.433701	0.54654	Hk1	-1.30424	2.89223	1.17116	0.404933
ENSMUSG00000060212	37.4852	-0.815924	0.566208	-1.44103	0.149576	0.23948	Pcnx2	-2.34756	2.89113	0.568045	0.196478
ENSMUSG00000035984	4.20267	-0.829249	1.42923	-0.580205	0.561776	0.663235	Nme5	-2.36073	2.89082	0.562822	0.194693
ENSMUSG00000025491	7.69119	0.393317	0.982152	0.400465	0.688814	0.771969	Ifitm1	-1.13723	2.88896	1.31341	0.454631
ENSMUSG00000039747	103.511	1.59653	0.329863	4.83998	1.29853e-06	8.4347e-06	Orai2	0.0660024	2.88892	3.02415	1.04681
ENSMUSG00000044317	6.12326	0.252875	1.08691	0.232654	0.81603	0.868049	Gpr4	-1.27734	2.8883	1.19158	0.412554
ENSMUSG00000025742	26.1355	3.32429	0.7849	4.2353	2.28247e-05	0.000116315	Prps2	1.79482	2.88679	10.0164	3.46972
ENSMUSG00000052921	22.6067	-0.692877	0.656947	-1.05469	0.291566	0.402775	Arhgef15	-2.22216	2.88642	0.618619	0.21432
ENSMUSG00000047215	4288.34	2.47403	0.199859	12.3789	3.39992e-35	1.86376e-33	Rpl9	0.946355	2.8832	5.55593	1.927
ENSMUSG00000031930	88.7573	2.38162	0.371218	6.41569	1.40183e-10	1.61699e-09	Wwp2	0.85408	2.88294	5.21122	1.80761
ENSMUSG00000010797	4.5085	-0.68963	1.35669	-0.508318	0.61123	0.706298	Wnt2	-2.21695	2.8825	0.620013	0.215096
ENSMUSG00000032010	471.46	2.97103	0.250834	11.8446	2.29389e-32	1.09388e-30	Usp2	1.44437	2.88118	7.84098	2.72145
ENSMUSG00000020196	115.764	1.93238	0.353365	5.4685	4.5385e-08	3.80981e-07	Cabin1	0.406067	2.88048	3.81683	1.32507
ENSMUSG00000047423	161.362	1.54905	0.422607	3.66547	0.000246889	0.00100286	AI837181	0.0235858	2.8788	2.92625	1.01648
ENSMUSG00000021079	103.01	-0.467901	0.332874	-1.40564	0.15983	0.252553	Timm9	-1.99336	2.87878	0.723016	0.251154
ENSMUSG00000042677	10.5747	1.726	0.94701	1.82258	0.0683667	0.12654	Zc3h12a	0.200876	2.87812	3.3081	1.1494
ENSMUSG00000022096	9.63384	0.425118	0.896682	0.474101	0.635428	0.727097	Hr	-1.09986	2.87783	1.34268	0.466561
ENSMUSG00000020929	104.167	1.50159	0.33769	4.44664	8.72219e-06	4.8447e-05	Eftud2	-0.0233666	2.87777	2.83154	0.983934
ENSMUSG00000071658	789.242	-0.689888	0.225121	-3.06451	0.00218024	0.00689783	Gng3	-2.21344	2.87498	0.619902	0.21562
ENSMUSG00000064246	28.8976	-0.26088	0.576285	-0.452692	0.650771	0.740583	Chil1	-1.78417	2.87446	0.834579	0.290342
ENSMUSG00000003865	18.3233	1.10012	0.697856	1.57643	0.114927	0.19368	Gys1	-0.423017	2.87415	2.14373	0.745863
ENSMUSG00000027612	51.7764	-0.21546	0.50608	-0.425742	0.670296	0.757319	Mmp24	-1.73818	2.87333	0.861272	0.299747
ENSMUSG00000022949	6.98123	-1.15334	1.10396	-1.04473	0.296149	0.407757	Clic6	-2.67579	2.87278	0.449583	0.156498
ENSMUSG00000020744	85.5565	0.237096	0.353999	0.669764	0.503008	0.611861	Slc25a19	-1.28489	2.87187	1.17862	0.410401
ENSMUSG00000006235	16.1478	0.717119	0.761801	0.941346	0.346528	0.459543	Epor	-0.803841	2.86982	1.6439	0.572822
ENSMUSG00000039195	353.577	-0.743387	0.322642	-2.30406	0.0212192	0.0484286	1110008P14Rik	-2.26379	2.86872	0.597335	0.208224
ENSMUSG00000034685	113.448	-0.519471	0.386441	-1.34424	0.178869	0.275514	Fam171a2	-2.03986	2.86868	0.697628	0.243188
ENSMUSG00000031819	149.153	1.61042	0.350222	4.59829	4.2598e-06	2.51493e-05	Emc8	0.0901424	2.86847	3.05341	1.06448
ENSMUSG00000021609	2.76278	-2.42816	2.10406	-1.15404	0.248484	NA	Slc6a3	-3.94813	2.86785	0.185802	0.0647879
ENSMUSG00000021647	85.832	-1.77618	0.409728	-4.33502	1.45747e-05	7.77161e-05	Cartpt	-3.29481	2.86519	0.291956	0.101898
ENSMUSG00000025579	361.298	0.244576	0.269216	0.908477	0.363626	0.477255	Gaa	-1.27267	2.86244	1.18474	0.413894
ENSMUSG00000000740	8645.69	1.94113	0.180039	10.7817	4.20017e-27	1.53976e-25	Rpl13	0.425858	2.85853	3.84006	1.34337
ENSMUSG00000004415	2.77586	-0.220874	1.6041	-0.137694	0.890482	NA	Col26a1	-1.73604	2.85832	0.858045	0.300192
ENSMUSG00000035697	302.19	7.33091	0.49735	14.7399	3.57075e-49	3.0354e-47	Arhgap45	5.81642	2.85698	161	56.3531
ENSMUSG00000024008	116.973	-0.436763	0.375235	-1.16397	0.244435	0.351535	Cpne5	-1.951	2.85648	0.73879	0.258637
ENSMUSG00000005125	88.9863	-0.685778	0.364475	-1.88155	0.0598973	0.113827	Ndrg1	-2.19991	2.85627	0.621671	0.217652
ENSMUSG00000074872	11.8501	-1.71172	0.960645	-1.78184	0.0747752	0.136083	Ctxn2	-3.22422	2.85305	0.305297	0.107007
ENSMUSG00000003363	763.34	0.936974	0.258608	3.62315	0.000291038	0.00116089	Pld3	-0.575129	2.85226	1.91451	0.671226
ENSMUSG00000005580	31.6561	0.451141	0.598143	0.754235	0.450708	0.563193	Adcy9	-1.05941	2.84919	1.36712	0.479828
ENSMUSG00000037740	305.69	0.831561	0.340868	2.43954	0.0147059	0.0356731	Mrps26	-0.676697	2.84466	1.77961	0.625596
ENSMUSG00000028104	101.957	1.7048	0.33658	5.06507	4.08251e-07	2.93816e-06	Polr3gl	0.196679	2.8444	3.25984	1.14606
ENSMUSG00000037349	69.6195	2.57408	0.424188	6.06825	1.29313e-09	1.30661e-08	Nudt22	1.06663	2.84307	5.9549	2.09453
ENSMUSG00000028078	58.6638	0.0739826	0.478001	0.154775	0.876999	0.914495	Dclk2	-1.43301	2.84217	1.05262	0.370357
ENSMUSG00000003099	389.48	1.31845	0.243725	5.40959	6.31691e-08	5.1857e-07	Ppp5c	-0.183348	2.83196	2.49399	0.880657
ENSMUSG00000034889	69.6547	2.35436	0.485044	4.85392	1.21046e-06	7.92406e-06	Cactin	0.852997	2.83111	5.11369	1.80625
ENSMUSG00000025477	109.831	-0.00796509	0.342632	-0.0232468	0.981453	0.988147	Inpp5a	-1.50872	2.8299	0.994494	0.351424
ENSMUSG00000076441	64.4873	-0.588956	0.523918	-1.12414	0.260954	0.369315	Ass1	-2.08958	2.82966	0.664824	0.234948
ENSMUSG00000035585	185.252	1.39628	0.383591	3.64002	0.000272614	0.00109735	Tsen34	-0.103929	2.82883	2.63222	0.930495
ENSMUSG00000032594	221.623	1.14874	0.305942	3.75476	0.000173508	0.000727717	Ip6k1	-0.35143	2.82876	2.2172	0.783807
ENSMUSG00000034958	169.424	-0.701433	0.298931	-2.34647	0.018952	0.0441725	Atcay	-2.20048	2.82657	0.614961	0.217565
ENSMUSG00000051062	136.083	-0.606266	0.310101	-1.95506	0.0505764	0.0993322	Fbll1	-2.10488	2.82571	0.656895	0.232471
ENSMUSG00000026247	23.3582	-1.57194	0.651944	-2.41116	0.0159018	0.0381248	Ecel1	-3.06971	2.82405	0.336355	0.119104
ENSMUSG00000045039	52.064	0.700193	0.484066	1.44648	0.148042	0.237446	Megf8	-0.797209	2.82334	1.62472	0.575461
ENSMUSG00000008690	182.862	1.6141	0.295429	5.46357	4.66664e-08	3.91031e-07	Ncaph2	0.11698	2.82278	3.0612	1.08446
ENSMUSG00000025209	18.0426	1.41215	0.678462	2.0814	0.0373969	0.0774137	Twnk	-0.0831218	2.81918	2.66134	0.944013
ENSMUSG00000024130	107.706	1.0734	0.322878	3.32446	0.000885886	0.00313873	Abca3	-0.421793	2.81901	2.10438	0.746497
ENSMUSG00000078786	26.9371	1.69151	0.579837	2.91722	0.00353171	0.0105367	BC024978	0.196428	2.81881	3.22995	1.14586
ENSMUSG00000050212	48.8562	4.07907	0.550205	7.41373	1.22799e-13	1.93104e-12	Eva1b	2.58424	2.8183	16.9014	5.997
ENSMUSG00000021219	35.406	-1.30823	0.574808	-2.27595	0.0228491	0.051527	Rgs6	-2.80278	2.81775	0.403815	0.143311
ENSMUSG00000051786	26.3061	1.41964	0.615361	2.30701	0.0210543	0.0481308	Tubgcp6	-0.0748132	2.81758	2.67519	0.949465
ENSMUSG00000041528	49.1803	0.857467	0.481443	1.78103	0.0749068	0.136301	Rnf123	-0.63683	2.81727	1.81185	0.643125
ENSMUSG00000042185	13.4309	1.66669	0.851797	1.95667	0.050386	0.0990081	Nfrkb	0.172572	2.81691	3.17485	1.12707
ENSMUSG00000042203	42.6126	0.385063	0.612136	0.629047	0.529318	0.635431	Tbc1d22b	-1.10895	2.81671	1.30592	0.463632
ENSMUSG00000021259	330.109	-0.539759	0.38328	-1.40826	0.159054	0.251701	Cyp46a1	-2.03322	2.81565	0.687886	0.244308
ENSMUSG00000000085	76.524	1.43276	0.391624	3.65851	0.000253687	0.00102763	Scmh1	-0.060554	2.81535	2.69962	0.958896
ENSMUSG00000040712	466.477	0.283764	0.320029	0.886685	0.375249	0.488953	Camta2	-1.20852	2.81335	1.21737	0.432711
ENSMUSG00000081058	7.42282	-0.0594066	0.999223	-0.0594528	0.952591	0.968526	Hist2h3c2	-1.55134	2.81265	0.959659	0.341194
ENSMUSG00000032218	4.91074	3.72504	1.60355	2.32299	0.0201795	0.0465813	Ccnb2	2.23361	2.81168	13.2236	4.7031
ENSMUSG00000029819	179.617	-1.31373	0.412833	-3.18223	0.00146144	0.00484659	Npy	-2.80483	2.81102	0.402279	0.143108
ENSMUSG00000020827	199.478	0.23995	0.438987	0.546599	0.584654	0.682785	Mink1	-1.25099	2.81072	1.18095	0.42016
ENSMUSG00000028773	120.366	-0.587073	0.420198	-1.39713	0.162374	0.255412	Fabp3	-2.07699	2.80872	0.665692	0.237009
ENSMUSG00000041708	98.9523	-0.683589	0.391177	-1.74752	0.0805473	0.144516	Mpped1	-2.17288	2.80751	0.622614	0.221767
ENSMUSG00000093989	506.283	1.04744	0.296374	3.5342	0.000409017	0.0015742	Rnasek	-0.43964	2.80322	2.06686	0.737318
ENSMUSG00000031153	51.1666	1.49463	0.469798	3.18144	0.00146543	0.00485484	Gripap1	0.00779353	2.80275	2.81793	1.00542
ENSMUSG00000020614	14.8096	-1.2131	0.854609	-1.41948	0.155761	0.24729	Fam20a	-2.69965	2.80219	0.431342	0.153931
ENSMUSG00000020219	193.538	1.37954	0.366251	3.76665	0.000165451	0.000698419	Timm13	-0.106828	2.80182	2.60185	0.928628
ENSMUSG00000050335	38.7703	3.57643	0.549024	6.51416	7.30955e-11	8.70542e-10	Lgals3	2.09011	2.80175	11.9293	4.2578
ENSMUSG00000050174	22.295	1.65929	0.638389	2.59919	0.00934449	0.0242576	Nudt6	0.173092	2.8015	3.15862	1.12747
ENSMUSG00000051435	35.98	2.37935	0.630426	3.7742	0.000160525	0.000680316	Fhad1	0.893247	2.80132	5.20303	1.85735
ENSMUSG00000022899	18.3618	2.84685	0.847899	3.35754	0.000786406	0.00281432	Slc15a2	1.36198	2.79892	7.19428	2.57038
ENSMUSG00000060992	160.493	2.0409	0.288755	7.06793	1.5726e-12	2.22803e-11	Copz1	0.556559	2.79789	4.11502	1.47076
ENSMUSG00000019808	5.61553	1.18566	1.12389	1.05496	0.291443	0.402652	Adat2	-0.298021	2.79662	2.27468	0.813367
ENSMUSG00000027239	61.0229	-0.226554	0.42088	-0.538286	0.59038	0.687897	Mdk	-1.70972	2.79561	0.854674	0.30572
ENSMUSG00000060002	78.7992	0.0435333	0.407874	0.106732	0.915001	0.942147	Chpt1	-1.43909	2.79457	1.03063	0.3688
ENSMUSG00000028960	84.3154	0.889059	0.56992	1.55997	0.118766	0.198837	Ube4b	-0.592665	2.79282	1.85197	0.663117
ENSMUSG00000032714	8.54481	-0.926376	1.24812	-0.742215	0.457957	0.570489	Syde1	-2.40736	2.7914	0.526179	0.1885
ENSMUSG00000040688	26.8061	1.97603	0.579317	3.41097	0.000647319	0.00237081	Tbl3	0.495618	2.79029	3.9341	1.40993
ENSMUSG00000018566	4.37824	-0.0757873	1.28516	-0.058971	0.952975	0.968832	Slc2a4	-1.55566	2.78924	0.948824	0.340173
ENSMUSG00000070327	23.2426	3.71626	0.767708	4.84073	1.29364e-06	8.4076e-06	Rnf213	2.23655	2.78893	13.1434	4.7127
ENSMUSG00000041828	7.07728	-2.67499	1.32903	-2.01274	0.0441419	0.088639	Abca8a	-4.15443	2.7884	0.156584	0.0561554
ENSMUSG00000020908	2.56072	-1.26593	1.82051	-0.695374	0.486821	NA	Myh3	-2.74504	2.78776	0.41583	0.149163
ENSMUSG00000022452	663.047	1.06734	0.245427	4.34893	1.36804e-05	7.34485e-05	Smdt1	-0.411663	2.78757	2.09557	0.751757
ENSMUSG00000051703	122.094	-0.204023	0.387927	-0.52593	0.598937	0.695656	Tmem198	-1.68211	2.78579	0.868127	0.311627
ENSMUSG00000026204	387.84	-0.928869	0.384971	-2.41283	0.0158294	0.0379666	Ptprn	-2.40626	2.78445	0.52527	0.188644
ENSMUSG00000056222	54.148	-0.437472	0.525623	-0.832291	0.405244	0.518421	Spock1	-1.91477	2.78426	0.738428	0.265215
ENSMUSG00000022185	111.877	2.0921	0.342893	6.10132	1.05195e-09	1.07401e-08	Acin1	0.615109	2.78368	4.26369	1.53167
ENSMUSG00000028430	54.2813	0.813994	0.467359	1.74169	0.0815628	0.1459	Nol6	-0.662764	2.78323	1.75807	0.631667
ENSMUSG00000051242	9.64405	-3.32882	1.25864	-2.64478	0.00817447	0.0216613	Pcdhb9	-4.80445	2.78105	0.0995237	0.0357864
ENSMUSG00000038214	6.59891	1.9686	1.13553	1.73364	0.082982	0.14801	Bend3	0.493313	2.78038	3.91387	1.40767
ENSMUSG00000041046	39.3918	-1.09733	0.636648	-1.72361	0.0847787	0.150665	Ramp3	-2.57171	2.77865	0.46738	0.168204
ENSMUSG00000038880	316.108	1.01884	0.297651	3.42294	0.000619483	0.00228168	Mrps34	-0.45491	2.77743	2.02629	0.729556
ENSMUSG00000034947	83.7733	5.83184	0.568593	10.2566	1.10509e-24	3.53238e-23	Tmem106a	4.359	2.77568	56.9585	20.5205
ENSMUSG00000010538	11.6496	1.91179	0.826388	2.31343	0.0206991	0.0474908	Tsacc	0.439614	2.7744	3.76275	1.35624
ENSMUSG00000039611	111.713	-1.35522	0.349695	-3.87542	0.000106442	0.000469249	Tmem246	-2.82728	2.77419	0.390876	0.140898
ENSMUSG00000033653	129.955	1.50763	0.308833	4.8817	1.05177e-06	6.96294e-06	Vps8	0.0357953	2.77374	2.84342	1.02512
ENSMUSG00000006333	7595.23	3.56096	0.226049	15.753	6.5453e-56	7.24367e-54	Rps9	2.08935	2.77331	11.802	4.25555
ENSMUSG00000038576	181.041	-0.97588	0.286839	-3.40219	0.000668481	0.00243614	Susd4	-2.44605	2.77054	0.50843	0.183513
ENSMUSG00000029076	467.465	2.74487	0.257976	10.64	1.94048e-26	6.87729e-25	Sdf4	1.27581	2.76841	6.7033	2.42135
ENSMUSG00000063065	605.621	2.13536	0.259469	8.22974	1.87622e-16	3.79481e-15	Mapk3	0.666386	2.76825	4.39347	1.58709
ENSMUSG00000001313	314.772	-0.766072	0.321455	-2.38314	0.0171657	0.040714	Rnd2	-2.23467	2.76753	0.588016	0.21247
ENSMUSG00000020156	20.6192	1.33392	0.683913	1.95042	0.0511259	0.10016	Pwwp3a	-0.134634	2.76744	2.52087	0.910901
ENSMUSG00000007029	53.3267	2.40662	0.443678	5.42426	5.81952e-08	4.81105e-07	Vars	0.938344	2.76692	5.30232	1.91633
ENSMUSG00000029408	67.9481	-0.315814	0.389506	-0.810806	0.417477	0.530426	Abcb9	-1.78348	2.76573	0.803398	0.290483
ENSMUSG00000038860	109.44	0.525352	0.321495	1.63409	0.10224	0.176069	Garnl3	-0.942214	2.76555	1.43928	0.520434
ENSMUSG00000025505	44.2845	-0.0359841	0.533706	-0.0674231	0.946245	0.963576	Tmem80	-1.50311	2.76471	0.975366	0.352792
ENSMUSG00000041351	163.486	-0.21374	0.493446	-0.433157	0.664901	0.752798	Rap1gap	-1.68077	2.76452	0.862299	0.311917
ENSMUSG00000005949	65.8688	3.60506	0.553285	6.51574	7.23334e-11	8.62341e-10	Ctns	2.13845	2.76372	12.1683	4.40288
ENSMUSG00000041506	35.8446	1.58261	0.509857	3.10403	0.00190905	0.0061407	Rrp9	0.116287	2.76317	2.99511	1.08394
ENSMUSG00000040606	56.9445	-0.809237	0.424739	-1.90526	0.0567465	0.109238	Kazn	-2.27496	2.76201	0.570684	0.206619
ENSMUSG00000029478	144.011	1.53926	0.371883	4.13909	3.48683e-05	0.00017067	Ncor2	0.0735599	2.76197	2.90645	1.05231
ENSMUSG00000050705	219.037	0.0668173	0.412133	0.162125	0.871207	0.910317	2310061I04Rik	-1.39744	2.75921	1.0474	0.379603
ENSMUSG00000029231	6.75071	-0.490913	1.21851	-0.402878	0.687038	0.77111	Pdgfra	-1.95501	2.7589	0.711575	0.25792
ENSMUSG00000024906	32.049	1.65299	0.535744	3.08542	0.00203266	0.00649379	Mus81	0.190208	2.7564	3.14485	1.14093
ENSMUSG00000035049	13.1935	0.699171	0.806234	0.867206	0.385829	0.499687	Rrp12	-0.763571	2.75632	1.62357	0.589036
ENSMUSG00000002052	127.084	1.40479	0.311288	4.51281	6.39729e-06	3.6519e-05	Supt6	-0.0578377	2.75609	2.64779	0.960703
ENSMUSG00000026202	544.879	-0.569143	0.251568	-2.26238	0.0236738	0.0530705	Tuba4a	-2.03121	2.75503	0.674017	0.24465
ENSMUSG00000002799	20.8248	0.677961	0.728885	0.930134	0.352302	0.465463	Jag2	-0.781443	2.74995	1.59988	0.581785
ENSMUSG00000020692	24.7864	2.27812	0.619774	3.67573	0.000237167	0.000965709	Nle1	0.819518	2.74843	4.85046	1.76482
ENSMUSG00000026270	54.4279	-0.703657	0.474925	-1.48162	0.138442	0.225283	Capn10	-2.16111	2.74623	0.614014	0.223584
ENSMUSG00000083019	8.23418	1.6303	1.21044	1.34687	0.178024	0.274464	NA	0.172929	2.74608	3.09578	1.12735
ENSMUSG00000023707	69.2952	0.72767	0.415569	1.75102	0.0799428	0.143703	Ogfod2	-0.729023	2.74478	1.65596	0.603313
ENSMUSG00000096768	147.653	0.428327	0.419016	1.02222	0.306677	0.418572	Erdr1	-1.02833	2.74471	1.34567	0.490277
ENSMUSG00000066357	165.699	0.130776	0.309177	0.422981	0.672309	0.759009	Wdr6	-1.32578	2.74452	1.09488	0.398934
ENSMUSG00000040490	27.0607	-0.893296	0.654422	-1.36501	0.172248	0.267884	Lrfn2	-2.34942	2.74371	0.538383	0.196225
ENSMUSG00000022468	8.42855	-1.31341	1.24205	-1.05745	0.290305	0.401431	Endou	-2.76913	2.74293	0.402369	0.146693
ENSMUSG00000031980	59.2431	-0.822058	0.423261	-1.9422	0.0521129	0.101788	Agt	-2.27616	2.73986	0.565635	0.206446
ENSMUSG00000048281	13.685	-3.64452	1.11883	-3.25745	0.00112418	0.00385831	Dleu7	-5.09783	2.73836	0.079963	0.0292011
ENSMUSG00000027425	60.7007	1.94555	0.405288	4.80042	1.58331e-06	1.01055e-05	Kat14	0.492879	2.73715	3.85186	1.40725
ENSMUSG00000068263	4.15595	-0.990983	1.34541	-0.736568	0.461385	0.573995	Efcc1	-2.44324	2.73635	0.503135	0.183871
ENSMUSG00000050144	87.1115	0.208789	0.36936	0.565271	0.571889	0.671824	Slc25a44	-1.24327	2.73599	1.15572	0.422413
ENSMUSG00000022212	187.01	-0.488253	0.390683	-1.24974	0.211395	0.314584	Cpne6	-1.94017	2.73572	0.712888	0.260585
ENSMUSG00000038058	5.59558	2.86352	1.25043	2.29004	0.0220193	0.0499146	Nod1	1.412	2.73495	7.27788	2.66106
ENSMUSG00000027849	15.9137	-1.26511	1.05773	-1.19607	0.23167	0.336726	Syt6	-2.71588	2.73354	0.416067	0.152208
ENSMUSG00000028622	97.6329	0.95636	0.432395	2.21177	0.0269823	0.0591072	Mrpl37	-0.493213	2.73127	1.94041	0.710441
ENSMUSG00000025153	103.964	-0.527881	0.344519	-1.53223	0.125466	0.20827	Fasn	-1.97681	2.73006	0.693573	0.254051
ENSMUSG00000040883	74.5625	0.983383	0.424771	2.31509	0.0206079	0.0473345	Tmem205	-0.465288	2.72957	1.9771	0.724327
ENSMUSG00000035969	90.0512	0.434895	0.566592	0.767562	0.442747	0.555791	Rusc2	-1.01343	2.72891	1.35181	0.495367
ENSMUSG00000018820	78.9909	0.583813	0.391539	1.49107	0.135942	0.222046	Zfyve27	-0.86388	2.72772	1.49881	0.549473
ENSMUSG00000041845	4.42156	-0.979108	1.36213	-0.718805	0.472261	0.583844	Rhod	-2.42662	2.72737	0.507293	0.186001
ENSMUSG00000040479	349.197	0.74433	0.293325	2.53756	0.0111627	0.0281916	Dgkz	-0.702097	2.72532	1.6752	0.614678
ENSMUSG00000024944	366.304	0.66774	0.377676	1.76802	0.0770573	0.139435	Arl2	-0.77616	2.72055	1.58858	0.583919
ENSMUSG00000049303	23.9485	-0.888526	0.720779	-1.23273	0.217676	0.321405	Syt12	-2.33226	2.72024	0.540166	0.198573
ENSMUSG00000003531	133.949	0.386857	0.461574	0.838125	0.40196	0.51495	Dgcr6	-1.05673	2.71996	1.30754	0.480721
ENSMUSG00000012848	4145.99	2.21397	0.249473	8.8746	7.01833e-19	1.65992e-17	Rps5	0.770553	2.71964	4.6395	1.70592
ENSMUSG00000018858	177.211	0.690349	0.377032	1.83101	0.0670991	0.124626	Mrpl58	-0.75304	2.71959	1.61367	0.593352
ENSMUSG00000036278	48.5095	1.2341	0.507097	2.43366	0.0149472	0.0361755	Macrod1	-0.208082	2.71732	2.35235	0.865687
ENSMUSG00000037904	44.7462	0.447147	0.506557	0.882718	0.377389	0.49076	Ankrd9	-0.994836	2.71694	1.36334	0.501793
ENSMUSG00000015484	11.2214	-0.73539	0.877564	-0.83799	0.402036	0.514991	Fam163a	-2.17655	2.71539	0.600656	0.221204
ENSMUSG00000020473	42.1232	-0.181324	0.576327	-0.31462	0.75305	0.822996	Aebp1	-1.62227	2.71499	0.881893	0.324824
ENSMUSG00000062309	29.3903	-0.806004	0.582036	-1.3848	0.166113	0.260073	Rpp25	-2.24508	2.71146	0.571964	0.210943
ENSMUSG00000048758	1691.04	1.83708	0.178798	10.2746	9.16867e-25	2.95488e-23	Rpl29	0.398023	2.71144	3.57287	1.3177
ENSMUSG00000043388	204.26	-0.739394	0.344653	-2.14533	0.0319266	0.0678006	Tmem130	-2.17787	2.71034	0.598991	0.221002
ENSMUSG00000070282	7.98523	0.786086	1.33571	0.588516	0.556186	0.658278	NA	-0.652351	2.71027	1.72439	0.636243
ENSMUSG00000023192	19.5359	-1.07161	0.741379	-1.44542	0.148339	0.237881	Grm2	-2.5098	2.70981	0.475789	0.17558
ENSMUSG00000063268	27.4794	4.71461	0.726062	6.4934	8.39194e-11	9.92398e-10	Parp10	3.27854	2.70583	26.2567	9.70375
ENSMUSG00000002603	617.029	7.054	0.397523	17.7449	1.88708e-70	3.30409e-68	Tgfb1	5.6189	2.70401	132.882	49.1425
ENSMUSG00000051146	1038.85	-1.11717	0.403206	-2.77072	0.00559318	0.0156708	Camk2n2	-2.55137	2.70232	0.460996	0.170593
ENSMUSG00000033819	90.7874	0.617308	0.460695	1.33995	0.180262	0.277404	Ppp1r16a	-0.815564	2.69984	1.53401	0.568186
ENSMUSG00000034274	38.2963	1.68593	0.500506	3.36845	0.000755926	0.00271684	Thoc5	0.253083	2.69979	3.21747	1.19175
ENSMUSG00000002957	113.165	0.812838	0.31857	2.55152	0.0107255	0.0272694	Ap2a2	-0.619969	2.69971	1.75666	0.650685
ENSMUSG00000059540	33.8048	0.235302	0.560231	0.420008	0.67448	0.760727	Tcea2	-1.19725	2.69923	1.17715	0.436106
ENSMUSG00000047617	154.5	0.449562	0.452638	0.993204	0.32061	0.433105	Paxx	-0.982798	2.69888	1.36563	0.505998
ENSMUSG00000036948	98.5271	1.50273	0.379797	3.95668	7.59977e-05	0.000344619	Map11	0.0708766	2.69794	2.83379	1.05035
ENSMUSG00000020654	58.0368	0.160624	0.407697	0.393978	0.693597	0.775504	Adcy3	-1.27089	2.6973	1.11777	0.414404
ENSMUSG00000074649	528.951	1.29253	0.220713	5.85615	4.73719e-09	4.4744e-08	BC029722	-0.138289	2.69599	2.44957	0.908596
ENSMUSG00000047804	47.366	2.99962	0.585828	5.12031	3.05036e-07	2.24914e-06	Akap10	1.56965	2.69441	7.99789	2.96832
ENSMUSG00000009090	470.035	1.38351	0.21722	6.36917	1.90058e-10	2.14648e-09	Ap1b1	-0.0464106	2.69432	2.60902	0.968343
ENSMUSG00000046329	701.854	-0.777859	0.299401	-2.59805	0.0093754	0.0243164	Slc25a23	-2.20775	2.69426	0.583231	0.216472
ENSMUSG00000050854	18.3431	-2.75077	0.878551	-3.13103	0.00174194	0.00566059	Tmem125	-4.18021	2.69342	0.148572	0.055161
ENSMUSG00000041881	609.423	1.40613	0.273524	5.1408	2.73566e-07	2.03629e-06	Ndufa7	-0.0223126	2.69157	2.65026	0.984653
ENSMUSG00000027931	25.925	1.35634	0.629467	2.15474	0.0311822	0.0665329	Npr1	-0.0718071	2.69101	2.56035	0.951445
ENSMUSG00000073702	1967.5	2.14739	0.259159	8.28599	1.17127e-16	2.41055e-15	Rpl31	0.719505	2.69052	4.43026	1.64662
ENSMUSG00000031862	95.2028	1.729	0.345787	5.0002	5.72721e-07	3.98021e-06	Atp13a1	0.301748	2.68935	3.31499	1.23264
ENSMUSG00000032239	204.431	1.2454	0.280155	4.44539	8.77335e-06	4.87081e-05	Rp9	-0.181481	2.68864	2.37084	0.881797
ENSMUSG00000038500	20.9792	0.988035	0.6354	1.55498	0.119951	0.200448	Prr3	-0.438821	2.6886	1.98348	0.737737
ENSMUSG00000002984	267.089	0.860817	0.247878	3.47275	0.000515161	0.00193079	Tomm40	-0.565899	2.68834	1.81607	0.675535
ENSMUSG00000030549	3.4857	0.743895	1.46395	0.508143	0.611353	NA	Rhcg	-0.682372	2.6875	1.67469	0.62314
ENSMUSG00000030600	49.1924	-0.146941	0.785168	-0.187146	0.851547	0.895356	Lrfn1	-1.57279	2.68672	0.903164	0.336158
ENSMUSG00000057098	15.3117	0.0762415	0.779971	0.0977492	0.922131	0.947161	Ebf1	-1.34857	2.6848	1.05427	0.39268
ENSMUSG00000024382	82.8274	1.76148	0.448109	3.93092	8.46219e-05	0.000379908	Ercc3	0.336775	2.6846	3.39046	1.26293
ENSMUSG00000051790	100.303	-0.0972093	0.360879	-0.269368	0.787646	0.847773	Nlgn2	-1.52158	2.68398	0.93484	0.348304
ENSMUSG00000031070	3.69709	-0.379857	1.43558	-0.264602	0.791316	0.850241	Mrgprf	-1.80246	2.68068	0.768514	0.286686
ENSMUSG00000031078	55.5678	-0.498518	0.435769	-1.144	0.252625	0.36066	Cttn	-1.91916	2.67704	0.707834	0.264409
ENSMUSG00000055745	48.3424	0.595519	0.476862	1.24883	0.211727	0.31488	Rtl6	-0.824539	2.67596	1.51102	0.564662
ENSMUSG00000066129	56.7952	-0.776203	0.528674	-1.46821	0.142048	0.230034	Kndc1	-2.19533	2.67424	0.583902	0.218343
ENSMUSG00000035781	71.6565	0.559518	0.436965	1.28046	0.200382	0.301469	R3hdm4	-0.859042	2.67319	1.47378	0.551318
ENSMUSG00000037902	1409.54	3.72292	0.205179	18.1447	1.41365e-73	2.67476e-71	Sirpa	2.30485	2.67228	13.2042	4.94117
ENSMUSG00000042804	5.60674	-0.025628	1.32265	-0.0193762	0.984541	0.989857	Gpr153	-1.44355	2.67201	0.982393	0.367661
ENSMUSG00000026608	71.9944	-0.580429	0.518116	-1.12027	0.262599	0.37124	Kctd3	-1.99831	2.67194	0.668765	0.250292
ENSMUSG00000029168	26.8351	-0.80558	0.633203	-1.27223	0.203291	0.305119	Dpysl5	-2.2226	2.67033	0.572132	0.214255
ENSMUSG00000021951	68.2031	0.72996	0.468881	1.55681	0.119515	0.199825	Eef1akmt1	-0.686447	2.6692	1.65859	0.621382
ENSMUSG00000026424	301.673	-0.552626	0.365596	-1.51158	0.130642	0.215156	Gpr37l1	-1.96884	2.66883	0.681778	0.255459
ENSMUSG00000001786	46.9308	0.390978	0.444909	0.878782	0.379519	0.49293	Fbxo7	-1.02467	2.6678	1.31128	0.491521
ENSMUSG00000026819	66.5209	-0.496076	0.388237	-1.27777	0.201332	0.302661	Slc25a25	-1.9114	2.66719	0.709033	0.265835
ENSMUSG00000041329	648.68	-1.02567	0.253118	-4.05215	5.07495e-05	0.000240251	Atp1b2	-2.4395	2.66444	0.491182	0.184347
ENSMUSG00000003228	5.67829	0.206086	1.22772	0.16786	0.866693	0.906731	Grk5	-1.20771	2.66437	1.15355	0.432956
ENSMUSG00000060950	33.3137	1.33066	0.53334	2.49495	0.0125976	0.0312833	Trmt61a	-0.0827896	2.66372	2.51517	0.94423
ENSMUSG00000061298	9.91193	-0.389235	0.939488	-0.414306	0.67865	0.763742	Agbl4	-1.80181	2.66212	0.763534	0.286814
ENSMUSG00000028614	22.697	0.341574	0.621604	0.549504	0.58266	0.681202	Ndc1	-1.06943	2.65923	1.26714	0.476506
ENSMUSG00000020755	54.8251	1.31823	0.420797	3.13269	0.00173214	0.00563614	Sap30bp	-0.0921469	2.65806	2.49359	0.938126
ENSMUSG00000062012	20.1268	-0.908778	0.729333	-1.24604	0.212749	0.315962	Zfp13	-2.31799	2.65592	0.532636	0.200546
ENSMUSG00000019578	389.266	1.25083	0.33201	3.76746	0.000164918	0.000696669	Ubxn6	-0.1581	2.65541	2.37979	0.896205
ENSMUSG00000069020	244.714	1.2298	0.460092	2.67294	0.00751905	0.0201983	Urm1	-0.177021	2.65152	2.34534	0.884528
ENSMUSG00000023809	33.5833	-0.346988	0.646426	-0.53678	0.59142	0.688903	Rps6ka2	-1.75373	2.65138	0.786224	0.296533
ENSMUSG00000023967	236.424	0.599784	0.303727	1.97475	0.0482967	0.0956719	Mrps18a	-0.805573	2.64883	1.51549	0.572135
ENSMUSG00000032470	285.55	0.619688	0.244112	2.53854	0.0111317	0.0281435	Mras	-0.784236	2.6462	1.53654	0.58066
ENSMUSG00000006471	15.5796	1.17804	0.828451	1.42197	0.155034	0.24647	Ndor1	-0.225785	2.64601	2.26269	0.855129
ENSMUSG00000060260	35.2254	1.06636	0.54418	1.95958	0.0500451	0.0984702	Pwwp2b	-0.337216	2.64557	2.09415	0.791567
ENSMUSG00000017167	137.464	-0.931352	0.408421	-2.28037	0.0225858	0.0510607	Cntnap1	-2.33463	2.64503	0.524367	0.198246
ENSMUSG00000051864	121.555	3.05682	0.334197	9.14674	5.86781e-20	1.46147e-18	Tbc1d22a	1.65444	2.64336	8.32134	3.14801
ENSMUSG00000067787	217.298	0.371515	0.328422	1.13121	0.257966	0.366102	Blcap	-1.03084	2.64334	1.29371	0.489424
ENSMUSG00000016252	548.25	1.28639	0.206274	6.23631	4.48025e-10	4.8174e-09	Atp5e	-0.115181	2.64189	2.43917	0.923266
ENSMUSG00000064284	45.5924	1.57322	0.461309	3.41033	0.000648831	0.00237412	Cdpf1	0.172014	2.64122	2.97568	1.12663
ENSMUSG00000025188	37.0828	2.87694	0.535458	5.37285	7.75013e-08	6.29182e-07	Hps1	1.47585	2.64099	7.34588	2.78148
ENSMUSG00000098274	1479.98	1.17735	0.293488	4.01158	6.0313e-05	0.000280099	Rpl24	-0.223277	2.64016	2.26161	0.856617
ENSMUSG00000095098	8.82526	0.611437	0.976709	0.626018	0.531303	0.637025	Ccdc85b	-0.788791	2.63943	1.52778	0.578829
ENSMUSG00000026197	66.6777	1.56681	0.471697	3.32164	0.000894887	0.00316775	Zfand2b	0.166705	2.63921	2.96249	1.12249
ENSMUSG00000034839	34.9534	-0.481616	0.507943	-0.948169	0.343043	0.456056	Larp6	-1.88101	2.6379	0.716175	0.271494
ENSMUSG00000027434	11.2429	-1.87014	0.883579	-2.11655	0.0342981	0.0718998	Nkx2-2	-3.26918	2.63727	0.273547	0.103724
ENSMUSG00000044024	223.077	-0.712123	0.388836	-1.83142	0.0670373	0.124551	Rell2	-2.11111	2.63716	0.610421	0.23147
ENSMUSG00000028857	211.155	0.924604	0.378699	2.44153	0.0146253	0.035529	Tmem222	-0.473876	2.63624	1.89816	0.720027
ENSMUSG00000032300	281.315	5.58917	0.328288	17.0252	5.33993e-65	7.83035e-63	1700017B05Rik	4.19072	2.63617	48.1402	18.2614
ENSMUSG00000069844	12.9241	-0.0230343	0.854105	-0.0269689	0.978485	0.986049	Sco1	-1.42129	2.63583	0.984161	0.373378
ENSMUSG00000071649	273.674	0.326821	0.323194	1.01122	0.311911	0.424382	B3gat3	-1.07142	2.63579	1.25425	0.475852
ENSMUSG00000073433	109.639	-0.671334	0.338829	-1.98134	0.0475535	0.0942951	Arhgdig	-2.06881	2.63441	0.627926	0.238355
ENSMUSG00000017756	12.6349	3.01255	0.861168	3.49821	0.000468385	0.00177647	Slc12a7	1.61627	2.63221	8.0699	3.06582
ENSMUSG00000041645	334	0.769684	0.25509	3.01731	0.00255031	0.00794339	Ddx24	-0.626483	2.63201	1.7049	0.647753
ENSMUSG00000038181	83.4653	1.55175	0.378843	4.09601	4.20333e-05	0.000201839	Chpf2	0.156102	2.63106	2.93172	1.11427
ENSMUSG00000020848	57.1973	-0.848162	0.444329	-1.90886	0.0562801	0.108464	Doc2b	-2.24356	2.63061	0.555492	0.211165
ENSMUSG00000024966	364.039	0.905283	0.259824	3.48421	0.000493587	0.00185943	Stip1	-0.490111	2.6306	1.87291	0.71197
ENSMUSG00000070564	10.2248	-0.630964	0.911897	-0.691924	0.488985	0.599089	Ntn5	-2.02539	2.62884	0.645745	0.245639
ENSMUSG00000046574	43.6649	1.41658	0.498928	2.83924	0.00452209	0.0129926	Prr12	0.0236687	2.62607	2.66951	1.01654
ENSMUSG00000017929	80.6445	-0.179861	0.360598	-0.498786	0.61793	0.711727	B4galt5	-1.57274	2.62603	0.882788	0.336169
ENSMUSG00000062960	7.96604	1.64153	1.08715	1.50994	0.131059	0.215662	Kdr	0.249161	2.6251	3.11997	1.18852
ENSMUSG00000043857	33.9051	-0.653627	0.656018	-0.996354	0.319078	0.431781	Mgat5b	-2.04514	2.62354	0.63568	0.242298
ENSMUSG00000019370	868.248	-0.148322	0.236996	-0.625841	0.53142	0.637025	Calm3	-1.53972	2.62334	0.902299	0.343951
ENSMUSG00000025791	88.4983	0.652994	0.411171	1.58813	0.112256	0.190218	Pgm2	-0.738372	2.62327	1.57243	0.599415
ENSMUSG00000079478	121.122	1.02445	0.403132	2.54121	0.0110468	0.0279837	Sssca1	-0.365932	2.62147	2.03418	0.775968
ENSMUSG00000032338	9.89136	-1.02735	1.01704	-1.01014	0.312428	0.424939	Hcn4	-2.41763	2.62129	0.49061	0.187163
ENSMUSG00000014498	3.44894	0.75405	1.48804	0.50674	0.612337	NA	Ankrd52	-0.636225	2.62129	1.68652	0.643394
ENSMUSG00000075706	2196.76	1.30482	0.241202	5.40967	6.31425e-08	5.1857e-07	Gpx4	-0.0852211	2.62086	2.47053	0.94264
ENSMUSG00000037523	33.964	3.18695	0.627701	5.07719	3.83067e-07	2.7705e-06	Mavs	1.79698	2.62073	9.10685	3.47493
ENSMUSG00000052146	6213.32	2.48172	0.223383	11.1097	1.12554e-28	4.49106e-27	Rps10	1.09414	2.61639	5.58562	2.13486
ENSMUSG00000020882	136.174	-0.463568	0.370061	-1.25268	0.210322	0.313426	Cacnb1	-1.8508	2.61577	0.72519	0.277238
ENSMUSG00000048668	31.7191	0.407067	0.636631	0.639408	0.522558	0.629247	Rhno1	-0.980056	2.61557	1.32599	0.50696
ENSMUSG00000025736	58.9493	1.08117	0.426344	2.5359	0.0112158	0.0282953	Jmjd8	-0.305825	2.61533	2.11575	0.80898
ENSMUSG00000026207	120.985	0.8108	0.317828	2.55107	0.0107394	0.0272988	Speg	-0.576123	2.6152	1.75418	0.670764
ENSMUSG00000032641	34.9008	-1.46288	0.547897	-2.67	0.00758512	0.0203199	Gpr19	-2.84977	2.61514	0.362767	0.138718
ENSMUSG00000071341	118.637	-0.500544	0.481861	-1.03877	0.29891	0.410695	Egr4	-1.88691	2.61419	0.70684	0.270385
ENSMUSG00000038429	189.591	0.952449	0.326016	2.92148	0.00348369	0.0104067	Usp5	-0.433195	2.61289	1.93516	0.74062
ENSMUSG00000074884	1082.04	2.73531	0.204455	13.3786	8.06531e-41	5.43759e-39	Serf2	1.35133	2.60989	6.65904	2.55146
ENSMUSG00000063316	1265.85	2.45546	0.192026	12.7871	1.93579e-37	1.12979e-35	Rpl27	1.0738	2.60568	5.48487	2.10497
ENSMUSG00000003411	109.796	-1.01516	0.517912	-1.96009	0.0499849	0.098371	Rab3b	-2.39654	2.60519	0.494775	0.189919
ENSMUSG00000034110	6.99714	-0.617965	1.04702	-0.590211	0.555049	0.657307	Kctd7	-1.99866	2.60394	0.651589	0.250232
ENSMUSG00000022394	41.0075	0.598112	0.498293	1.20032	0.230014	0.334901	L3mbtl2	-0.782306	2.60344	1.51373	0.581436
ENSMUSG00000027254	316.553	-1.18618	0.259644	-4.5685	4.91233e-06	2.86272e-05	Map1a	-2.56492	2.60041	0.439463	0.168998
ENSMUSG00000055799	12.2132	-1.12815	0.851446	-1.32498	0.185178	0.283405	Tcf7l1	-2.50655	2.59981	0.457503	0.175976
ENSMUSG00000027223	191.771	-0.400509	0.337581	-1.18641	0.235461	0.341011	Mapk8ip1	-1.77855	2.59915	0.757591	0.291476
ENSMUSG00000005716	227.8	-0.420686	0.305352	-1.37771	0.168294	0.262557	Pvalb	-1.79825	2.59829	0.74707	0.287523
ENSMUSG00000032431	33.1487	3.04791	0.599311	5.0857	3.66271e-07	2.65752e-06	Crtap	1.6707	2.59766	8.27016	3.1837
ENSMUSG00000001227	39.4725	-0.547157	0.57162	-0.957204	0.338464	0.451299	Sema6b	-1.92427	2.59749	0.684368	0.263473
ENSMUSG00000028648	1016.81	0.478347	0.203299	2.35292	0.0186267	0.043528	Ndufs5	-0.898696	2.59735	1.39315	0.536371
ENSMUSG00000038550	18.8373	-1.6072	0.720466	-2.23078	0.0256957	0.056832	Ciart	-2.98409	2.59707	0.328235	0.126386
ENSMUSG00000027315	157.134	6.97718	0.545629	12.7874	1.92842e-37	1.12979e-35	Spint1	5.60062	2.59647	125.991	48.5239
ENSMUSG00000026418	7.45863	-1.14162	1.17255	-0.97362	0.330245	0.443187	Tnni1	-2.51794	2.59606	0.453252	0.174592
ENSMUSG00000025318	136.124	-0.100639	0.45255	-0.222383	0.824016	0.874473	Jph3	-1.47644	2.59512	0.93262	0.359375
ENSMUSG00000056856	10.871	-1.17328	0.965923	-1.21468	0.22449	0.32857	NA	-2.54809	2.59334	0.443411	0.170981
ENSMUSG00000045948	368.756	0.594499	0.23797	2.49822	0.012482	0.0310358	Mrps12	-0.779747	2.59232	1.50995	0.582469
ENSMUSG00000002147	59.541	4.38017	0.544367	8.04635	8.52998e-16	1.62708e-14	Stat6	3.00655	2.5912	20.8239	8.03639
ENSMUSG00000020776	32.8761	1.31357	0.525296	2.50062	0.0123975	0.0308452	Fbf1	-0.0586322	2.58865	2.48555	0.960174
ENSMUSG00000049526	4.74867	0.0302512	2.00944	0.0150545	0.987989	0.992186	Tmem202	-1.34081	2.58662	1.02119	0.394798
ENSMUSG00000036634	225.819	-0.228484	0.349374	-0.653982	0.513124	0.621459	Mag	-1.59941	2.58636	0.853531	0.330012
ENSMUSG00000004626	110.385	3.91941	0.412007	9.51297	1.85301e-21	5.08548e-20	Stxbp2	2.54857	2.58621	15.1308	5.85056
ENSMUSG00000037260	47.3245	1.00487	0.444369	2.26135	0.0237377	0.0531934	Hgsnat	-0.365347	2.5851	2.00677	0.776282
ENSMUSG00000000915	37.8667	-0.8625	0.531914	-1.6215	0.10491	0.179822	Hip1r	-2.23264	2.58495	0.549999	0.21277
ENSMUSG00000001082	67.0768	3.72062	0.529206	7.03058	2.05673e-12	2.89646e-11	Mfsd10	2.35059	2.58476	13.1832	5.10034
ENSMUSG00000019188	332.534	1.71669	0.270683	6.34206	2.26707e-10	2.53286e-09	H13	0.347215	2.58377	3.28682	1.2721
ENSMUSG00000013275	70.6788	-0.617257	0.406381	-1.51891	0.128785	0.212665	Slc41a1	-1.98651	2.58337	0.651909	0.252349
ENSMUSG00000003166	169.418	0.669725	0.32922	2.03428	0.0419237	0.0848968	Dgcr2	-0.699425	2.58318	1.59077	0.615818
ENSMUSG00000005357	61.0985	-0.294368	0.579346	-0.508103	0.611381	0.7064	Slc1a6	-1.66257	2.58148	0.81543	0.315876
ENSMUSG00000047921	189.051	1.23807	0.32695	3.78673	0.000152642	0.000649962	Trappc9	-0.12995	2.58116	2.35883	0.913863
ENSMUSG00000055210	3.67887	0.446638	1.33692	0.334081	0.738319	0.810596	Foxd2	-0.919543	2.57787	1.36286	0.528676
ENSMUSG00000003123	97.3539	3.8131	0.393609	9.68754	3.40628e-22	9.7224e-21	Lipe	2.44705	2.57764	14.0559	5.45301
ENSMUSG00000009076	72.8277	2.06756	0.404639	5.10965	3.22758e-07	2.36938e-06	Zmat5	0.701539	2.57759	4.19178	1.62624
ENSMUSG00000001120	110.173	-0.563476	0.337322	-1.67044	0.0948331	0.165352	Pcbp3	-1.92923	2.57711	0.67667	0.262569
ENSMUSG00000026630	86.3856	5.05985	0.520835	9.71489	2.60536e-22	7.50946e-21	Batf3	3.69534	2.57489	33.3555	12.9541
ENSMUSG00000096606	146.312	5.15386	0.423783	12.1616	4.97978e-34	2.52891e-32	Tpbgl	3.78947	2.57467	35.6014	13.8275
ENSMUSG00000028373	8.55747	-0.528714	1.04341	-0.506718	0.612353	0.707115	Astn2	-1.89246	2.57353	0.693172	0.269347
ENSMUSG00000042292	81.1351	1.33606	0.369251	3.6183	0.000296549	0.00118046	Mrtfa	-0.0276499	2.57346	2.52461	0.981017
ENSMUSG00000050910	17.4181	-0.224138	0.7443	-0.301139	0.763308	0.830152	Cdr2l	-1.58742	2.57271	0.856106	0.332765
ENSMUSG00000036957	40.1771	-0.0126476	0.490726	-0.0257733	0.979438	0.986465	Lrfn3	-1.37551	2.57194	0.991272	0.385417
ENSMUSG00000024163	354.999	0.0332846	0.401082	0.082987	0.933862	0.955779	Mapk8ip3	-1.32872	2.57043	1.02334	0.39812
ENSMUSG00000062661	177.8	-0.262928	0.343901	-0.764544	0.444543	0.557568	Ncs1	-1.62466	2.56994	0.833395	0.324286
ENSMUSG00000059022	11.4355	3.82954	1.10708	3.45914	0.000541899	0.00202195	Kcp	2.46828	2.56909	14.2169	5.53383
ENSMUSG00000045625	38.8664	-0.473818	0.58427	-0.810957	0.41739	0.530373	Pigz	-1.83465	2.56834	0.720057	0.280359
ENSMUSG00000040390	126.006	0.043151	0.365826	0.117955	0.906104	0.935929	Map3k10	-1.31746	2.56794	1.03036	0.40124
ENSMUSG00000053646	28.8069	-1.08885	0.667765	-1.63058	0.102978	0.177079	Plxnb1	-2.44941	2.56786	0.470137	0.183085
ENSMUSG00000027215	542.82	4.41165	0.266446	16.5574	1.41645e-61	1.86701e-59	Cd82	3.05136	2.56735	21.2832	8.28995
ENSMUSG00000054256	6.99961	-0.498299	1.11408	-0.447275	0.654676	0.744043	Msi1	-1.85807	2.56645	0.707941	0.275844
ENSMUSG00000034254	65.292	0.42656	0.608638	0.700843	0.483401	0.594732	Agpat1	-0.933082	2.56621	1.34402	0.523738
ENSMUSG00000026227	11.1895	-1.19662	0.921649	-1.29835	0.194168	0.294135	2810459M11Rik	-2.55599	2.56572	0.436296	0.170048
ENSMUSG00000036026	127.563	-0.652127	0.310778	-2.09837	0.0358728	0.0746936	Tmem63b	-2.01109	2.56502	0.636341	0.248085
ENSMUSG00000030098	13.972	-0.222513	0.840017	-0.264892	0.791093	0.850079	Grip2	-1.58116	2.56444	0.857071	0.334214
ENSMUSG00000074129	413.467	1.71506	0.297321	5.76839	8.00317e-09	7.34626e-08	Rpl13a	0.357098	2.56323	3.28311	1.28085
ENSMUSG00000035754	32.4082	0.969656	0.566454	1.7118	0.0869334	0.153702	Wdr18	-0.387453	2.56171	1.95837	0.764478
ENSMUSG00000034390	184.921	0.475399	0.26707	1.78006	0.0750669	0.136507	Cmip	-0.881207	2.56082	1.3903	0.542913
ENSMUSG00000000223	15.6861	-0.14362	0.727093	-0.197527	0.843415	0.88938	Drp2	-1.50012	2.56063	0.905245	0.353524
ENSMUSG00000029535	100.364	2.34496	0.350711	6.68631	2.28866e-11	2.88072e-10	Triap1	0.989222	2.55928	5.08047	1.98511
ENSMUSG00000059974	220.57	-0.587789	0.61008	-0.963462	0.335316	0.448221	Ntm	-1.94307	2.55848	0.665362	0.260062
ENSMUSG00000015942	20.991	1.21363	0.626908	1.93589	0.0528812	0.103141	Gtf2ird2	-0.141221	2.5577	2.3192	0.906752
ENSMUSG00000003380	266.573	1.71062	0.350323	4.88299	1.04491e-06	6.92142e-06	Rabac1	0.355817	2.55763	3.27302	1.27971
ENSMUSG00000024248	1115.96	1.49498	0.266782	5.60376	2.09746e-08	1.83896e-07	Cox7a2l	0.140356	2.55731	2.8186	1.10218
ENSMUSG00000020440	480.35	1.02489	0.253713	4.03956	5.35507e-05	0.000251482	Arf5	-0.329719	2.55728	2.0348	0.795691
ENSMUSG00000047085	187.336	-0.794998	0.314384	-2.52875	0.011447	0.0287547	Lrrc4b	-2.14942	2.55695	0.576344	0.225403
ENSMUSG00000003545	16.1645	-0.1434	0.733179	-0.195587	0.844933	0.890318	Fosb	-1.49756	2.55648	0.905383	0.354152
ENSMUSG00000040010	19.524	1.76004	0.671584	2.62072	0.00877431	0.023052	Slc7a5	0.406424	2.55552	3.38707	1.3254
ENSMUSG00000041757	35.5871	-0.477025	0.68276	-0.698671	0.484758	0.595832	Plekha6	-1.83046	2.5552	0.718458	0.281175
ENSMUSG00000030805	219.2	1.71116	0.262897	6.50888	7.57118e-11	8.98962e-10	Stx4a	0.359151	2.55268	3.27425	1.28267
ENSMUSG00000063445	32.9308	1.58313	0.631703	2.50613	0.0122062	0.0304272	Nmral1	0.231202	2.55253	2.99619	1.17381
ENSMUSG00000039349	28.054	-0.286471	0.597779	-0.479226	0.631778	0.72407	C130074G19Rik	-1.63829	2.55233	0.819905	0.321237
ENSMUSG00000031816	41.9507	0.117331	0.466048	0.251757	0.801229	0.857124	Mthfsd	-1.23395	2.55139	1.08473	0.425151
ENSMUSG00000032175	7.93971	3.46885	2.74616	1.26316	0.20653	0.308873	Tyk2	2.11789	2.55082	11.072	4.34057
ENSMUSG00000042096	29.6877	0.0379703	0.567952	0.0668547	0.946697	0.963829	Dao	-1.31249	2.54993	1.02667	0.402626
ENSMUSG00000056116	90.6698	1.99335	0.360582	5.52815	3.2362e-08	2.76503e-07	H2-T22	0.644299	2.54745	3.98161	1.56298
ENSMUSG00000034799	55.778	-0.244031	0.572578	-0.426196	0.669965	0.757091	Unc13a	-1.59257	2.54654	0.844383	0.331581
ENSMUSG00000044328	50.9909	1.88611	0.454444	4.15036	3.3195e-05	0.00016307	Trp53i13	0.537653	2.54639	3.69636	1.45161
ENSMUSG00000017740	31.4265	-0.253789	0.610207	-0.415907	0.677478	0.762789	Slc12a5	-1.60107	2.54433	0.838691	0.329632
ENSMUSG00000013787	308.787	1.83502	0.344675	5.32391	1.01558e-07	8.06617e-07	Ehmt2	0.487992	2.54387	3.56776	1.40249
ENSMUSG00000046245	20.1784	6.00863	1.1322	5.30703	1.11427e-07	8.76695e-07	Pilra	4.66166	2.54377	64.3839	25.3105
ENSMUSG00000020092	96.3839	6.37434	0.573265	11.1193	1.01005e-28	4.044e-27	Pald1	5.02767	2.54323	82.9595	32.6198
ENSMUSG00000042472	11.8483	-0.289292	0.905886	-0.319346	0.749464	0.820222	Zfp410	-1.63586	2.54307	0.818304	0.321778
ENSMUSG00000055553	181.059	0.921953	0.308907	2.98456	0.00283983	0.00873008	Kxd1	-0.423703	2.54146	1.89468	0.745509
ENSMUSG00000019173	693.406	2.8532	0.263479	10.8289	2.51119e-27	9.352e-26	Rab5c	1.50757	2.54141	7.22599	2.8433
ENSMUSG00000017943	78.6285	-0.351067	0.3741	-0.938432	0.348023	0.460789	Gdap1l1	-1.69579	2.53982	0.784004	0.308685
ENSMUSG00000032280	114.812	2.85705	0.40679	7.0234	2.16531e-12	3.03118e-11	Tle3	1.51244	2.53961	7.24533	2.85293
ENSMUSG00000039515	436.952	1.4168	0.321414	4.40803	1.04316e-05	5.70771e-05	Ptpa	0.0721991	2.5396	2.66993	1.05132
ENSMUSG00000068580	81.3289	2.00381	0.393188	5.0963	3.46352e-07	2.5252e-06	Zfyve19	0.66044	2.53743	4.01057	1.58056
ENSMUSG00000034686	128.737	-0.996048	0.317959	-3.13263	0.0017325	0.00563614	Prr7	-2.33929	2.53721	0.501372	0.197607
ENSMUSG00000004562	135.409	2.64467	0.30867	8.56795	1.05341e-17	2.33603e-16	Arhgef40	1.30312	2.53422	6.25352	2.46763
ENSMUSG00000006476	473.068	-0.194853	0.258631	-0.753401	0.451209	0.563648	Nsmf	-1.53599	2.53351	0.873662	0.344842
ENSMUSG00000015337	48.0129	0.441103	0.469022	0.940475	0.346974	0.459965	Endog	-0.899998	2.53345	1.35764	0.535887
ENSMUSG00000029545	163.998	4.8168	0.36265	13.2822	2.93617e-40	1.92426e-38	Acads	3.47722	2.53078	28.1839	11.1364
ENSMUSG00000041598	89.775	0.87275	0.351116	2.48565	0.0129316	0.0319773	Cdc42ep4	-0.466769	2.53067	1.83115	0.723584
ENSMUSG00000003190	9.16662	4.18957	1.16774	3.58777	0.000333516	0.00130677	Bcl2l12	2.85115	2.52874	18.2468	7.21578
ENSMUSG00000004366	509.738	-1.17924	0.25244	-4.67137	2.99203e-06	1.8224e-05	Sst	-2.51756	2.52856	0.441584	0.174638
ENSMUSG00000051586	10.594	0.703841	0.963521	0.730488	0.465092	0.577109	Mical3	-0.634285	2.52823	1.62884	0.64426
ENSMUSG00000026791	112.262	1.73732	0.340825	5.0974	3.44347e-07	2.51585e-06	Slc2a8	0.399422	2.52783	3.33416	1.31898
ENSMUSG00000030811	47.557	1.27301	0.471272	2.70121	0.00690875	0.0187564	Fbxl19	-0.064708	2.5275	2.41664	0.956139
ENSMUSG00000069806	188.231	-1.30577	0.306658	-4.25805	2.06215e-05	0.000106055	Cacng7	-2.64248	2.52576	0.404506	0.160153
ENSMUSG00000004885	3.02004	-0.920075	1.53766	-0.598359	0.549601	NA	Crabp2	-2.25651	2.52526	0.528482	0.209278
ENSMUSG00000035493	38.5652	4.715	0.648462	7.27105	3.56701e-13	5.33053e-12	Tgfbi	3.37935	2.5239	26.2638	10.406
ENSMUSG00000005611	4.71264	0.0205863	1.50444	0.0136837	0.989082	0.992721	Mrvi1	-1.31469	2.52324	1.01437	0.402012
ENSMUSG00000038390	258.712	-0.426578	0.343509	-1.24182	0.214302	0.317743	Gpr162	-1.76165	2.52289	0.744025	0.29491
ENSMUSG00000002012	79.9979	-0.902105	0.491306	-1.83614	0.0663372	0.123595	Pnck	-2.23712	2.52279	0.535105	0.212109
ENSMUSG00000003526	52.1398	-0.419361	0.47156	-0.889306	0.373839	0.487549	Prodh	-1.75427	2.5226	0.747756	0.296423
ENSMUSG00000020653	7.48425	0.225388	1.05885	0.212861	0.831436	0.879968	Klf11	-1.10871	2.52117	1.16909	0.463709
ENSMUSG00000025142	39.9694	2.23116	0.491079	4.54339	5.53569e-06	3.1974e-05	Aspscr1	0.897325	2.52072	4.69513	1.86261
ENSMUSG00000091955	9.69102	2.21901	1.89031	1.17388	0.240442	0.346726	NA	0.885418	2.52029	4.65574	1.8473
ENSMUSG00000031971	23.4338	-0.868336	0.619222	-1.4023	0.160825	0.253658	Ccsap	-2.20153	2.51959	0.547778	0.217407
ENSMUSG00000028961	209.696	3.39216	0.317306	10.6905	1.12768e-26	4.03318e-25	Pgd	2.05946	2.51873	10.4988	4.16831
ENSMUSG00000039713	53.1108	0.277434	0.44666	0.621131	0.534514	0.639247	Plekhg5	-1.05525	2.51872	1.21204	0.481212
ENSMUSG00000037321	100.554	4.70098	0.440181	10.6796	1.26766e-26	4.52003e-25	Tap1	3.36905	2.51738	26.0097	10.332
ENSMUSG00000025223	249.986	2.3982	0.272644	8.7961	1.41653e-18	3.30364e-17	Ldb1	1.06701	2.51611	5.27147	2.09509
ENSMUSG00000019577	3.53924	-0.542376	1.40792	-0.385233	0.700065	NA	Pdk4	-1.87267	2.51455	0.686639	0.273067
ENSMUSG00000020439	5.25233	1.98593	1.22933	1.61546	0.106212	0.181655	Smtn	0.655895	2.51409	3.96119	1.57559
ENSMUSG00000006301	115.854	1.23836	0.343852	3.60142	0.000316484	0.00124815	Tmbim1	-0.0911988	2.51325	2.35929	0.938742
ENSMUSG00000032259	25.7422	-0.18836	0.627008	-0.300411	0.763864	0.830558	Drd2	-1.51779	2.51304	0.877603	0.34922
ENSMUSG00000071454	77.0739	0.519425	0.433236	1.19894	0.23055	0.33539	Dtnb	-0.809867	2.51279	1.43338	0.570435
ENSMUSG00000022208	203.668	-0.673462	0.328587	-2.04957	0.0404064	0.0825078	Jph4	-2.00207	2.51161	0.627	0.249641
ENSMUSG00000078193	2796.12	1.73133	0.232148	7.45789	8.79198e-14	1.39944e-12	NA	0.403075	2.51099	3.32034	1.32232
ENSMUSG00000006058	510.228	0.907158	0.218832	4.14545	3.39146e-05	0.000166396	Snf8	-0.420613	2.51015	1.87535	0.747107
ENSMUSG00000021993	19.7065	-0.0462112	0.691773	-0.0668012	0.94674	0.963829	Mipep	-1.37349	2.50929	0.968476	0.385956
ENSMUSG00000030030	39.8832	-0.473151	0.49793	-0.950237	0.341992	0.454968	1700003E16Rik	-1.80009	2.5087	0.720389	0.287156
ENSMUSG00000034973	19.8374	0.0914351	0.643531	0.142083	0.887014	0.921997	Dop1a	-1.23524	2.50823	1.06543	0.424773
ENSMUSG00000071451	131.993	2.31063	0.364448	6.34007	2.29656e-10	2.56092e-09	Psmg4	0.984095	2.508	4.961	1.97807
ENSMUSG00000015127	55.7712	-0.206975	0.430962	-0.480264	0.63104	0.723417	Unkl	-1.53339	2.50779	0.866352	0.345464
ENSMUSG00000038342	17.1789	2.47874	0.746785	3.31922	0.000902701	0.00319133	Mlxip	1.15237	2.50771	5.57411	2.22279
ENSMUSG00000005986	67.5554	-0.0848174	0.432011	-0.196331	0.844351	0.889864	Ankrd13d	-1.41034	2.50624	0.942904	0.376223
ENSMUSG00000030697	32.0773	2.07486	0.583666	3.55488	0.000378153	0.00146843	Ppp4c	0.751175	2.50305	4.21304	1.68316
ENSMUSG00000030685	113.923	-0.932971	0.342547	-2.72363	0.00645694	0.0177019	Kctd13	-2.2561	2.50209	0.523779	0.209337
ENSMUSG00000069227	56.8561	-0.510469	0.485655	-1.05109	0.293215	0.404434	Gprin1	-1.83356	2.50202	0.701994	0.280572
ENSMUSG00000030796	9.68578	-2.66959	1.37262	-1.94488	0.0517894	0.101274	Tead2	-3.99253	2.50176	0.157172	0.0628243
ENSMUSG00000033938	896.672	1.10435	0.224883	4.9108	9.07076e-07	6.09445e-06	Ndufb7	-0.218239	2.50115	2.15002	0.859614
ENSMUSG00000018347	25.3533	1.42405	0.607394	2.34452	0.0190515	0.0443319	Zkscan6	0.101805	2.50055	2.68338	1.07312
ENSMUSG00000040964	61.9774	1.24683	0.428322	2.91096	0.00360323	0.0107147	Arhgef10l	-0.0753092	2.50036	2.37319	0.949139
ENSMUSG00000079435	457.051	1.72514	0.214133	8.05639	7.85807e-16	1.50626e-14	Rpl36a	0.403157	2.50009	3.30612	1.3224
ENSMUSG00000050567	17.7565	2.11906	0.739052	2.86727	0.00414033	0.0120466	Maml1	0.797326	2.49966	4.34411	1.73788
ENSMUSG00000039427	142.631	1.74442	0.386216	4.51668	6.28165e-06	3.59289e-05	Alg1	0.423098	2.49894	3.35059	1.3408
ENSMUSG00000039179	30.8045	-0.77592	0.602155	-1.28857	0.197547	0.298023	Tekt5	-2.0968	2.49819	0.584016	0.233776
ENSMUSG00000055053	264.442	0.964108	0.285389	3.37822	0.000729571	0.00263099	Nfic	-0.354761	2.4947	1.95086	0.781999
ENSMUSG00000024622	64.1081	1.05474	0.438523	2.40521	0.0161632	0.0386724	Hmgxb3	-0.262906	2.49259	2.07734	0.833408
ENSMUSG00000026170	34.3001	2.49308	0.582935	4.27678	1.89618e-05	9.85126e-05	Cyp27a1	1.17643	2.49088	5.62979	2.26016
ENSMUSG00000041556	219.13	-0.648502	0.348984	-1.85826	0.0631327	0.118821	Fbxo2	-1.96476	2.49019	0.637942	0.256182
ENSMUSG00000027646	209.63	1.0121	0.365995	2.76533	0.00568646	0.0159018	Src	-0.304103	2.4901	2.01684	0.809946
ENSMUSG00000034429	16.3632	1.27669	0.773978	1.64952	0.0990419	0.171623	Zfp707	-0.0377823	2.48711	2.42282	0.974151
ENSMUSG00000032012	36.8133	-0.311079	0.543687	-0.572166	0.56721	0.667731	Nectin1	-1.6255	2.48703	0.806038	0.324097
ENSMUSG00000038700	12.878	-0.918048	0.937854	-0.978882	0.327638	0.440569	Hoxb5	-2.23238	2.48687	0.529225	0.212807
ENSMUSG00000026811	148.691	-0.18837	0.294415	-0.63981	0.522296	0.62919	St6galnac6	-1.50261	2.48671	0.877597	0.352915
ENSMUSG00000062488	11.0594	0.975414	0.872835	1.11752	0.26377	0.372439	Ifit3b	-0.338587	2.4863	1.96621	0.790816
ENSMUSG00000038020	68.7955	-0.762709	0.465108	-1.63985	0.101035	0.174409	Rapgefl1	-2.0767	2.48628	0.589389	0.237057
ENSMUSG00000085787	49.0287	1.65494	0.45639	3.62615	0.000287682	0.00114906	NA	0.341136	2.48596	3.1491	1.26675
ENSMUSG00000059439	101.985	0.487854	0.412726	1.18203	0.237194	0.343033	Bcas3	-0.825837	2.48577	1.40236	0.564155
ENSMUSG00000003617	3.55287	1.05364	1.38094	0.762986	0.445472	NA	Cp	-0.258808	2.48362	2.07575	0.835778
ENSMUSG00000055912	30.5498	2.16318	0.638416	3.38835	0.000703141	0.00254428	Tmem150a	0.851113	2.48296	4.479	1.80389
ENSMUSG00000003279	262.224	-0.753955	0.309881	-2.43304	0.0149724	0.0362073	Dlgap1	-2.06539	2.48189	0.592976	0.238921
ENSMUSG00000004100	56.6837	2.24067	0.445993	5.02401	5.06044e-07	3.56327e-06	Ppan	0.92931	2.48176	4.72618	1.90436
ENSMUSG00000024044	16.0322	-0.135803	3.95296	-0.0343547	0.972594	0.982223	Epb41l3	-1.44708	2.48162	0.910163	0.366762
ENSMUSG00000041623	19.733	1.91659	0.718874	2.6661	0.00767358	0.020513	D11Wsu47e	0.605916	2.48058	3.77531	1.52195
ENSMUSG00000040940	90.2959	4.20269	0.421495	9.9709	2.04374e-23	6.29269e-22	Arhgef1	2.89249	2.47975	18.4134	7.4255
ENSMUSG00000056724	42.4931	3.65502	0.536622	6.81116	9.68161e-12	1.26194e-10	Nbeal2	2.34524	2.47903	12.5971	5.08146
ENSMUSG00000090077	12.5826	0.529292	0.867666	0.610018	0.54185	0.64552	Lime1	-0.780242	2.47861	1.44322	0.582269
ENSMUSG00000006369	10.1186	-0.245571	0.965777	-0.254273	0.799285	0.855809	Fbln1	-1.55487	2.47821	0.843482	0.34036
ENSMUSG00000041836	9.42467	-0.752235	2.70003	-0.278602	0.78055	0.842444	Ptpre	-2.06121	2.47765	0.593683	0.239616
ENSMUSG00000037771	333.629	-1.10695	0.322601	-3.43134	0.000600618	0.00221777	Slc32a1	-2.41583	2.47748	0.464274	0.187398
ENSMUSG00000038346	43.0062	2.14656	0.598531	3.58638	0.000335305	0.00131334	Zfp384	0.837709	2.47744	4.4277	1.78721
ENSMUSG00000034730	442.416	-0.51372	0.316552	-1.62286	0.10462	0.179455	Adgrb1	-1.82243	2.47719	0.700414	0.282745
ENSMUSG00000030747	151.04	-0.773154	0.404228	-1.91267	0.0557904	0.10768	Dgat2	-2.08162	2.47678	0.585137	0.236249
ENSMUSG00000004056	181.217	1.39131	0.331037	4.20289	2.6353e-05	0.000132624	Akt2	0.0834733	2.47571	2.62317	1.05957
ENSMUSG00000028917	134.884	0.726942	0.383538	1.89536	0.0580445	0.111216	Plekhm2	-0.580078	2.4743	1.65513	0.668927
ENSMUSG00000042165	111.797	0.318303	0.469936	0.677333	0.498195	0.607834	NA	-0.988634	2.47416	1.24686	0.503955
ENSMUSG00000006575	446.151	-0.347424	0.365079	-0.951639	0.34128	0.45433	Rundc3a	-1.65427	2.474	0.785986	0.317699
ENSMUSG00000020536	43.8133	0.673494	0.514301	1.30953	0.190354	0.289871	Llgl1	-0.633232	2.47379	1.59493	0.644731
ENSMUSG00000037221	77.3027	1.41762	0.393692	3.60083	0.0003172	0.00124994	Mospd3	0.110923	2.47374	2.67144	1.07992
ENSMUSG00000006215	36.253	1.31392	0.610214	2.15321	0.031302	0.066728	Zbtb17	0.00872073	2.47118	2.48616	1.00606
ENSMUSG00000039208	19.9907	0.152354	0.656162	0.23219	0.816391	0.868276	Metrnl	-1.15261	2.47078	1.11138	0.44981
ENSMUSG00000018899	75.9208	4.67625	0.536198	8.72112	2.75463e-18	6.38627e-17	Irf1	3.3713	2.47076	25.5677	10.3481
ENSMUSG00000050666	5.70098	-0.103934	1.13335	-0.0917052	0.926932	0.950594	Vstm4	-1.40854	2.47016	0.930492	0.376692
ENSMUSG00000001506	12.1756	-1.43455	0.941631	-1.52347	0.127641	0.211014	Col1a1	-2.73898	2.46987	0.369963	0.14979
ENSMUSG00000022441	2.91295	-0.448218	1.5293	-0.293087	0.769456	NA	Efcab6	-1.75254	2.46968	0.732947	0.296778
ENSMUSG00000032294	2074.61	0.926801	0.380251	2.43734	0.0147958	0.0358393	Pkm	-0.377187	2.46911	1.90106	0.769937
ENSMUSG00000039678	123.232	2.26103	0.336781	6.71365	1.89818e-11	2.4073e-10	Tbc1d13	0.957261	2.46873	4.79334	1.94162
ENSMUSG00000027890	22.4821	1.53927	0.624298	2.4656	0.0136784	0.0335834	Gstm4	0.236375	2.46723	2.90647	1.17803
ENSMUSG00000028072	5.00724	-0.62139	1.20566	-0.515395	0.606277	0.702096	Ntrk1	-1.9237	2.46623	0.650044	0.263578
ENSMUSG00000000538	132.675	-0.166759	0.433138	-0.385003	0.700235	0.780875	Tom1l2	-1.46906	2.46621	0.890842	0.361218
ENSMUSG00000004748	129.198	-0.850189	0.340554	-2.49649	0.0125429	0.0311541	Mtfp1	-2.15226	2.46582	0.554712	0.22496
ENSMUSG00000032788	304.916	0.243477	0.244658	0.995172	0.319652	0.432259	Pdxk	-1.05783	2.46452	1.18384	0.480354
ENSMUSG00000026883	82.0334	-0.964722	0.442108	-2.18209	0.0291026	0.0629894	Dab2ip	-2.26503	2.46282	0.512377	0.208045
ENSMUSG00000038696	139.839	1.78153	0.310953	5.72926	1.00869e-08	9.17283e-08	Mapkap1	0.481617	2.46215	3.43791	1.39631
ENSMUSG00000033453	4.16686	-0.522144	1.372	-0.380571	0.703521	0.783118	Adamts15	-1.82205	2.46212	0.696336	0.28282
ENSMUSG00000020284	63.0345	0.692303	0.437234	1.58337	0.113338	0.191497	Cfap410	-0.605569	2.45866	1.61586	0.657212
ENSMUSG00000021242	1227.77	5.02519	0.271128	18.5344	1.08973e-76	2.3243e-74	Npc2	3.72747	2.45841	32.5637	13.2458
ENSMUSG00000037239	33.096	-0.589556	0.541863	-1.08802	0.276588	0.386637	Spred3	-1.88717	2.45821	0.664548	0.270338
ENSMUSG00000020477	232.619	0.938327	0.358523	2.6172	0.0088655	0.0232431	Mrps24	-0.35884	2.45746	1.9163	0.779791
ENSMUSG00000009551	5.81214	-1.16117	1.2622	-0.919957	0.357595	0.470602	6330409D20Rik	-2.45817	2.45717	0.447149	0.181978
ENSMUSG00000031486	8.46945	0.367644	1.04283	0.352545	0.72443	0.80014	Adgra2	-0.928178	2.45517	1.29024	0.525522
ENSMUSG00000068742	123.82	-0.613991	0.341149	-1.79977	0.0718966	0.131887	Cry2	-1.9097	2.45497	0.653387	0.266148
ENSMUSG00000042535	89.9947	2.31155	0.417388	5.53812	3.05729e-08	2.62747e-07	Gtpbp1	1.01602	2.45467	4.96415	2.02233
ENSMUSG00000044933	24.8218	-0.347153	0.6552	-0.529843	0.596221	0.693119	Sstr3	-1.64261	2.45455	0.786134	0.320277
ENSMUSG00000038244	134.367	-0.660043	0.396895	-1.66302	0.0963092	0.167585	Mical2	-1.95524	2.4541	0.63286	0.257878
ENSMUSG00000046719	71.785	-1.16931	0.415308	-2.81553	0.00486971	0.0138825	Nxph3	-2.46391	2.45309	0.444634	0.181254
ENSMUSG00000056962	81.1614	2.04618	0.371859	5.50257	3.743e-08	3.16576e-07	Jmjd6	0.751808	2.4527	4.13011	1.6839
ENSMUSG00000034271	97.3858	0.0539703	0.36773	0.146766	0.883317	0.919612	Jdp2	-1.24019	2.45233	1.03812	0.423318
ENSMUSG00000078765	145.352	0.919413	0.340631	2.69915	0.00695173	0.0188644	U2af1l4	-0.374683	2.45223	1.89135	0.771275
ENSMUSG00000015087	333.804	0.476886	0.36744	1.29786	0.194335	0.294278	Rabl6	-0.816449	2.45094	1.39174	0.567838
ENSMUSG00000028785	994.031	-0.479062	0.268735	-1.78265	0.0746427	0.135926	Hpca	-1.77186	2.45002	0.717444	0.292832
ENSMUSG00000060275	7.40357	-0.381098	1.03507	-0.368185	0.712735	0.790397	Nrg2	-1.67351	2.44937	0.767853	0.31349
ENSMUSG00000060938	3198.54	1.80261	0.198755	9.06951	1.19553e-19	2.92182e-18	Rpl26	0.510251	2.44929	3.48851	1.4243
ENSMUSG00000003199	173.738	1.02098	0.39056	2.61414	0.0089453	0.0233922	Mpnd	-0.271194	2.44896	2.02929	0.828633
ENSMUSG00000064036	4.93914	-0.331399	1.29665	-0.255581	0.798274	0.855054	Mro	-1.62341	2.4487	0.794765	0.324567
ENSMUSG00000020486	192.677	-0.566599	0.383075	-1.47908	0.139119	0.226197	Sept4	-1.8583	2.44817	0.675207	0.275801
ENSMUSG00000050600	3.90169	-0.57714	1.35542	-0.425802	0.670252	0.757319	Zfp831	-1.86609	2.4435	0.670291	0.274316
ENSMUSG00000029123	4.46361	-1.98592	1.64032	-1.21069	0.226013	0.330181	Stk32b	-3.27425	2.44246	0.252451	0.10336
ENSMUSG00000005354	659.877	1.04409	0.261019	4.00004	6.3332e-05	0.00029181	Txn2	-0.243984	2.44201	2.06206	0.84441
ENSMUSG00000020766	36.9657	2.54205	0.557633	4.55864	5.14851e-06	2.98552e-05	Galk1	1.25411	2.44179	5.82416	2.3852
ENSMUSG00000050875	34.7384	-1.30836	0.605951	-2.15918	0.0308362	0.0659628	Minar2	-2.59554	2.4405	0.40378	0.16545
ENSMUSG00000032352	12.0391	-0.138449	0.823763	-0.168069	0.866529	0.90664	Lrrc1	-1.42434	2.43833	0.908495	0.37259
ENSMUSG00000035390	181.556	-0.575551	0.508148	-1.13264	0.257364	0.365557	Brsk1	-1.86098	2.43754	0.67103	0.275289
ENSMUSG00000039474	71.5054	-1.31287	0.403849	-3.25089	0.00115046	0.00393127	Wfs1	-2.59783	2.43677	0.40252	0.165186
ENSMUSG00000035172	31.8352	0.749211	0.638455	1.17347	0.240606	0.34692	Plekhh3	-0.534666	2.43492	1.68087	0.690319
ENSMUSG00000020644	12.3207	-0.295143	3.95306	-0.074662	0.940484	0.960126	Id2	-1.57829	2.43369	0.814991	0.334878
ENSMUSG00000029016	87.598	0.184675	0.349223	0.528818	0.596932	0.693808	Clcn6	-1.09835	2.43349	1.13656	0.46705
ENSMUSG00000026180	12.7283	-1.64356	0.9678	-1.69824	0.0894626	0.157325	Cxcr2	-2.92638	2.43314	0.320066	0.131544
ENSMUSG00000037428	327.224	-1.11922	0.292163	-3.83079	0.000127733	0.00055354	Vgf	-2.40187	2.43287	0.460344	0.189219
ENSMUSG00000063354	17.2416	4.93618	1.02275	4.82639	1.39033e-06	8.98128e-06	Slc39a4	3.65423	2.43168	30.6153	12.5902
ENSMUSG00000030786	1104.47	7.58194	0.314803	24.0847	3.61409e-128	2.23141e-125	Itgam	6.30057	2.4307	191.599	78.8246
ENSMUSG00000028195	25.0704	-0.380201	0.59309	-0.641051	0.52149	0.628348	Ccn1	-1.661	2.42973	0.768331	0.316221
ENSMUSG00000061306	204.465	2.00628	0.300834	6.66906	2.57453e-11	3.23014e-10	Slc38a10	0.726238	2.42846	4.01744	1.65432
ENSMUSG00000057219	43.2443	2.32271	0.489566	4.74443	2.09093e-06	1.30611e-05	Armc7	1.04289	2.42809	5.00272	2.06035
ENSMUSG00000000531	61.0647	-0.641799	0.43196	-1.48578	0.137336	0.223887	Grasp	-1.92121	2.42739	0.640913	0.264034
ENSMUSG00000049600	58.1169	1.22146	0.684541	1.78435	0.0743665	0.13557	Zbtb45	-0.0578272	2.42719	2.33183	0.96071
ENSMUSG00000024392	240.34	1.13392	0.272825	4.1562	3.23587e-05	0.000159362	Bag6	-0.143746	2.42446	2.19454	0.905166
ENSMUSG00000027962	8.07091	0.139504	0.996262	0.140027	0.888638	0.923198	Vcam1	-1.13776	2.42379	1.10153	0.454465
ENSMUSG00000063160	115.592	-0.350608	0.349604	-1.00287	0.315922	0.428331	Numbl	-1.62732	2.42285	0.784253	0.32369
ENSMUSG00000002341	42.6507	-0.718073	0.514339	-1.39611	0.162682	0.255751	Ncan	-1.99435	2.42212	0.607909	0.250982
ENSMUSG00000029022	24.8076	1.91155	0.639135	2.99083	0.00278218	0.00858211	Miip	0.635798	2.42124	3.76212	1.5538
ENSMUSG00000003316	280.834	1.48635	0.349593	4.25167	2.12184e-05	0.000108791	Glg1	0.210677	2.42112	2.8018	1.15723
ENSMUSG00000045532	42.3697	-0.485047	0.579805	-0.836569	0.402835	0.515676	C1ql1	-1.76072	2.42111	0.714474	0.295102
ENSMUSG00000033307	856.775	0.74742	0.29999	2.49148	0.0127212	0.0315436	Mif	-0.528012	2.42071	1.67879	0.69351
ENSMUSG00000001524	38.9465	1.10176	0.495186	2.22493	0.0260857	0.0575101	Gtf2h4	-0.173471	2.42037	2.14616	0.886707
ENSMUSG00000042675	628.081	1.52623	0.27802	5.48963	4.0277e-08	3.40165e-07	Ypel3	0.251059	2.42028	2.88032	1.19008
ENSMUSG00000004996	40.196	2.35003	0.588591	3.99265	6.53403e-05	0.000299886	Mri1	1.07494	2.42014	5.09836	2.10664
ENSMUSG00000040717	2.45711	-1.31635	1.8755	-0.701865	0.482763	NA	Il17rd	-2.59133	2.41996	0.401551	0.165933
ENSMUSG00000032968	13.5943	-0.115129	0.810347	-0.142073	0.887022	0.921997	Inha	-1.38967	2.41923	0.9233	0.381651
ENSMUSG00000053293	183.531	0.737008	0.334222	2.20515	0.0274439	0.0599746	Pom121	-0.537514	2.41919	1.66672	0.688957
ENSMUSG00000005575	440.348	0.987668	0.30602	3.22746	0.00124894	0.00421741	Ube2m	-0.286235	2.41815	1.98298	0.820039
ENSMUSG00000002043	147.469	2.62532	0.324231	8.09707	5.62989e-16	1.09164e-14	Trappc6a	1.35143	2.41813	6.1702	2.55164
ENSMUSG00000009681	78.4547	-0.054917	0.532145	-0.103199	0.917805	0.944201	Bcr	-1.32774	2.41634	0.96265	0.398391
ENSMUSG00000096145	140.569	3.28827	0.454532	7.23441	4.67565e-13	6.90807e-12	Vkorc1	2.01655	2.41449	9.7694	4.04616
ENSMUSG00000031823	122.295	1.23908	0.308897	4.01132	6.03801e-05	0.000280256	Zdhhc7	-0.0320675	2.41354	2.36049	0.978018
ENSMUSG00000028959	48.5289	0.555336	0.456985	1.21522	0.224283	0.328431	Fastk	-0.714656	2.4116	1.46951	0.609351
ENSMUSG00000001288	7.27249	1.00206	1.04093	0.962659	0.335719	0.448504	Rarg	-0.267812	2.41139	2.00285	0.830578
ENSMUSG00000002320	18.5435	1.90047	0.67417	2.81898	0.00481768	0.0137576	Tm9sf1	0.630809	2.41105	3.73335	1.54843
ENSMUSG00000003273	106.045	-0.849651	0.386133	-2.20041	0.0277779	0.0605806	Car11	-2.11795	2.40878	0.554919	0.230373
ENSMUSG00000028988	131.007	0.695726	0.299725	2.32122	0.0202751	0.0467559	Ctnnbip1	-0.572212	2.40817	1.6197	0.672585
ENSMUSG00000062234	107.427	1.82048	0.347608	5.23718	1.63047e-07	1.25671e-06	Gak	0.553043	2.40734	3.532	1.46718
ENSMUSG00000027820	24.7967	0.148886	0.631386	0.235808	0.813582	0.866383	Mme	-1.11736	2.40535	1.10871	0.460936
ENSMUSG00000011751	43.6722	-0.190335	0.649102	-0.293229	0.769347	0.834355	Sptbn4	-1.45644	2.40512	0.876402	0.36439
ENSMUSG00000048004	5.00352	-3.33264	1.6028	-2.07926	0.0375932	0.0777107	Tmem196	-4.59844	2.4046	0.0992602	0.0412793
ENSMUSG00000028743	94.0434	1.62463	0.394851	4.11453	3.8797e-05	0.000188147	Akr7a5	0.358995	2.40433	3.08363	1.28253
ENSMUSG00000021288	1227.93	0.21531	0.198902	1.08249	0.279034	0.388989	Klc1	-1.04997	2.40373	1.16095	0.48298
ENSMUSG00000001143	54.2615	1.67212	0.451818	3.70087	0.000214861	0.000880689	Lman2l	0.407059	2.40337	3.18682	1.32598
ENSMUSG00000030247	5.03547	-1.86864	1.29598	-1.44187	0.149338	0.239198	Kcnj8	-3.13356	2.40313	0.273831	0.113948
ENSMUSG00000034771	13.1747	0.0999761	0.939159	0.106453	0.915223	0.942293	Tle2	-1.16481	2.40292	1.07176	0.446023
ENSMUSG00000025793	203.608	0.975395	0.305867	3.18895	0.0014279	0.00475196	Hgs	-0.28871	2.40178	1.96618	0.818634
ENSMUSG00000039768	74.034	1.46639	0.454763	3.22451	0.00126187	0.0042574	Dnajc11	0.202416	2.40156	2.7633	1.15062
ENSMUSG00000062006	2402.66	2.01795	0.211168	9.55612	1.22255e-21	3.39048e-20	Rpl34	0.754627	2.40047	4.05007	1.6872
ENSMUSG00000058546	2010	1.50996	0.307373	4.91246	8.99413e-07	6.04989e-06	Rpl23a	0.247047	2.3998	2.84802	1.18678
ENSMUSG00000054474	11.7784	1.86638	0.842268	2.2159	0.0266983	0.0586402	Thnsl2	0.604009	2.3989	3.64617	1.51993
ENSMUSG00000020483	1317.37	0.457629	0.280458	1.63172	0.102738	0.176823	Dynll2	-0.803592	2.39699	1.37328	0.572921
ENSMUSG00000061207	136.292	1.09276	0.294923	3.70522	0.000211204	0.000867215	Stk19	-0.16825	2.39663	2.13281	0.889921
ENSMUSG00000004961	231.97	-0.98415	0.393497	-2.50104	0.0123831	0.0308289	Syt5	-2.24383	2.39442	0.505524	0.211126
ENSMUSG00000020097	211.131	4.41589	0.361887	12.2024	3.01831e-34	1.55298e-32	Sgpl1	3.15637	2.39415	21.3459	8.91586
ENSMUSG00000031837	158.159	-1.00145	0.334231	-2.9963	0.0027328	0.00845059	Necab2	-2.26049	2.39335	0.499496	0.208702
ENSMUSG00000008668	4275.67	2.0739	0.182321	11.375	5.56733e-30	2.38359e-28	Rps18	0.815265	2.3927	4.21025	1.75962
ENSMUSG00000042148	153.188	0.347119	0.385671	0.90004	0.368099	0.481724	Cox10	-0.91127	2.39229	1.27202	0.531717
ENSMUSG00000034911	2.82148	-0.0615071	2.15372	-0.0285585	0.977217	NA	Ushbp1	-1.31973	2.392	0.958263	0.400611
ENSMUSG00000020272	123.863	5.2244	0.478595	10.9161	9.65288e-28	3.67655e-26	Stk10	3.96648	2.3915	37.3853	15.6326
ENSMUSG00000100755	789.907	1.86012	0.254435	7.31078	2.65603e-13	4.02557e-12	NA	0.602418	2.39115	3.63038	1.51826
ENSMUSG00000074405	16.4107	1.53759	0.745089	2.06363	0.039053	0.0801769	Zfp865	0.2799	2.39112	2.90309	1.21411
ENSMUSG00000074576	29.9837	1.20733	0.553496	2.18128	0.0291627	0.0630613	Mocs3	-0.0492993	2.38937	2.3091	0.966406
ENSMUSG00000039640	209.988	0.635609	0.26992	2.3548	0.0185325	0.0433335	Mrpl12	-0.620994	2.38933	1.55359	0.650223
ENSMUSG00000038967	67.4251	-0.286609	0.452137	-0.633898	0.526148	0.632528	Pdk2	-1.54316	2.38923	0.819827	0.343134
ENSMUSG00000041921	19.2235	1.23315	0.652928	1.88865	0.0589388	0.112553	Metap1d	-0.0232918	2.38906	2.3508	0.983985
ENSMUSG00000057738	250.553	0.0896347	0.576071	0.155597	0.876351	0.913992	Sptan1	-1.16668	2.38884	1.0641	0.445447
ENSMUSG00000041889	333.697	-1.03319	0.303317	-3.40631	0.000658472	0.0024034	Shisa4	-2.28864	2.38742	0.488628	0.204668
ENSMUSG00000018167	198.722	2.96596	0.276296	10.7347	6.99185e-27	2.53153e-25	Stard3	1.71072	2.38707	7.81346	3.27325
ENSMUSG00000035007	60.621	0.869833	0.415257	2.09468	0.036199	0.075266	Rundc1	-0.385277	2.38685	1.82745	0.765632
ENSMUSG00000044502	156.917	0.141405	0.311393	0.454103	0.649754	0.739627	Bod1	-1.1133	2.38619	1.10298	0.462235
ENSMUSG00000059842	11.5867	0.41709	0.871504	0.478587	0.632233	0.724494	Zfp341	-0.836996	2.38516	1.33523	0.559808
ENSMUSG00000022214	67.9398	1.18409	0.401727	2.9475	0.00320356	0.0096634	Dcaf11	-0.0690458	2.38359	2.2722	0.953268
ENSMUSG00000025608	11.6784	-0.176358	0.849642	-0.207568	0.835566	0.883304	Podxl	-1.42905	2.38286	0.884934	0.371375
ENSMUSG00000019738	173.973	1.60936	0.281078	5.72569	1.03017e-08	9.35367e-08	Polr2i	0.356802	2.38264	3.05117	1.28058
ENSMUSG00000041815	119.723	1.94211	0.312781	6.20919	5.32585e-10	5.66947e-09	Poldip3	0.690115	2.38171	3.84268	1.61341
ENSMUSG00000040532	61.6708	0.419025	0.438303	0.956015	0.339064	0.451945	Abhd11	-0.832826	2.38147	1.33702	0.561428
ENSMUSG00000005674	78.2258	0.160708	0.463637	0.346625	0.728873	0.803698	Tomm40l	-1.09098	2.3812	1.11784	0.469442
ENSMUSG00000056492	3.71141	-1.07852	1.5579	-0.692291	0.488755	0.598933	Adgrf5	-2.32979	2.38051	0.473514	0.198913
ENSMUSG00000022359	24.8652	0.341384	0.671472	0.508411	0.611165	0.706293	Wdyhv1	-0.909883	2.3805	1.26697	0.532228
ENSMUSG00000037989	55.7967	-1.30426	0.558295	-2.33614	0.0194838	0.0451618	Wnk2	-2.55434	2.37855	0.40493	0.170242
ENSMUSG00000019428	391.408	1.07756	0.366852	2.93733	0.00331052	0.00995278	Fkbp8	-0.170398	2.37506	2.11047	0.888597
ENSMUSG00000030717	142.102	2.48067	0.31181	7.9557	1.78121e-15	3.31069e-14	Nupr1	1.23285	2.37482	5.58157	2.35031
ENSMUSG00000063889	17.6594	-0.297868	0.810254	-0.367624	0.713154	0.790514	Crem	-1.54564	2.37474	0.813453	0.342544
ENSMUSG00000044857	113.072	2.52516	0.337712	7.47726	7.58873e-14	1.21285e-12	Lemd2	1.2777	2.37423	5.75638	2.42452
ENSMUSG00000020329	38.3576	1.32617	0.507556	2.61286	0.00897886	0.0234538	Polrmt	0.0790938	2.3736	2.50736	1.05635
ENSMUSG00000059291	3490.46	2.06886	0.211414	9.78581	1.2955e-22	3.81846e-21	Rpl11	0.821944	2.37334	4.19556	1.76779
ENSMUSG00000058064	5.69119	0.784366	1.99259	0.393642	0.693846	0.775708	NA	-0.462223	2.3728	1.72233	0.725867
ENSMUSG00000028093	29.1484	1.99443	0.63129	3.15928	0.00158158	0.00519123	Acp6	0.747938	2.37263	3.98457	1.67939
ENSMUSG00000033985	6.91475	0.666943	1.04023	0.641152	0.521424	0.628333	Tesk2	-0.57917	2.37202	1.58771	0.669349
ENSMUSG00000051817	23.0321	-0.033993	0.711232	-0.0477945	0.96188	0.97476	Sox12	-1.2799	2.37168	0.976713	0.411823
ENSMUSG00000023175	1110.69	1.53058	0.243128	6.29536	3.0668e-10	3.37809e-09	Bsg	0.284866	2.37136	2.88902	1.2183
ENSMUSG00000042532	156.093	-0.662284	0.359295	-1.84329	0.0652873	0.122073	Golga7b	-1.90756	2.37064	0.631877	0.266543
ENSMUSG00000040007	40.6518	1.40832	0.480527	2.93078	0.00338112	0.0101365	Bahd1	0.163208	2.37037	2.65428	1.11977
ENSMUSG00000037624	90.4601	-0.526636	0.355333	-1.48209	0.138316	0.225146	Kcnk2	-1.77115	2.36939	0.694172	0.292974
ENSMUSG00000067713	250.504	1.23013	0.261183	4.70986	2.47892e-06	1.53296e-05	Prkag1	-0.0143224	2.36929	2.34589	0.990122
ENSMUSG00000074102	49.4051	0.812455	0.564782	1.43853	0.150284	0.240304	Rbm15b	-0.431548	2.36855	1.7562	0.741466
ENSMUSG00000042810	27.8091	0.315766	0.558418	0.565465	0.571757	0.671803	Krba1	-0.92816	2.36842	1.24467	0.525528
ENSMUSG00000000308	210.901	-0.402209	0.336644	-1.19476	0.232181	0.337269	Ckmt1	-1.6458	2.36787	0.756699	0.319569
ENSMUSG00000039662	166.238	0.708098	0.326723	2.16727	0.0302141	0.0648685	Icmt	-0.53489	2.36688	1.63365	0.690211
ENSMUSG00000004231	2.14869	-1.49776	2.05934	-0.727303	0.46704	NA	Pax2	-2.74057	2.36659	0.354102	0.149626
ENSMUSG00000061981	88.5372	-0.0313168	0.389259	-0.0804525	0.935877	0.95709	Flot2	-1.27352	2.36559	0.978527	0.413651
ENSMUSG00000003436	6.64153	-2.42187	1.51817	-1.59526	0.110654	0.187909	Dll3	-3.6632	2.36417	0.186614	0.0789343
ENSMUSG00000018849	97.3928	-1.08613	0.378218	-2.87171	0.00408258	0.0119106	Wwc1	-2.32721	2.36375	0.471023	0.199269
ENSMUSG00000018166	3.7033	-1.19849	1.43555	-0.834866	0.403793	0.516733	Erbb3	-2.43943	2.36351	0.43573	0.184357
ENSMUSG00000037206	14.2988	-0.439693	0.793001	-0.554467	0.579259	0.678511	Islr	-1.68004	2.36256	0.737291	0.312073
ENSMUSG00000015126	59.1596	0.853796	0.435592	1.96008	0.0499863	0.098371	Tsr3	-0.386515	2.3625	1.80725	0.764975
ENSMUSG00000028042	83.1726	2.38642	0.421773	5.65806	1.53091e-08	1.3626e-07	Zbtb7b	1.14674	2.36146	5.22858	2.21413
ENSMUSG00000093674	6909.49	1.70922	0.2188	7.81176	5.63935e-15	1.00387e-13	Rpl41	0.469901	2.36086	3.26983	1.38501
ENSMUSG00000044847	42.8796	0.0259303	0.496029	0.0522758	0.958309	0.972401	Lsm11	-1.21268	2.35971	1.01814	0.431466
ENSMUSG00000033055	34.6324	1.6065	0.553735	2.9012	0.00371737	0.0110011	Ankrd54	0.368008	2.35951	3.04512	1.29057
ENSMUSG00000067924	206.991	-0.410979	0.48025	-0.855762	0.392129	0.50571	Rtl8b	-1.64944	2.35946	0.752113	0.318764
ENSMUSG00000020230	107.175	0.384575	0.393617	0.97703	0.328554	0.441548	Prmt2	-0.853229	2.35839	1.30548	0.553545
ENSMUSG00000006920	173.81	1.43234	0.292865	4.89078	1.00438e-06	6.70599e-06	Ezh1	0.194798	2.35796	2.69883	1.14456
ENSMUSG00000041801	126.434	-0.435069	0.432161	-1.00673	0.314065	0.426621	Phlda3	-1.67223	2.35735	0.739658	0.313767
ENSMUSG00000000693	6.10555	3.0805	1.33069	2.31496	0.0206152	0.0473356	Loxl3	1.8436	2.35691	8.45906	3.58905
ENSMUSG00000040907	276.334	-1.37421	0.245754	-5.59183	2.24683e-08	1.96113e-07	Atp1a3	-2.6105	2.35591	0.385763	0.163743
ENSMUSG00000033249	12.7447	-0.73923	0.94169	-0.785004	0.432451	0.545415	Hsf4	-1.97545	2.35581	0.599059	0.25429
ENSMUSG00000040385	656.977	1.97377	0.219711	8.98349	2.62318e-19	6.29295e-18	Ppp1ca	0.738087	2.35492	3.92792	1.66796
ENSMUSG00000037752	16.9181	1.09096	0.743393	1.46754	0.142228	0.230294	Xkr8	-0.144445	2.35448	2.13016	0.904727
ENSMUSG00000015599	58.5602	-0.719593	0.54049	-1.33137	0.183067	0.281061	Ttbk1	-1.95457	2.35377	0.607269	0.257998
ENSMUSG00000044475	52.628	2.59878	0.443236	5.86319	4.54047e-09	4.3094e-08	Ascc1	1.36418	2.35316	6.05774	2.5743
ENSMUSG00000021508	246.263	-1.032	0.365103	-2.82659	0.00470465	0.013461	Cxcl14	-2.26614	2.35242	0.489033	0.207885
ENSMUSG00000049649	5.26385	-0.63116	1.16121	-0.543535	0.586762	0.684769	Gpr3	-1.86477	2.35154	0.645657	0.274567
ENSMUSG00000051169	20.1049	-0.211017	0.690666	-0.305526	0.759965	0.828105	Rpusd3	-1.44444	2.35125	0.863928	0.367434
ENSMUSG00000019823	31.1674	2.99896	0.596315	5.02915	4.92649e-07	3.4773e-06	Mical1	1.76625	2.35008	7.99423	3.40168
ENSMUSG00000046321	47.2098	-1.15825	0.471584	-2.45607	0.0140464	0.0343073	Hs3st2	-2.39064	2.34956	0.448057	0.190698
ENSMUSG00000040661	17.6722	1.15727	0.697057	1.66022	0.0968698	0.168303	Rad54l2	-0.0748454	2.34911	2.23035	0.949444
ENSMUSG00000029001	185.422	-1.19303	0.323234	-3.69091	0.000223457	0.000913688	Fbxo44	-2.4249	2.34872	0.437384	0.186222
ENSMUSG00000002625	100.522	1.73901	0.336068	5.17458	2.28424e-07	1.72657e-06	Akap8l	0.50727	2.34851	3.33807	1.42136
ENSMUSG00000001418	611.921	3.20668	0.29081	11.0267	2.84067e-28	1.11451e-26	Glmp	1.97541	2.34774	9.23224	3.9324
ENSMUSG00000049401	215.087	2.43869	0.267726	9.10891	8.3217e-20	2.05953e-18	Ogfr	1.20751	2.3476	5.4215	2.30938
ENSMUSG00000019261	15.7945	1.90929	3.84383	0.496714	0.619391	0.712771	Map1s	0.679041	2.34607	3.75623	1.60108
ENSMUSG00000025144	108.701	3.1166	0.359541	8.66829	4.38674e-18	9.97303e-17	Cenpx	1.88639	2.34601	8.67343	3.69709
[truncated: 10,102 more rows]
