# Supplementary material for: A new genetic strategy for targeting microglia in development and disease
Source: eLife. 2020 Jun 23;9:e54590. doi: 10.7554/eLife.54590 (PMC7375817; doi:10.7554/eLife.54590)
Supplement: Supplementary file 3. — A short list of BAM-targeting recombinase and DTR lines. [file elife-54590-supp3.xlsx]

## Sheet: Sheet1
CNS Border-associated Macrophage (BAM) Recombinase Lines
Name	Reference
Pf4-Cre	Tiedt et al. 2007
CD206-CreER	Nawaz et al. 2017
CD169-Cre	Karasawa et al. 2017
Lyve1-Cre	Pham et al. 2010
CD169-DTR	Miyake et al. 2007
References:
Karasawa, K., Asano, K., Moriyama, S., Ushiki, M., Monya, M., Iida, M., Kuboki, E., Yagita, H., Uchida, K., Nitta, K., & Tanaka, M. (2015). Vascular-resident CD169-positive monocytes and macrophages control neutrophil accumulation in the kidney with ischemia-reperfusion injury. Journal of the American Society of Nephrology : JASN, 26(4), 896–906. https://doi.org/10.1681/ASN.2014020195
Miyake, Y., Asano, K., Kaise, H., Uemura, M., Nakayama, M., & Tanaka, M. (2007). Critical role of macrophages in the marginal zone in the suppression of immune responses to apoptotic cell-associated antigens. Journal of Clinical Investigation, 117(8), 2268–2278. https://doi.org/10.1172/JCI31990
Nawaz, A., Aminuddin, A., Kado, T., Takikawa, A., Yamamoto, S., Tsuneyama, K., Igarashi, Y., Ikutani, M., Nishida, Y., Nagai, Y., Takatsu, K., Imura, J., Sasahara, M., Okazaki, Y., Ueki, K., Okamura, T., Tokuyama, K., Ando, A., Matsumoto, M., … Tobe, K. (2017). CD206+ M2-like macrophages regulate systemic glucose metabolism by inhibiting proliferation of adipocyte progenitors. Nature Communicatio…
Pham, T. H. M., Baluk, P., Xu, Y., Grigorova, I., Bankovich, A. J., Pappu, R., Coughlin, S. R., McDonald, D. M., Schwab, S. R., & Cyster, J. G. (2010). Lymphatic endothelial cell sphingosine kinase activity is required for lymphocyte egress and lymphatic patterning. The Journal of Experimental Medicine, 207(1), 17–27. https://doi.org/10.1084/jem.20091619
Tiedt, R., Schomber, T., Hao-Shen, H., & Skoda, R. C. (2007). Pf4-Cre transgenic mice allow the generation of lineage-restricted gene knockouts for studying megakaryocyte and platelet function in vivo. Blood, 109(4), 1503–1506. https://doi.org/10.1182/blood-2006-04-020362
